# Supplementary material
Source: MDPI journal article supplement (https://www.mdpi.com/1996-1073/10/9/1275)
Supplement: s1 [file s1]

## Sheet: Network Usage
Hora	Usage - Ubuntu 61	Usage - Ubuntu 62	Usage - Ubuntu 63	Usage - Ubuntu 64	Usage - Ubuntu 65	Usage - Ubuntu 66	Usage - Ubuntu 67	Usage - Ubuntu 68	Usage - Ubuntu 69	Usage - Ubuntu 70	Usage - Ubuntu 71	Usage - Ubuntu 72	Usage - Ubuntu 73	Usage - Ubuntu 74	Usage - Ubuntu 75	Usage - Ubuntu 76	Usage - Ubuntu 77	Usage - Ubuntu 78	Usage - Ubuntu 79	Usage - Ubuntu 80	Usage - Ubuntu 81	Usage - Ubuntu 82	Usage - Ubuntu 83	Usage - Ubuntu 84	Usage - Ubuntu 85
2017-04-05 17:00:00	24	20	3	0	27	0	0	1	2	0	0	0	0	0	0	0	0	0	0	0	0	0	0	0	0
2017-04-05 17:00:20	0	0	22	1	29	0	0	0	0	0	0	0	0	0	0	0	0	0	0	0	0	0	0	0	0
2017-04-05 17:00:40	0	0	0	0	0	0	0	0	0	0	0	0	0	0	0	0	0	0	0	0	0	0	0	0	0
2017-04-05 17:01:00	3	2	2	2	2	2	2	2	2	2	2	2	2	2	2	2	2	2	2	2	2	2	2	2	2
2017-04-05 17:01:20	1	0	0	0	0	0	0	0	0	0	0	0	0	0	0	0	0	0	0	0	0	0	0	0	0
2017-04-05 17:01:40	1	0	0	0	0	0	0	0	0	0	0	0	0	0	0	0	0	0	0	0	0	0	0	0	0
2017-04-05 17:02:00	1	0	0	0	0	0	0	0	0	0	0	0	0	0	0	0	0	0	0	0	0	0	0	0	0
2017-04-05 17:02:20	1	0	0	0	0	0	0	0	0	0	0	0	0	0	0	0	0	0	0	0	0	0	0	0	0
2017-04-05 17:02:40	1	0	0	0	0	0	0	0	0	0	0	0	0	0	0	0	0	0	0	0	0	0	0	0	0
2017-04-05 17:03:00	1	0	0	0	0	0	0	0	0	0	0	0	0	0	0	0	0	0	0	0	0	0	0	0	0
2017-04-05 17:03:20	1	0	0	0	0	0	0	0	0	0	0	0	0	0	0	0	0	0	0	0	0	0	0	0	0
2017-04-05 17:03:40	1	0	0	0	0	0	0	0	0	0	0	0	0	0	0	0	0	0	0	0	0	0	0	0	0
2017-04-05 17:04:00	1	0	0	0	0	0	0	0	0	0	0	0	0	0	0	0	0	0	0	0	0	0	0	0	0
2017-04-05 17:04:20	1	0	0	0	0	0	0	0	0	0	0	0	0	0	0	0	0	0	0	0	0	0	0	0	0
2017-04-05 17:04:40	2	0	0	0	0	0	0	0	0	0	0	0	0	0	0	0	0	0	0	0	0	0	0	0	0
2017-04-05 17:05:00	1	0	0	0	0	0	0	0	0	0	0	0	0	0	0	0	0	0	0	0	0	0	0	0	0
2017-04-05 17:05:20	1	0	0	0	0	0	0	0	0	0	0	0	0	0	0	0	0	0	0	0	0	0	0	0	0
2017-04-05 17:05:40	1	0	0	0	0	0	0	0	0	0	0	0	0	0	0	0	0	0	0	0	0	0	0	0	0
2017-04-05 17:06:00	1	0	0	0	0	0	0	0	0	0	0	0	0	0	0	0	0	0	0	0	0	0	0	0	0
	1.1875	0.125	0.125	0.125	0.125	0.125	0.125	0.125	0.125	0.125	0.125	0.125	0.125	0.125	0.125	0.125	0.125	0.125	0.125	0.125	0.125	0.125	0.125	0.125	0.125
2017-04-05 17:06:20	25	24	2	2	2	2	2	2	2	2	2	2	2	2	2	2	2	2	2	2	1	2	2	2	2
2017-04-05 17:06:40	26	24	0	0	0	0	0	0	0	0	0	0	0	0	0	0	0	0	0	0	0	0	0	0	0
2017-04-05 17:07:00	25	23	0	0	0	0	0	0	0	0	0	0	0	0	0	0	0	0	0	0	0	0	0	0	0
2017-04-05 17:07:20	26	22	0	0	0	0	0	0	0	0	0	0	0	0	0	0	0	0	0	0	0	0	0	0	0
2017-04-05 17:07:40	28	24	0	0	0	0	0	0	0	0	0	0	0	0	0	0	0	0	0	0	0	0	0	0	0
2017-04-05 17:08:00	26	24	0	0	0	0	0	0	0	0	0	0	0	0	0	0	0	0	0	0	0	0	0	0	0
2017-04-05 17:08:20	26	24	0	0	0	0	0	0	0	0	0	0	0	0	0	0	0	0	0	0	0	0	0	0	0
2017-04-05 17:08:40	27	24	0	0	0	0	0	0	0	0	0	0	0	0	0	0	0	0	0	0	0	0	0	0	0
2017-04-05 17:09:00	25	22	0	0	0	0	0	0	0	0	0	0	0	0	0	0	0	0	0	0	0	0	0	0	0
2017-04-05 17:09:20	28	24	0	0	0	0	0	0	0	0	0	0	0	0	0	0	0	0	0	0	0	0	0	0	0
2017-04-05 17:09:40	27	24	0	0	0	0	0	0	0	0	0	0	0	0	0	0	0	0	0	0	0	0	0	0	0
2017-04-05 17:10:00	26	23	0	0	0	0	0	0	0	0	0	0	0	0	0	0	0	0	0	0	0	0	0	0	0
2017-04-05 17:10:20	27	24	0	0	0	0	0	0	0	0	0	0	0	0	0	0	0	0	0	0	0	0	0	0	0
2017-04-05 17:10:40	26	22	0	0	0	0	0	0	0	0	0	0	0	0	0	0	0	0	0	0	0	0	0	0	0
2017-04-05 17:11:00	28	23	0	0	0	0	0	0	0	0	0	0	0	0	0	0	0	0	0	0	0	0	0	0	0
	26.4	23.4	0.133333	0.133333	0.133333	0.133333	0.133333	0.133333	0.133333	0.133333	0.133333	0.133333	0.133333	0.133333	0.133333	0.133333	0.133333	0.133333	0.133333	0.133333	0.0666667	0.133333	0.133333	0.133333	0.133333
2017-04-05 17:11:20	32	21	20	2	2	2	2	2	2	2	2	2	2	2	2	2	2	2	2	2	2	2	2	2	2
2017-04-05 17:11:40	29	17	19	0	0	0	0	0	0	0	0	0	0	0	0	0	0	0	0	0	0	0	0	0	0
2017-04-05 17:12:00	35	19	19	0	0	0	0	0	0	0	0	0	0	0	0	0	0	0	0	0	0	0	0	0	0
2017-04-05 17:12:20	29	19	19	0	0	0	0	0	0	0	0	0	0	0	0	0	0	0	0	0	0	0	0	0	0
2017-04-05 17:12:40	28	17	18	0	0	0	0	0	0	0	0	0	0	0	0	0	0	0	0	0	0	0	0	0	0
2017-04-05 17:13:00	29	17	19	0	0	0	0	0	0	0	0	0	0	0	0	0	0	0	0	0	0	0	0	0	0
2017-04-05 17:13:20	30	19	19	0	0	0	0	0	0	0	0	0	0	0	0	0	0	0	0	0	0	0	0	0	0
2017-04-05 17:13:40	29	18	20	0	0	0	0	0	0	0	0	0	0	0	0	0	0	0	0	0	0	0	0	0	0
2017-04-05 17:14:00	27	18	19	0	0	0	0	0	0	0	0	0	0	0	0	0	0	0	0	0	0	0	0	0	0
2017-04-05 17:14:20	27	20	20	0	0	0	0	0	0	0	0	0	0	0	0	0	0	0	0	0	0	0	0	0	0
2017-04-05 17:14:40	28	18	17	0	0	0	0	0	0	0	0	0	0	0	0	0	0	0	0	0	0	0	0	0	0
2017-04-05 17:15:00	29	20	18	0	0	0	0	0	0	0	0	0	0	0	0	0	0	0	0	0	0	0	0	0	0
2017-04-05 17:15:20	32	18	19	0	0	0	0	0	0	0	0	0	0	0	0	0	0	0	0	0	0	0	0	0	0
2017-04-05 17:15:40	32	19	19	0	0	0	0	0	0	0	0	0	0	0	0	0	0	0	0	0	0	0	0	0	0
2017-04-05 17:16:00	29	18	19	0	0	0	0	0	0	0	0	0	0	0	0	0	0	0	0	0	0	0	0	0	0
	29.6667	18.5333	18.9333	0.133333	0.133333	0.133333	0.133333	0.133333	0.133333	0.133333	0.133333	0.133333	0.133333	0.133333	0.133333	0.133333	0.133333	0.133333	0.133333	0.133333	0.133333	0.133333	0.133333	0.133333	0.133333
2017-04-05 17:16:20	48	20	22	7	2	2	2	2	2	2	2	2	2	2	2	2	2	2	2	2	2	2	2	2	2
2017-04-05 17:16:40	46	17	19	4	0	0	0	0	0	0	0	0	0	0	0	0	0	0	0	0	0	0	0	0	0
2017-04-05 17:17:00	44	15	14	3	0	0	0	0	0	0	0	0	0	0	0	0	0	0	0	0	0	0	0	0	0
2017-04-05 17:17:20	46	7	7	2	0	0	0	0	0	0	0	0	0	0	0	0	0	0	0	0	0	0	0	0	0
2017-04-05 17:17:40	43	20	17	4	0	0	0	0	0	0	0	0	0	0	0	0	0	0	0	0	0	0	0	0	0
2017-04-05 17:18:00	46	17	19	4	0	0	0	0	0	0	0	0	0	0	0	0	0	0	0	0	0	0	0	0	0
2017-04-05 17:18:20	44	12	12	4	0	0	0	0	0	0	0	0	0	0	0	0	0	0	0	0	0	0	0	0	0
2017-04-05 17:18:40	47	0	0	0	0	0	0	0	0	0	0	0	0	0	0	0	0	0	0	0	0	0	0	0	0
2017-04-05 17:19:00	49	2	2	0	0	0	0	0	0	0	0	0	0	0	0	0	0	0	0	0	0	0	0	0	0
2017-04-05 17:19:20	42	20	19	5	0	0	0	0	0	0	0	0	0	0	0	0	0	0	0	0	0	0	0	0	0
2017-04-05 17:19:40	42	17	19	5	0	0	0	0	0	0	0	0	0	0	0	0	0	0	0	0	0	0	0	0	0
2017-04-05 17:20:00	40	18	15	4	0	0	0	0	0	0	0	0	0	0	0	0	0	0	0	0	0	0	0	0	0
2017-04-05 17:20:20	43	19	18	4	0	0	0	0	0	0	0	0	0	0	0	0	0	0	0	0	0	0	0	0	0
2017-04-05 17:20:40	49	9	9	2	0	0	0	0	0	0	0	0	0	0	0	0	0	0	0	0	0	0	0	0	0
2017-04-05 17:21:00	45	0	0	0	0	0	0	0	0	0	0	0	0	0	0	0	0	0	0	0	0	0	0	0	0
	44.9333	12.8667	12.8	3.2	0.133333	0.133333	0.133333	0.133333	0.133333	0.133333	0.133333	0.133333	0.133333	0.133333	0.133333	0.133333	0.133333	0.133333	0.133333	0.133333	0.133333	0.133333	0.133333	0.133333	0.133333
2017-04-05 17:21:20	2	9	7	2	18	2	2	2	2	2	2	2	2	2	2	2	2	2	2	2	2	2	2	2	2
2017-04-05 17:21:40	6	21	20	0	41	0	0	0	0	0	0	0	0	0	0	0	0	0	0	0	0	0	0	0	0
2017-04-05 17:22:00	7	26	19	0	48	0	0	0	0	0	0	0	0	0	0	0	0	0	0	0	0	0	0	0	0
2017-04-05 17:22:20	8	23	20	0	44	0	0	0	0	0	0	0	0	0	0	0	0	0	0	0	0	0	0	0	0
2017-04-05 17:22:40	8	25	20	0	44	0	0	0	0	0	0	0	0	0	0	0	0	0	0	0	0	0	0	0	0
2017-04-05 17:23:00	8	25	20	0	46	0	0	0	0	0	0	0	0	0	0	0	0	0	0	0	0	0	0	0	0
2017-04-05 17:23:20	8	27	19	0	49	0	0	0	0	0	0	0	0	0	0	0	0	0	0	0	0	0	0	0	0
2017-04-05 17:23:40	8	25	19	0	44	0	0	0	0	0	0	0	0	0	0	0	0	0	0	0	0	0	0	0	0
2017-04-05 17:24:00	8	25	20	0	46	0	0	0	0	0	0	0	0	0	0	0	0	0	0	0	0	0	0	0	0
2017-04-05 17:24:20	8	25	18	0	46	0	0	0	0	0	0	0	0	0	0	0	0	0	0	0	0	0	0	0	0
2017-04-05 17:24:40	9	24	21	0	45	0	0	0	0	0	0	0	0	0	0	0	0	0	0	0	0	0	0	0	0
2017-04-05 17:25:00	8	26	21	0	50	0	0	0	0	0	0	0	0	0	0	0	0	0	0	0	0	0	0	0	0
2017-04-05 17:25:20	8	27	21	0	44	0	0	0	0	0	0	0	0	0	0	0	0	0	0	0	0	0	0	0	0
2017-04-05 17:25:40	8	25	22	0	47	0	0	0	0	0	0	0	0	0	0	0	0	0	0	0	0	0	0	0	0
2017-04-05 17:26:00	8	24	19	0	46	0	0	0	0	0	0	0	0	0	0	0	0	0	0	0	0	0	0	0	0
	7.46667	23.8	19.0667	0.133333	43.8667	0.133333	0.133333	0.133333	0.133333	0.133333	0.133333	0.133333	0.133333	0.133333	0.133333	0.133333	0.133333	0.133333	0.133333	0.133333	0.133333	0.133333	0.133333	0.133333	0.133333
2017-04-05 17:26:20	10	18	22	2	47	24	2	2	2	2	2	2	2	2	2	2	2	2	2	2	2	2	2	2	2
2017-04-05 17:26:40	8	16	20	0	44	30	0	0	0	0	0	0	0	0	0	0	0	0	0	0	0	0	0	0	0
2017-04-05 17:27:00	8	20	20	0	42	26	0	0	0	0	0	0	0	0	0	0	0	0	0	0	0	0	0	0	0
2017-04-05 17:27:20	8	18	18	0	45	25	0	0	0	0	0	0	0	0	0	0	0	0	0	0	0	0	0	0	0
2017-04-05 17:27:40	8	17	20	0	43	24	0	0	0	0	0	0	0	0	0	0	0	0	0	0	0	0	0	0	0
2017-04-05 17:28:00	8	15	18	0	46	25	0	0	0	0	0	0	0	0	0	0	0	0	0	0	0	0	0	0	0
2017-04-05 17:28:20	8	14	12	2	35	24	0	0	0	0	0	0	0	0	0	0	0	0	0	0	0	0	0	0	0
2017-04-05 17:28:40	20	19	18	5	26	25	0	0	0	0	0	0	0	0	0	0	0	0	0	0	0	0	0	0	0
2017-04-05 17:29:00	30	11	17	4	25	26	0	0	0	0	0	0	0	0	0	0	0	0	0	0	0	0	0	0	0
2017-04-05 17:29:20	32	12	19	4	25	22	0	0	0	0	0	0	0	0	0	0	0	0	0	0	0	0	0	0	0
2017-04-05 17:29:40	30	19	18	5	26	21	0	0	0	0	0	0	0	0	0	0	0	0	0	0	0	0	0	0	0
2017-04-05 17:30:00	51	19	18	4	25	19	0	0	0	0	0	0	0	0	0	0	0	0	0	0	0	0	0	0	0
2017-04-05 17:30:20	247	13	13	3	22	20	0	0	0	0	0	0	0	0	0	0	0	0	0	0	0	0	0	0	0
2017-04-05 17:30:40	20	12	15	3	24	18	0	0	0	0	0	0	0	0	0	0	0	0	0	0	0	0	0	0	0
2017-04-05 17:31:00	15	18	9	2	21	22	0	0	0	0	0	0	0	0	0	0	0	0	0	0	0	0	0	0	0
	33.5333	16.0667	17.1333	2.26667	33.0667	23.4	0.133333	0.133333	0.133333	0.133333	0.133333	0.133333	0.133333	0.133333	0.133333	0.133333	0.133333	0.133333	0.133333	0.133333	0.133333	0.133333	0.133333	0.133333	0.133333
2017-04-05 17:31:20	42	31	7	3	25	26	4	2	2	2	2	2	2	2	2	2	2	2	2	2	2	2	2	2	2
2017-04-05 17:31:40	40	37	14	3	24	24	3	0	0	0	0	0	0	0	0	0	0	0	0	0	0	0	0	0	0
2017-04-05 17:32:00	41	35	13	3	22	25	3	0	0	0	0	0	0	0	0	0	0	0	0	0	0	0	0	0	0
2017-04-05 17:32:20	40	30	13	2	21	26	3	0	0	0	0	0	0	0	0	0	0	0	0	0	0	0	0	0	0
2017-04-05 17:32:40	43	34	14	3	24	20	4	0	0	0	0	0	0	0	0	0	0	0	0	0	0	0	0	0	0
2017-04-05 17:33:00	45	30	10	2	21	21	5	0	0	0	0	0	0	0	0	0	0	0	0	0	0	0	0	0	0
2017-04-05 17:33:20	44	26	0	0	20	23	4	0	0	0	0	0	0	0	0	0	0	0	0	0	0	0	0	0	0
2017-04-05 17:33:40	42	29	0	0	22	24	4	0	0	0	0	0	0	0	0	0	0	0	0	0	0	0	0	0	0
2017-04-05 17:34:00	44	28	0	0	20	23	4	0	0	0	0	0	0	0	0	0	0	0	0	0	0	0	0	0	0
2017-04-05 17:34:20	40	29	0	0	21	24	4	0	0	0	0	0	0	0	0	0	0	0	0	0	0	0	0	0	0
2017-04-05 17:34:40	42	30	0	0	21	24	5	0	0	0	0	0	0	0	0	0	0	0	0	0	0	0	0	0	0
2017-04-05 17:35:00	42	29	0	0	22	23	5	0	0	0	0	0	0	0	0	0	0	0	0	0	0	0	0	0	0
2017-04-05 17:35:20	45	31	0	0	21	25	4	0	0	0	0	0	0	0	0	0	0	0	0	0	0	0	0	0	0
2017-04-05 17:35:40	42	30	0	0	19	26	4	0	0	0	0	0	0	0	0	0	0	0	0	0	0	0	0	0	0
2017-04-05 17:36:00	38	30	0	0	20	26	4	0	0	0	0	0	0	0	0	0	0	0	0	0	0	0	0	0	0
	42	30.6	4.73333	1.06667	21.5333	24	4	0.133333	0.133333	0.133333	0.133333	0.133333	0.133333	0.133333	0.133333	0.133333	0.133333	0.133333	0.133333	0.133333	0.133333	0.133333	0.133333	0.133333	0.133333
2017-04-05 17:36:20	24	32	21	2	29	14	2	10	2	2	2	2	2	2	2	2	2	2	2	2	2	2	2	2	2
2017-04-05 17:36:40	27	26	18	0	42	15	0	21	0	0	0	0	0	0	0	0	0	0	0	0	0	0	0	0	0
2017-04-05 17:37:00	28	28	19	0	39	16	0	20	0	0	0	0	0	0	0	0	0	0	0	0	0	0	0	0	0
2017-04-05 17:37:20	28	27	19	0	44	16	0	21	0	0	0	0	0	0	0	0	0	0	0	0	0	0	0	0	0
2017-04-05 17:37:40	28	26	18	0	41	15	0	21	0	0	0	0	0	0	0	0	0	0	0	0	0	0	0	0	0
2017-04-05 17:38:00	27	27	18	0	40	15	0	19	0	0	0	0	0	0	0	0	0	0	0	0	0	0	0	0	0
2017-04-05 17:38:20	29	27	16	0	42	15	0	22	0	0	0	0	0	0	0	0	0	0	0	0	0	0	0	0	0
2017-04-05 17:38:40	29	26	20	0	39	16	0	21	0	0	0	0	0	0	0	0	0	0	0	0	0	0	0	0	0
2017-04-05 17:39:00	28	27	19	0	37	15	0	18	0	0	0	0	0	0	0	0	0	0	0	0	0	0	0	0	0
2017-04-05 17:39:20	29	26	17	0	37	15	0	21	0	0	0	0	0	0	0	0	0	0	0	0	0	0	0	0	0
2017-04-05 17:39:40	29	27	18	0	42	15	0	22	0	0	0	0	0	0	0	0	0	0	0	0	0	0	0	0	0
2017-04-05 17:40:00	28	26	17	0	41	15	0	21	0	0	0	0	0	0	0	0	0	0	0	0	0	0	0	0	0
2017-04-05 17:40:20	29	27	17	0	38	15	0	20	0	0	0	0	0	0	0	0	0	0	0	0	0	0	0	0	0
2017-04-05 17:40:40	28	26	19	0	38	14	0	20	0	0	0	0	0	0	0	0	0	0	0	0	0	0	0	0	0
2017-04-05 17:41:00	29	25	18	0	43	14	0	21	0	0	0	0	0	0	0	0	0	0	0	0	0	0	0	0	0
	28	26.8667	18.2667	0.133333	39.4667	15	0.133333	19.8667	0.133333	0.133333	0.133333	0.133333	0.133333	0.133333	0.133333	0.133333	0.133333	0.133333	0.133333	0.133333	0.133333	0.133333	0.133333	0.133333	0.133333
2017-04-05 17:41:20	24	28	21	2	44	8	2	23	5	2	2	2	2	2	2	2	2	2	2	2	2	2	2	2	2
2017-04-05 17:41:40	25	25	20	0	44	8	0	21	5	0	0	0	0	0	0	0	0	0	0	0	0	0	0	0	0
2017-04-05 17:42:00	26	27	18	0	45	9	0	22	5	0	0	0	0	0	0	0	0	0	0	0	0	0	0	0	0
2017-04-05 17:42:20	25	24	18	0	44	9	0	20	5	0	0	0	0	0	0	0	0	0	0	0	0	0	0	0	0
2017-04-05 17:42:40	25	26	18	0	43	9	0	21	5	1	0	0	0	0	0	0	0	0	0	0	0	0	0	0	0
2017-04-05 17:43:00	25	26	18	0	45	11	0	21	5	0	0	0	0	0	0	0	0	0	0	0	0	0	0	0	0
2017-04-05 17:43:20	25	25	18	0	47	10	0	22	5	0	0	0	0	0	0	0	0	0	0	0	0	0	0	0	0
2017-04-05 17:43:40	25	25	19	0	44	9	0	21	5	0	0	0	0	0	0	0	0	0	0	0	0	0	0	0	0
2017-04-05 17:44:00	24	24	18	0	45	9	0	20	5	0	0	0	0	0	0	0	0	0	0	0	0	0	0	0	0
2017-04-05 17:44:20	24	25	18	0	44	9	0	22	5	0	0	0	0	0	0	0	0	0	0	0	0	0	0	0	0
2017-04-05 17:44:40	24	25	19	0	44	9	0	21	5	0	0	0	0	0	0	0	0	0	0	0	0	0	0	0	0
2017-04-05 17:45:00	25	26	18	0	43	9	0	21	5	0	0	0	0	0	0	0	0	0	0	0	0	0	0	0	0
2017-04-05 17:45:20	25	27	19	0	46	9	0	21	5	0	0	0	0	0	0	0	0	0	0	0	0	0	0	0	0
2017-04-05 17:45:40	25	26	19	0	44	8	0	20	5	0	0	0	0	0	0	0	0	0	0	0	0	0	0	0	0
2017-04-05 17:46:00	25	25	18	0	43	8	0	21	5	0	0	0	0	0	0	0	0	0	0	0	0	0	0	0	0
2017-04-05 17:46:20	25	26	18	0	46	8	0	21	5	0	0	0	0	0	0	0	0	0	0	0	0	0	0	0	0
	24.8125	25.625	18.5625	0.125	44.4375	8.875	0.125	21.125	5	0.1875	0.125	0.125	0.125	0.125	0.125	0.125	0.125	0.125	0.125	0.125	0.125	0.125	0.125	0.125	0.125
2017-04-05 17:46:40	9	26	0	0	42	11	0	21	5	0	0	0	0	0	0	0	0	0	0	0	0	0	0	0	0
2017-04-05 17:47:00	13	36	10	2	45	11	2	22	7	17	2	2	2	2	2	2	2	2	2	2	2	2	2	2	2
2017-04-05 17:47:20	15	53	21	0	41	10	0	20	5	39	0	0	0	0	0	0	0	0	0	0	0	0	0	0	0
2017-04-05 17:47:40	16	54	21	0	42	10	0	18	5	36	0	0	0	0	0	0	0	0	0	0	0	0	0	0	0
2017-04-05 17:48:00	17	55	23	0	43	9	0	21	5	38	0	0	0	0	0	0	0	0	0	0	0	0	0	0	0
2017-04-05 17:48:20	15	52	20	0	42	9	0	21	5	40	0	0	0	0	0	0	0	0	0	0	0	0	0	0	0
2017-04-05 17:48:40	16	56	21	0	44	8	0	24	5	41	0	0	0	0	0	0	0	0	0	0	0	0	0	0	0
2017-04-05 17:49:00	17	57	21	0	45	8	0	21	5	40	0	0	0	0	0	0	0	0	0	0	0	0	0	0	0
2017-04-05 17:49:20	17	56	20	0	48	9	0	23	5	40	0	0	0	0	0	0	0	0	0	0	0	0	0	0	0
2017-04-05 17:49:40	4	13	19	0	32	9	0	24	6	24	0	0	0	0	0	0	0	0	0	0	0	0	0	0	0
2017-04-05 17:50:00	0	0	20	0	33	9	0	22	6	25	0	0	0	0	0	0	0	0	0	0	0	0	0	0	0
2017-04-05 17:50:20	0	0	18	0	30	9	0	19	5	21	0	0	0	0	0	0	0	0	0	0	0	0	0	0	0
2017-04-05 17:50:40	0	0	20	0	31	10	0	22	6	26	0	0	0	0	0	0	0	0	0	0	0	0	0	0	0
2017-04-05 17:51:00	0	0	20	0	32	10	0	20	5	23	0	0	0	0	0	0	0	0	0	0	0	0	0	0	0
2017-04-05 17:51:20	0	0	21	0	32	10	0	20	5	24	0	0	0	0	0	0	0	0	0	0	0	0	0	0	0
	9.26667	30.5333	18.3333	0.133333	38.8	9.46667	0.133333	21.2	5.33333	28.9333	0.133333	0.133333	0.133333	0.133333	0.133333	0.133333	0.133333	0.133333	0.133333	0.133333	0.133333	0.133333	0.133333	0.133333	0.133333
2017-04-05 17:51:40	2	2	23	2	32	8	2	24	7	21	4	2	2	2	2	2	2	2	2	2	2	2	2	2	2
2017-04-05 17:52:00	2	54	24	2	46	8	2	20	7	28	20	2	2	2	2	2	2	2	2	2	2	2	2	2	2
2017-04-05 17:52:20	0	56	21	0	48	8	0	20	5	32	18	0	0	0	0	0	0	0	0	0	0	0	0	0	0
2017-04-05 17:52:40	0	58	22	0	41	7	0	20	5	29	22	0	0	0	0	0	0	0	0	0	0	0	0	0	0
2017-04-05 17:53:00	0	63	24	0	44	7	0	22	5	29	23	0	0	0	0	0	0	0	0	0	0	0	0	0	0
2017-04-05 17:53:20	0	58	23	0	42	7	0	23	5	29	24	0	0	0	0	0	0	0	0	0	0	0	0	0	0
2017-04-05 17:53:40	0	57	21	0	46	6	0	21	5	25	17	0	0	0	0	0	0	0	0	0	0	0	0	0	0
2017-04-05 17:54:00	0	63	20	0	50	7	0	20	5	24	19	0	0	0	0	0	0	0	0	0	0	0	0	0	0
2017-04-05 17:54:20	0	62	22	0	46	6	0	21	5	25	19	0	0	0	0	0	0	0	0	0	0	0	0	0	0
2017-04-05 17:54:40	2	61	23	0	38	6	0	21	5	26	23	0	0	0	0	0	0	0	0	0	0	0	0	0	0
2017-04-05 17:55:00	2	1	23	0	32	7	0	20	5	23	1	0	0	0	0	0	0	0	0	0	0	0	0	0	0
2017-04-05 17:55:20	26	0	32	3	33	7	0	24	5	25	1	0	0	0	0	0	0	0	0	0	0	0	0	0	0
2017-04-05 17:55:40	29	0	17	4	29	7	0	19	5	25	1	0	0	0	0	0	0	0	0	0	0	0	0	0	0
2017-04-05 17:56:00	28	0	18	4	29	7	0	20	5	24	1	0	0	0	0	0	0	0	0	0	0	0	0	0	0
2017-04-05 17:56:20	24	0	14	3	31	7	0	24	6	24	1	0	0	0	0	0	0	0	0	0	0	0	0	0	0
	7.66667	35.6667	21.8	1.2	39.1333	7	0.266667	21.2667	5.33333	25.9333	12.9333	0.266667	0.266667	0.266667	0.266667	0.266667	0.266667	0.266667	0.266667	0.266667	0.266667	0.266667	0.266667	0.266667	0.266667
2017-04-05 17:56:40	33	31	20	6	35	5	2	23	7	25	17	3	2	2	2	2	2	2	2	2	2	2	2	2	2
2017-04-05 17:57:00	23	29	19	2	33	5	0	20	5	26	16	0	0	0	0	0	0	0	0	0	0	0	0	0	0
2017-04-05 17:57:20	27	28	16	3	33	7	0	22	5	28	18	0	0	0	0	0	0	0	0	0	0	0	0	0	0
2017-04-05 17:57:40	33	29	21	4	28	7	0	21	5	29	17	0	0	0	0	0	0	0	0	0	0	0	0	0	0
2017-04-05 17:58:00	9	30	15	1	28	7	0	21	5	27	17	0	0	0	0	0	0	0	0	0	0	0	0	0	0
2017-04-05 17:58:20	24	29	17	3	31	9	0	21	5	25	15	0	0	0	0	0	0	0	0	0	0	0	0	0	0
2017-04-05 17:58:40	34	30	23	4	34	9	0	25	6	23	15	0	0	0	0	0	0	0	0	0	0	0	0	0	0
2017-04-05 17:59:00	26	28	16	3	29	8	0	21	5	28	14	0	0	0	0	0	0	0	0	0	0	0	0	0	0
2017-04-05 17:59:20	23	28	16	3	31	8	0	22	5	24	14	0	0	0	0	0	0	0	0	0	0	0	0	0	0
2017-04-05 17:59:40	30	31	17	4	30	8	0	22	5	28	18	0	0	0	0	0	0	0	0	0	0	0	0	0	0
2017-04-05 18:00:00	26	29	16	3	32	7	0	23	6	27	17	0	0	0	0	0	0	0	0	0	0	0	0	0	0
2017-04-05 18:00:20	21	29	14	3	33	7	0	23	6	24	14	0	0	0	0	0	0	0	0	0	0	0	0	0	0
2017-04-05 18:00:40	26	29	16	4	33	7	0	21	5	24	14	0	0	0	0	0	0	0	0	0	0	0	0	0	0
2017-04-05 18:01:00	8	30	20	1	35	6	0	20	5	24	14	0	0	0	0	0	0	0	0	0	0	0	0	0	0
2017-04-05 18:01:20	18	30	16	3	35	6	0	19	5	24	12	0	0	0	0	0	0	0	0	0	0	0	0	0	0
	24.0667	29.3333	17.4667	3.13333	32	7.06667	0.133333	21.6	5.33333	25.7333	15.4667	0.2	0.133333	0.133333	0.133333	0.133333	0.133333	0.133333	0.133333	0.133333	0.133333	0.133333	0.133333	0.133333	0.133333
2017-04-05 18:01:40	27	27	16	4	32	35	1	21	6	30	23	0	20	0	0	0	0	0	0	0	0	0	0	0	0
2017-04-05 18:02:00	22	32	14	4	31	21	1	23	6	30	22	1	19	1	1	1	1	1	1	1	1	1	1	1	1
2017-04-05 18:02:20	25	25	16	3	30	28	1	20	5	30	20	0	20	0	0	0	0	0	0	0	0	0	0	0	0
2017-04-05 18:02:40	21	30	15	3	27	8	0	21	5	29	20	0	18	0	0	0	0	0	0	0	0	0	0	0	0
2017-04-05 18:03:00	0	28	0	0	30	0	0	20	5	29	20	0	18	0	0	0	0	0	0	0	0	0	0	0	0
2017-04-05 18:03:20	0	28	0	0	27	0	0	21	5	30	22	0	15	0	0	0	0	0	0	0	0	0	0	0	0
2017-04-05 18:03:40	5	25	2	0	26	2	0	19	5	28	20	0	12	0	0	0	0	0	0	0	0	0	0	0	0
2017-04-05 18:04:00	29	29	19	4	28	24	0	19	5	28	16	0	10	0	0	0	0	0	0	0	0	0	0	0	0
2017-04-05 18:04:20	15	25	9	2	29	0	0	20	5	29	17	0	11	0	0	0	0	0	0	0	0	0	0	0	0
2017-04-05 18:04:40	0	30	0	0	27	9	1	20	5	27	18	0	10	0	0	0	0	0	0	0	0	0	0	0	0
2017-04-05 18:05:00	20	25	13	4	36	11	22	20	7	27	17	2	12	2	2	2	2	2	2	2	2	2	2	2	2
2017-04-05 18:05:20	34	34	22	4	36	10	20	22	5	27	16	0	17	0	0	0	0	0	0	0	0	0	0	0	0
2017-04-05 18:05:40	25	25	17	3	30	10	0	21	5	29	14	0	16	0	0	0	0	0	0	0	0	0	0	0	0
2017-04-05 18:06:00	12	25	8	1	27	10	0	19	5	29	15	0	17	0	0	0	0	0	0	0	0	0	0	0	0
2017-04-05 18:06:20	0	26	0	0	26	0	0	20	5	29	15	0	17	0	0	0	0	0	0	0	0	0	0	0	0
	15.6667	27.6	10.0667	2.13333	29.4667	11.2	3.06667	20.4	5.26667	28.7333	18.3333	0.2	15.4667	0.2	0.2	0.2	0.2	0.2	0.2	0.2	0.2	0.2	0.2	0.2	0.2
2017-04-05 18:06:40	21	1	2	1	29	1	1	24	7	31	2	1	19	3	1	1	1	1	1	1	1	1	1	1	1
2017-04-05 18:07:00	22	1	19	5	30	10	0	21	5	29	1	0	17	0	0	0	0	0	0	0	0	0	0	0	0
2017-04-05 18:07:20	15	0	7	3	28	9	0	20	5	29	1	0	16	0	1	0	0	0	0	0	0	0	0	0	0
2017-04-05 18:07:40	27	27	17	5	39	7	2	20	6	26	11	2	17	2	2	2	2	2	2	2	2	2	2	2	2
2017-04-05 18:08:00	31	53	21	4	42	9	0	20	5	29	17	0	17	0	0	0	0	0	0	0	0	0	0	0	0
2017-04-05 18:08:20	21	48	14	2	44	5	0	21	4	25	18	0	16	0	0	0	0	0	0	0	0	0	0	0	0
2017-04-05 18:08:40	23	47	15	3	44	4	0	19	5	24	14	0	14	0	0	0	0	0	0	0	0	0	0	0	0
2017-04-05 18:09:00	16	41	8	1	44	10	0	21	4	30	18	0	12	0	0	0	0	0	0	0	0	0	0	0	0
2017-04-05 18:09:20	12	39	6	1	43	5	0	20	5	28	21	0	11	0	0	0	0	0	0	0	0	0	0	0	0
2017-04-05 18:09:40	19	40	0	0	35	0	0	20	5	30	22	0	9	0	0	0	0	0	0	0	0	0	0	0	0
2017-04-05 18:10:00	21	39	0	0	43	0	0	21	5	31	20	0	11	0	0	0	0	0	0	0	0	0	0	0	0
2017-04-05 18:10:20	22	49	13	2	35	10	0	19	5	26	18	0	15	0	0	0	0	0	0	0	0	0	0	0	0
2017-04-05 18:10:40	25	37	0	0	36	0	0	20	4	30	20	0	15	0	0	0	0	0	0	0	0	0	0	0	0
2017-04-05 18:11:00	26	43	3	0	46	9	0	20	5	27	20	0	14	0	0	0	0	0	0	0	0	0	0	0	0
2017-04-05 18:11:20	26	51	18	3	35	15	0	18	4	29	19	0	12	0	0	0	0	0	0	0	0	0	0	0	0
2017-04-05 18:11:40	24	43	1	2	36	2	0	20	5	31	22	0	12	0	0	0	0	0	0	0	0	0	0	0	0
	21.9375	34.9375	9	2	38.0625	6	0.1875	20.25	4.9375	28.4375	15.25	0.1875	14.1875	0.3125	0.25	0.1875	0.1875	0.1875	0.1875	0.1875	0.1875	0.1875	0.1875	0.1875	0.1875
2017-04-05 18:12:00	0	42	0	0	37	22	0	20	5	0	22	0	18	0	0	0	0	0	0	0	0	0	0	0	0
2017-04-05 18:12:20	1	40	1	1	36	17	1	20	6	1	21	1	17	1	1	1	1	1	1	1	1	1	1	1	1
2017-04-05 18:12:40	1	43	23	7	37	15	0	21	6	23	16	0	17	0	45	1	0	0	0	0	0	0	0	0	0
2017-04-05 18:13:00	2	8	24	6	33	16	2	22	7	25	5	2	19	2	41	2	2	2	2	2	2	2	2	2	2
2017-04-05 18:13:20	0	50	19	6	38	18	0	20	5	21	14	0	16	0	50	0	0	0	0	0	0	0	0	0	0
2017-04-05 18:13:40	0	41	22	6	38	14	0	20	5	24	11	0	16	0	48	0	0	0	0	0	0	0	0	0	0
2017-04-05 18:14:00	0	0	22	5	33	15	0	20	5	27	1	0	14	0	40	0	0	0	0	0	0	0	0	0	0
2017-04-05 18:14:20	0	0	23	5	32	19	0	21	5	25	1	0	14	0	39	0	0	0	0	0	0	0	0	0	0
2017-04-05 18:14:40	0	1	22	5	33	17	0	19	5	24	2	0	15	0	37	0	0	0	0	0	0	0	0	0	0
2017-04-05 18:15:00	2	32	22	8	39	12	2	23	7	23	11	2	12	2	45	2	2	2	2	2	2	2	2	2	2
2017-04-05 18:15:20	0	54	21	6	42	12	0	20	5	26	18	0	12	0	53	0	0	0	0	0	0	0	0	0	0
2017-04-05 18:15:40	0	53	21	6	41	14	0	22	5	25	7	0	14	0	54	0	0	0	0	0	0	0	0	0	0
2017-04-05 18:16:00	0	55	20	6	42	15	0	19	4	21	15	0	12	0	52	0	0	0	0	0	0	0	0	0	0
2017-04-05 18:16:20	0	53	22	6	51	15	0	23	5	23	21	0	12	0	51	0	0	0	0	0	0	0	0	0	0
2017-04-05 18:16:40	0	55	21	6	42	16	0	22	5	24	22	0	12	0	46	0	0	0	0	0	0	0	0	0	0
	0.4	35.1333	18.8667	5.26667	38.2667	15.8	0.333333	20.8	5.33333	20.8	12.4667	0.333333	14.6667	0.333333	40.1333	0.4	0.333333	0.333333	0.333333	0.333333	0.333333	0.333333	0.333333	0.333333	0.333333
2017-04-05 18:17:00	0	44	20	5	43	15	0	19	4	23	12	0	18	0	53	0	0	0	0	0	0	0	0	0	0
2017-04-05 18:17:20	2	47	19	4	42	14	2	22	7	25	18	2	17	2	52	12	2	2	2	2	2	2	2	2	2
2017-04-05 18:17:40	0	38	21	5	38	15	0	23	4	23	19	0	15	0	60	20	0	0	0	0	0	0	0	0	0
2017-04-05 18:18:00	0	44	21	5	39	17	0	23	5	22	19	0	20	0	73	18	0	0	0	0	0	0	0	0	0
2017-04-05 18:18:20	0	44	21	5	38	19	0	25	5	23	18	0	18	0	60	20	0	0	0	0	0	0	0	0	0
2017-04-05 18:18:40	0	45	22	3	42	17	0	23	4	21	13	0	16	0	60	16	0	0	0	0	0	0	0	0	0
2017-04-05 18:19:00	0	35	19	3	40	15	0	20	4	18	11	0	14	0	37	18	0	0	0	0	0	0	0	0	0
2017-04-05 18:19:20	0	37	19	3	37	15	0	20	4	14	12	0	14	0	31	17	0	0	0	0	0	0	0	0	0
2017-04-05 18:19:40	0	36	18	3	38	12	0	22	5	17	16	0	13	0	48	20	0	0	0	0	0	0	0	0	0
2017-04-05 18:20:00	0	39	18	4	39	9	0	19	4	18	15	0	10	0	44	19	0	0	0	0	0	0	0	0	0
2017-04-05 18:20:20	0	35	18	4	34	11	0	21	4	15	15	0	12	0	38	18	0	0	0	0	0	0	0	0	0
2017-04-05 18:20:40	0	37	19	4	36	11	0	21	4	19	17	0	11	0	45	18	0	0	0	0	0	0	0	0	0
2017-04-05 18:21:00	0	33	19	4	36	10	0	20	5	14	8	0	13	0	43	18	0	0	0	0	0	0	0	0	0
2017-04-05 18:21:20	0	28	20	4	36	10	0	20	4	18	16	0	13	0	41	16	0	0	0	0	0	0	0	0	0
2017-04-05 18:21:40	0	0	17	4	30	13	0	23	5	19	1	0	11	0	45	17	0	0	0	0	0	0	0	0	0
	0.133333	36.1333	19.4	4	37.8667	13.5333	0.133333	21.4	4.53333	19.2667	14	0.133333	14.3333	0.133333	48.6667	16.4667	0.133333	0.133333	0.133333	0.133333	0.133333	0.133333	0.133333	0.133333	0.133333
2017-04-05 18:22:00	2	2	23	7	32	39	2	23	7	20	3	2	22	2	50	20	3	2	2	2	2	2	2	2	2
2017-04-05 18:22:20	0	1	19	5	31	37	0	20	5	19	2	0	19	0	40	19	0	0	0	0	0	0	0	0	0
2017-04-05 18:22:40	2	54	20	8	40	38	1	22	6	19	19	1	17	1	40	19	1	1	1	1	1	1	1	1	1
2017-04-05 18:23:00	0	54	20	6	41	39	0	22	4	17	19	0	15	0	48	20	0	0	0	0	0	0	0	0	0
2017-04-05 18:23:20	0	49	21	6	44	41	0	21	4	15	15	0	15	0	46	21	0	0	0	0	0	0	0	0	0
2017-04-05 18:23:40	0	51	17	6	44	41	0	20	4	17	10	0	16	0	38	15	0	0	0	0	0	0	0	0	0
2017-04-05 18:24:00	0	50	22	6	49	47	0	21	4	20	9	0	14	0	40	17	0	0	0	0	0	0	0	0	0
2017-04-05 18:24:20	0	55	20	6	45	45	0	21	5	18	20	0	20	0	48	18	0	0	0	0	0	0	0	0	0
2017-04-05 18:24:40	0	55	20	6	53	43	0	23	5	17	10	0	16	0	41	19	0	0	0	0	0	0	0	0	0
2017-04-05 18:25:00	0	24	19	5	28	30	0	20	4	17	10	0	14	0	43	19	0	0	0	0	0	0	0	0	0
2017-04-05 18:25:20	0	0	18	4	28	30	0	20	5	15	1	0	17	0	39	17	0	0	0	0	0	0	0	0	0
2017-04-05 18:25:40	0	0	20	5	30	29	0	24	5	22	1	0	15	0	48	17	0	0	0	0	0	0	0	0	0
2017-04-05 18:26:00	0	0	18	5	30	29	0	22	5	14	1	0	15	0	35	19	0	0	0	0	0	0	0	0	0
2017-04-05 18:26:20	0	0	19	5	30	28	0	20	5	19	1	0	16	0	40	19	0	0	0	0	0	0	0	0	0
2017-04-05 18:26:40	0	0	20	5	30	28	0	21	5	19	1	0	16	0	42	17	0	0	0	0	0	0	0	0	0
2017-04-05 18:27:00	0	0	20	5	30	28	0	21	5	15	1	0	17	0	36	18	0	0	0	0	0	0	0	0	0
	0.25	24.6875	19.75	5.625	36.5625	35.75	0.1875	21.3125	4.875	17.6875	7.6875	0.1875	16.5	0.1875	42.125	18.375	0.25	0.1875	0.1875	0.1875	0.1875	0.1875	0.1875	0.1875	0.1875
2017-04-05 18:27:20	9	1	19	6	30	22	1	21	6	16	2	1	17	1	41	22	1	9	1	1	1	1	1	1	1
2017-04-05 18:27:40	10	1	19	5	29	25	0	21	5	18	1	0	13	0	37	18	0	9	0	0	0	0	0	0	0
2017-04-05 18:28:00	8	0	20	5	28	24	0	21	5	17	1	0	15	0	42	16	0	10	0	0	0	0	0	0	0
2017-04-05 18:28:20	6	31	21	8	37	28	2	23	7	20	11	2	15	2	40	22	2	9	2	2	2	2	2	2	2
2017-04-05 18:28:40	8	51	19	6	37	24	0	19	4	20	17	0	14	0	50	18	0	7	0	0	0	0	0	0	0
2017-04-05 18:29:00	7	55	22	6	54	22	0	23	5	21	22	0	18	0	59	20	0	8	0	0	0	0	0	0	0
2017-04-05 18:29:20	7	51	25	7	52	26	0	24	5	24	22	0	20	0	63	22	0	6	0	0	0	0	0	0	0
2017-04-05 18:29:40	5	54	23	6	48	23	0	22	5	19	20	0	16	0	46	20	0	9	0	0	0	0	0	0	0
2017-04-05 18:30:00	6	46	17	6	42	24	0	22	4	15	14	0	15	0	36	19	0	8	0	0	0	0	0	0	0
2017-04-05 18:30:20	6	0	18	5	31	23	0	20	4	14	1	0	14	0	35	20	0	6	0	0	0	0	0	0	0
2017-04-05 18:30:40	7	0	20	5	30	25	0	20	5	21	1	0	11	0	37	17	0	6	0	0	0	0	0	0	0
2017-04-05 18:31:00	5	0	19	5	34	24	0	23	5	23	1	0	13	0	48	18	0	5	0	0	0	0	0	0	0
2017-04-05 18:31:20	5	0	19	5	25	23	0	20	5	20	1	0	10	0	51	19	0	7	0	0	0	0	0	0	0
2017-04-05 18:31:40	7	0	22	5	32	25	0	24	5	23	1	0	13	0	51	20	0	7	0	0	0	0	0	0	0
2017-04-05 18:32:00	7	0	21	5	27	26	0	20	5	21	1	0	14	0	44	19	0	7	0	0	0	0	0	0	0
	6.86667	19.3333	20.2667	5.66667	35.7333	24.2667	0.2	21.5333	5	19.4667	7.73333	0.2	14.5333	0.2	45.3333	19.3333	0.2	7.53333	0.2	0.2	0.2	0.2	0.2	0.2	0.2
2017-04-05 18:32:20	11	2	23	7	34	13	2	22	7	24	3	2	13	2	52	20	2	15	4	2	2	2	2	2	2
2017-04-05 18:32:40	8	0	21	5	31	11	0	19	5	19	1	0	21	0	47	20	0	18	0	0	0	0	0	0	0
2017-04-05 18:33:00	7	26	21	7	38	12	2	22	7	20	11	2	12	2	43	22	2	13	2	2	2	2	2	2	2
2017-04-05 18:33:20	7	57	19	6	44	14	0	20	4	15	18	0	15	0	43	18	0	11	0	0	0	0	0	0	0
2017-04-05 18:33:40	6	45	20	7	46	13	0	21	4	21	7	0	13	0	44	19	0	12	0	0	0	0	0	0	0
2017-04-05 18:34:00	8	51	22	7	51	13	0	22	5	19	15	0	13	0	41	19	0	12	0	0	0	0	0	0	0
2017-04-05 18:34:20	8	53	19	6	51	10	0	21	5	18	11	0	20	0	45	20	0	11	0	0	0	0	0	0	0
2017-04-05 18:34:40	8	54	21	7	50	11	0	24	5	17	16	0	21	0	47	21	0	11	0	0	0	0	0	0	0
2017-04-05 18:35:00	11	25	19	5	36	19	0	23	4	19	8	0	19	0	50	19	0	19	0	0	0	0	0	0	0
2017-04-05 18:35:20	11	0	19	5	30	19	0	20	5	18	1	0	19	0	41	19	0	18	0	0	0	0	0	0	0
2017-04-05 18:35:40	9	0	19	5	30	10	0	20	5	18	1	0	10	0	46	20	0	10	0	0	0	0	0	0	0
2017-04-05 18:36:00	9	0	20	5	30	9	0	19	5	19	1	0	9	0	40	19	0	9	0	0	0	0	0	0	0
2017-04-05 18:36:20	9	0	20	5	33	9	0	20	5	21	1	0	11	0	45	19	0	9	0	0	0	0	0	0	0
2017-04-05 18:36:40	9	0	20	5	32	10	0	19	5	23	1	0	10	0	48	20	0	9	0	0	0	0	0	0	0
	8.64286	22.3571	20.2143	5.85714	38.2857	12.3571	0.285714	20.8571	5.07143	19.3571	6.78571	0.285714	14.7143	0.285714	45.1429	19.6429	0.285714	12.6429	0.428571	0.285714	0.285714	0.285714	0.285714	0.285714	0.285714
2017-04-05 18:37:00	7	19	17	5	31	10	0	19	5	22	8	0	15	0	43	19	0	15	0	0	0	0	0	0	0
2017-04-05 18:37:20	7	20	20	5	31	10	0	22	5	18	8	0	12	0	40	17	0	17	0	0	0	0	0	0	0
2017-04-05 18:37:40	8	22	21	7	37	9	2	31	7	25	7	2	14	2	47	21	2	14	2	20	2	2	2	2	2
2017-04-05 18:38:00	8	21	21	5	44	9	0	42	5	22	7	0	14	0	49	20	0	14	0	35	0	0	0	0	0
2017-04-05 18:38:20	7	24	19	5	44	11	0	38	4	19	8	0	15	0	43	20	0	15	0	36	0	0	0	0	0
2017-04-05 18:38:40	10	23	19	5	45	12	0	39	4	20	8	0	13	0	45	19	0	16	0	37	0	0	0	0	0
2017-04-05 18:39:00	10	22	20	5	41	12	0	40	4	19	9	0	16	0	47	20	0	16	0	39	0	0	0	0	0
2017-04-05 18:39:20	8	21	20	5	48	8	0	41	5	20	6	0	16	0	44	19	0	16	0	35	0	0	0	0	0
2017-04-05 18:39:40	9	22	21	5	45	11	0	39	5	23	9	0	12	0	45	18	0	12	0	40	0	0	0	0	0
2017-04-05 18:40:00	9	18	16	3	46	11	0	41	5	16	9	0	14	0	36	13	0	14	0	42	0	0	0	0	0
2017-04-05 18:40:20	11	23	22	5	48	8	0	43	4	21	8	0	18	0	48	21	0	18	0	37	0	0	0	0	0
2017-04-05 18:40:40	9	23	21	5	49	8	0	39	5	20	8	0	18	0	48	19	0	18	0	41	0	0	0	0	0
2017-04-05 18:41:00	8	23	21	5	49	8	0	44	5	23	8	0	16	0	49	18	0	17	0	40	0	0	0	0	0
2017-04-05 18:41:20	10	20	20	5	50	14	0	47	5	20	6	0	18	0	47	17	0	20	0	50	0	0	0	0	0
2017-04-05 18:41:40	8	19	18	4	50	9	0	42	5	14	7	0	14	0	36	17	0	14	0	41	0	0	0	0	0
2017-04-05 18:42:00	8	24	20	4	50	9	0	43	4	18	7	0	14	0	38	17	0	14	0	42	0	0	0	0	0
2017-04-05 18:42:20	8	24	23	5	45	9	0	40	5	26	7	0	16	0	51	19	0	16	0	43	0	0	0	0	0
	8.52941	21.6471	19.9412	4.88235	44.2941	9.88235	0.117647	38.2353	4.82353	20.3529	7.64706	0.117647	15	0.117647	44.4706	18.4706	0.117647	15.6471	0.117647	34	0.117647	0.117647	0.117647	0.117647	0.117647
2017-04-05 18:42:40	12	24	23	7	48	17	2	44	6	24	15	2	17	2	51	21	2	19	2	41	25	2	2	2	2
2017-04-05 18:43:00	11	32	19	5	46	18	0	42	5	21	13	0	16	0	55	19	0	18	0	43	23	0	0	0	0
2017-04-05 18:43:20	9	29	20	5	46	19	0	43	5	21	12	0	14	0	48	19	0	19	0	43	23	0	0	0	0
2017-04-05 18:43:40	11	30	14	3	45	15	0	41	4	15	13	0	12	0	34	12	0	15	0	42	22	0	0	0	0
2017-04-05 18:44:00	10	28	19	4	40	16	0	41	4	18	11	0	11	0	38	15	0	16	0	40	20	0	0	0	0
2017-04-05 18:44:20	9	25	20	4	40	17	0	45	5	19	13	0	13	0	47	19	0	17	0	46	20	0	0	0	0
2017-04-05 18:44:40	10	24	17	4	45	15	0	44	5	15	15	0	15	0	32	14	0	15	0	43	20	0	0	0	0
2017-04-05 18:45:00	11	26	18	4	40	16	0	40	4	16	14	0	16	0	37	15	0	16	0	42	20	0	0	0	0
2017-04-05 18:45:20	8	27	0	0	41	14	0	41	4	0	14	0	16	0	1	0	0	14	0	37	21	0	0	0	0
2017-04-05 18:45:40	9	26	0	0	45	12	0	44	5	0	12	0	15	0	1	0	0	13	0	42	22	0	0	0	0
2017-04-05 18:46:00	9	25	0	0	45	16	0	43	5	0	16	0	16	0	1	0	0	16	0	42	22	0	0	0	0
2017-04-05 18:46:20	8	27	0	0	39	18	0	43	4	0	15	0	15	0	1	0	0	15	0	39	19	0	0	0	0
2017-04-05 18:46:40	8	27	0	0	44	20	0	45	4	0	13	0	14	0	0	0	0	17	0	41	18	0	0	0	0
2017-04-05 18:47:00	7	28	0	0	41	14	0	41	4	0	13	0	14	0	1	0	0	14	0	41	18	0	0	0	0
	9.42857	27	10.7143	2.57143	43.2143	16.2143	0.142857	42.6429	4.57143	10.6429	13.5	0.142857	14.5714	0.142857	24.7857	9.57143	0.142857	16	0.142857	41.5714	20.9286	0.142857	0.142857	0.142857	0.142857
2017-04-05 18:47:20	11	9	14	4	46	26	4	46	11	12	6	4	20	4	20	20	4	21	4	47	20	11	4	4	4
2017-04-05 18:47:40	9	35	15	0	55	22	0	40	5	11	18	0	16	0	21	15	0	16	0	50	21	5	0	0	0
2017-04-05 18:48:00	9	48	14	0	51	24	0	40	6	11	18	0	14	0	19	15	0	14	0	53	22	5	0	0	0
2017-04-05 18:48:20	9	34	12	0	54	22	0	42	5	11	18	0	14	0	19	16	0	14	0	49	22	5	0	0	0
2017-04-05 18:48:40	9	50	12	0	45	25	0	41	5	10	18	0	13	0	18	18	0	15	0	47	22	5	0	0	0
2017-04-05 18:49:00	6	38	14	0	55	23	0	42	6	7	19	0	15	0	20	17	0	15	0	49	20	5	0	0	0
2017-04-05 18:49:20	6	38	14	0	55	23	0	41	5	7	8	0	15	0	20	17	0	15	0	52	20	5	0	0	0
2017-04-05 18:49:40	6	37	14	0	47	23	0	41	6	7	18	0	15	0	21	20	0	15	0	50	21	5	0	0	0
2017-04-05 18:50:00	6	35	12	0	49	22	0	42	6	7	17	0	12	0	22	18	0	13	0	53	22	5	0	0	0
2017-04-05 18:50:20	6	30	12	0	39	21	0	40	5	7	10	0	12	0	22	18	0	13	0	42	22	4	0	0	0
2017-04-05 18:50:40	7	36	14	0	51	22	0	42	5	8	14	0	14	0	19	17	0	14	0	53	24	5	0	0	0
2017-04-05 18:51:00	7	34	12	0	55	20	0	40	6	8	15	0	14	0	19	17	0	14	0	53	24	5	0	0	0
2017-04-05 18:51:20	7	35	12	0	59	22	0	42	6	8	18	0	14	0	19	17	0	14	0	52	23	5	0	0	0
2017-04-05 18:51:40	5	35	13	0	53	20	0	40	6	6	12	0	16	0	20	18	0	16	0	51	20	5	0	0	0
2017-04-05 18:52:00	5	30	13	0	49	22	0	41	5	6	13	0	16	0	20	18	0	16	0	49	20	5	0	0	0
2017-04-05 18:52:20	5	59	11	0	54	19	0	39	5	6	14	0	15	0	22	17	0	15	0	44	22	5	0	0	0
2017-04-05 18:52:40	5	27	11	0	47	19	0	39	6	6	1	0	14	0	22	17	0	15	0	37	22	5	0	0	0
	6.94118	35.8824	12.8824	0.235294	50.8235	22.0588	0.235294	41.0588	5.82353	8.11765	13.9412	0.235294	14.6471	0.235294	20.1765	17.3529	0.235294	15	0.235294	48.8824	21.5882	5.29412	0.235294	0.235294	0.235294
2017-04-05 18:53:00	8	20	16	2	42	23	2	40	7	17	20	2	17	2	23	20	2	17	2	37	27	6	23	2	2
2017-04-05 18:53:20	7	23	16	0	39	25	0	44	6	17	19	0	17	0	25	18	0	17	0	37	25	5	25	0	0
2017-04-05 18:53:40	7	25	16	0	45	25	0	39	6	16	20	0	16	0	25	20	0	16	0	38	25	5	25	0	0
2017-04-05 18:54:00	7	25	15	0	40	22	0	38	6	15	20	0	15	0	22	20	0	15	0	36	23	5	22	0	0
2017-04-05 18:54:20	7	27	17	0	43	22	0	40	6	17	20	0	17	0	22	20	0	15	0	36	26	5	22	0	0
2017-04-05 18:54:40	6	26	15	0	43	20	0	39	6	14	22	0	14	0	22	20	0	15	0	37	24	5	22	0	0
2017-04-05 18:55:00	6	24	15	0	45	20	0	41	6	14	23	0	14	0	20	20	0	15	0	39	27	5	24	0	0
2017-04-05 18:55:20	6	30	10	0	40	18	0	40	6	10	19	0	14	0	20	18	0	16	0	34	30	5	24	0	0
2017-04-05 18:55:40	9	28	10	0	39	18	0	40	5	10	17	0	14	0	20	18	0	16	0	39	28	5	22	0	0
2017-04-05 18:56:00	8	23	9	0	46	18	0	38	6	10	17	0	15	0	20	18	0	16	0	43	22	5	22	0	0
2017-04-05 18:56:20	8	23	9	0	44	19	0	40	6	10	17	0	15	0	20	18	0	16	0	40	22	5	22	0	0
2017-04-05 18:56:40	7	22	9	0	35	20	0	42	6	8	16	0	10	0	21	18	0	15	0	31	23	5	23	0	0
2017-04-05 18:57:00	7	22	10	0	29	20	0	42	6	9	16	0	16	0	21	16	0	19	0	25	23	5	23	0	0
2017-04-05 18:57:20	7	23	10	1	34	19	1	42	7	9	16	1	16	1	21	16	1	19	1	24	23	6	23	1	1
	7.14286	24.3571	12.6429	0.214286	40.2857	20.6429	0.214286	40.3571	6.07143	12.5714	18.7143	0.214286	15	0.214286	21.5714	18.5714	0.214286	16.2143	0.214286	35.4286	24.8571	5.14286	23	0.214286	0.214286
2017-04-05 18:57:40	19	25	58	3	42	23	3	47	9	21	25	3	14	3	30	17	3	58	3	37	26	7	30	4	3
2017-04-05 18:58:00	18	25	52	0	40	23	0	32	3	15	25	0	15	0	25	17	0	52	0	33	26	2	30	0	0
2017-04-05 18:58:20	16	22	54	0	39	20	0	42	5	13	19	0	12	0	27	15	0	54	0	32	21	4	21	0	0
2017-04-05 18:58:40	15	22	9	0	34	20	0	38	6	7	19	0	12	0	22	13	0	7	0	29	21	4	21	0	0
2017-04-05 18:59:00	15	22	9	0	35	20	0	39	6	7	19	0	18	0	20	15	0	0	0	24	22	5	22	0	0
2017-04-05 18:59:20	13	21	0	0	35	19	0	41	6	7	23	0	18	0	20	15	0	0	0	25	22	5	23	0	0
2017-04-05 18:59:40	15	24	15	0	33	24	0	41	6	12	24	0	20	0	24	15	0	1	0	24	25	5	19	0	0
2017-04-05 19:00:00	19	22	0	0	41	22	0	41	6	12	22	0	19	0	22	17	0	0	0	38	22	5	19	0	0
2017-04-05 19:00:20	17	24	0	0	41	25	0	41	6	12	25	0	18	0	21	17	0	0	0	35	23	5	24	0	0
2017-04-05 19:00:40	15	24	0	0	42	25	0	35	6	14	25	0	12	0	21	15	0	0	0	31	23	5	24	0	0
2017-04-05 19:01:00	15	22	0	0	38	21	0	37	6	13	21	0	12	0	19	12	0	0	0	28	23	5	21	0	0
2017-04-05 19:01:20	12	23	0	0	38	21	0	40	6	13	21	0	14	0	19	12	0	0	0	23	23	5	21	0	0
2017-04-05 19:01:40	11	23	0	0	36	21	0	37	6	15	21	0	14	0	21	11	0	0	0	23	23	4	21	0	0
2017-04-05 19:02:00	16	21	15	0	36	19	0	38	6	15	22	0	15	0	19	16	0	7	0	33	21	5	22	0	0
2017-04-05 19:02:20	15	19	15	2	36	19	2	44	8	7	19	2	15	2	19	15	2	15	2	30	20	7	22	2	2
2017-04-05 19:02:40	18	19	50	0	42	19	0	41	5	7	19	0	15	0	19	18	0	50	0	37	19	4	22	0	0
2017-04-05 19:03:00	19	19	57	0	43	19	0	42	6	7	19	0	16	0	19	19	0	57	0	35	19	5	22	0	0
	15.7647	22.1765	19.6471	0.294118	38.2941	21.1765	0.294118	39.7647	6	11.5882	21.6471	0.294118	15.2353	0.294118	21.5882	15.2353	0.294118	17.7059	0.294118	30.4118	22.2941	4.82353	22.5882	0.352941	0.294118
2017-04-05 19:03:20	11	52	21	2	43	27	2	41	8	7	24	2	21	2	23	22	2	17	2	35	31	6	27	2	41
2017-04-05 19:03:40	7	55	17	0	39	26	0	40	5	9	23	0	17	0	22	16	0	19	0	43	27	4	24	0	39
2017-04-05 19:04:00	7	48	10	0	36	26	0	41	5	11	23	0	10	0	22	12	0	21	0	33	20	4	24	0	34
2017-04-05 19:04:20	7	57	18	0	37	26	0	44	6	8	22	0	18	0	21	16	0	18	0	30	26	4	22	0	36
2017-04-05 19:04:40	8	54	19	0	41	26	0	42	6	8	23	0	19	0	22	20	0	17	0	33	26	4	26	0	39
2017-04-05 19:05:00	7	50	17	0	32	24	0	42	6	7	23	0	17	0	23	15	0	17	0	31	27	4	26	0	39
2017-04-05 19:05:20	11	51	15	0	29	26	0	40	6	8	21	0	15	0	23	16	0	18	0	29	26	4	20	0	33
2017-04-05 19:05:40	11	27	9	0	30	24	0	39	5	8	21	0	14	0	22	15	0	18	0	28	19	4	24	0	30
2017-04-05 19:06:00	8	0	6	0	26	24	0	39	6	8	24	0	19	0	24	14	0	18	0	20	16	4	24	0	26
2017-04-05 19:06:20	8	1	2	0	27	26	0	42	6	10	24	0	22	0	24	15	0	19	0	20	21	5	25	0	26
2017-04-05 19:06:40	8	55	14	1	36	27	1	44	7	10	22	1	14	1	23	15	1	19	1	31	24	6	25	1	24
	8.45455	40.9091	13.4545	0.272727	34.1818	25.6364	0.272727	41.2727	6	8.54545	22.7273	0.272727	16.9091	0.272727	22.6364	16	0.272727	18.2727	0.272727	30.2727	23.9091	4.45455	24.2727	0.272727	33.3636

## Sheet: Bandwidth Utilization 
	Date	192.168.2.61 Inbound	192.168.2.61 Outbound	192.168.2.62 Inbound	192.168.2.62 Outbound	192.168.2.63 Inbound	192.168.2.63 Outbound	192.168.2.64 Inbound	192.168.2.64 Outbound	192.168.2.65 Inbound	192.168.2.65 Outbound	192.168.2.66 Inbound	192.168.2.66 Outbound	192.168.2.67 Inbound	192.168.2.67 Outbound	192.168.2.68 Inbound	192.168.2.68 Outbound	192.168.2.69 Inbound	192.168.2.69 Outbound	192.168.2.70 Inbound	192.168.2.70 Outbound	192.168.2.71 Inbound	192.168.2.71 Outbound	192.168.2.72 Inbound	192.168.2.72 Outbound	192.168.2.73 Inbound	192.168.2.73 Outbound	192.168.2.74 Inbound	192.168.2.74 Outbound	192.168.2.75 Inbound	192.168.2.75 Outbound	192.168.2.76 Inbound	192.168.2.76 Outbound	192.168.2.77 Inbound	192.168.2.77 Outbound	192.168.2.78 Inbound	192.168.2.78 Outbound	192.168.2.79 Inbound	192.168.2.79 Outbound	192.168.2.80 Inbound	192.168.2.80 Outbound	192.168.2.81 Inbound	192.168.2.81 Outbound	192.168.2.82 Inbound	192.168.2.82 Outbound	192.168.2.83 Inbound	192.168.2.83 Outbound	192.168.2.84 Inbound	192.168.2.84 Outbound
	2017-04-04 12:15:00	22658.4	46693.5	9097.73	49525	2662.03	18431.1	12996.9	63767.1	13262.6	61615.1	8591.51	46914	3487.07	6949.49	8853.74	44876.9	3951.51	6705.01	1917.46	4128.76	6227.12	26510.9	0	0	0	0	0	0	0	0	0	0	0	0	0	0	0	0	0	0	0	0	0	0	0	0	0	0
	2017-04-04 12:20:00	10257.5	19332.6	7632.54	38589.9	1461.49	9029.09	12782.6	56227.3	12760.9	56097.9	7479.35	38600.7	3324.76	13021.3	7890.92	37160	2937.64	4405.48	1115.31	2105.82	794.668	861.222	0	0	0	0	0	0	0	0	0	0	0	0	0	0	0	0	0	0	0	0	0	0	0	0	0	0
	2017-04-04 12:25:00	1519.22	2469.55	6695.49	33504.4	591.008	1097.42	11269.4	48161	13197.4	55701.6	6711.07	33158.8	3233.83	19437.4	6940.98	33664.9	2066.75	2932.66	538.278	335.583	3760.15	17575.6	0	0	0	0	0	0	0	0	0	0	0	0	0	0	0	0	0	0	0	0	0	0	0	0	0	0
	2017-04-04 12:30:00	124.754	646.876	6591.65	32140.9	587.045	238.832	11370.1	49446.2	12981.3	54548.6	6765.06	33385.7	3317.44	21026.8	6905.86	32232.5	2050.16	2759.86	578.104	139.599	5747.73	24836.6	1245.8	1735.55	0	0	0	0	0	0	0	0	0	0	0	0	0	0	0	0	0	0	0	0	0	0	0	0
	2017-04-04 12:35:00	86.5137	788.709	6151.64	30890.6	286.556	137.083	9345.04	38858.5	11174.4	45725.1	6438.85	32471.9	2887.61	20037.4	6483.59	31090	1685.52	2421	284.346	130.456	665.76	685.33	1795.35	3013.84	0	0	0	0	0	0	0	0	0	0	0	0	0	0	0	0	0	0	0	0	0	0	0	0
	2017-04-04 12:40:00	365.779	1757.8	6057.51	31518	286.879	141.292	9709.54	40408.9	11664.2	48184.3	6213.59	31987.2	2924.89	20229.8	6488.27	31019.6	1675.61	2393.28	283.796	133.286	601.715	364.842	1857.85	3270.73	0	0	0	0	0	0	0	0	0	0	0	0	0	0	0	0	0	0	0	0	0	0	0	0
	2017-04-04 12:45:00	1688.11	8476.14	8442.19	24805.4	1800.57	6241.64	6107.52	23352	7227.71	25123.2	4468.36	17676.9	3518.87	12119.7	4456.69	17939.4	2003.23	2476.11	1143.78	755.311	1304.18	260.028	3253.04	4574.45	0	0	0	0	0	0	0	0	0	0	0	0	0	0	0	0	0	0	0	0	0	0	0	0
	2017-04-04 12:50:00	10810.1	60031.4	10793.3	53563.3	5860.09	31570.2	13727.1	62952.8	17304.3	82506.3	6586.38	33080.1	3609.65	5661.92	8875.94	47155.1	4731.4	7390.34	2911.56	4221.93	5768.07	25851.8	3304.19	4802.98	3236.09	13448.1	0	0	0	0	0	0	0	0	0	0	0	0	0	0	0	0	0	0	0	0	0	0
	2017-04-04 12:55:00	6230.59	25595.3	8692.74	46210.6	2162.81	12356.1	12712.6	61293.4	12802.2	62057.3	1456.29	5237.65	1038.64	2276.42	8486.81	41459.6	3918.4	5750.69	1688.55	2663.68	6447.64	31166	2859.76	4509.86	5433.18	29349.3	0	0	0	0	0	0	0	0	0	0	0	0	0	0	0	0	0	0	0	0	0	0
	2017-04-04 13:00:00	154.524	425.161	6296.55	33935.5	251.971	252.631	8239.41	38258.8	9622.68	41634.3	255.442	184.608	258.987	545.086	1477.63	5543.4	2263.34	3400.25	13909.5	609.497	675.868	801.03	1872.91	3464.44	6145.66	32882.2	0	0	0	0	0	0	0	0	0	0	0	0	0	0	0	0	0	0	0	0	0	0
	2017-04-04 13:05:00	774.303	4591.14	6126.26	33126.3	1019.79	4113.27	6290.79	26569.4	7561.93	29883.8	346.405	138.842	338.414	142.371	505.498	327.586	1896.37	2697.97	934.37	1163.77	632.42	341.307	1905.61	3359.83	5527.84	26816.5	0	0	0	0	0	0	0	0	0	0	0	0	0	0	0	0	0	0	0	0	0	0
	2017-04-04 13:10:00	2822.44	11668.7	6231.1	34199.9	2448.48	11555.2	5063.5	19346.6	5821.56	20832.6	358.124	157.301	343.925	132.789	532.676	283.938	1861.2	2566.62	1538.66	3083.91	576.708	302.002	2046.96	3605.55	825.276	2589.08	2019.15	3279.69	0	0	0	0	0	0	0	0	0	0	0	0	0	0	0	0	0	0	0	0
	2017-04-04 13:15:00	85.0899	474.266	6462.47	34141.8	501.67	212.2	10831.2	54610.2	14528.5	66797.9	3653.97	18826.2	1940.56	9956.69	4867.33	25668.7	2034.09	3054.98	499.098	159.142	9346.87	45619.1	2092	3456.51	6169.7	34200.1	2053.48	3200.45	0	0	0	0	0	0	0	0	0	0	0	0	0	0	0	0	0	0	0	0
	2017-04-04 13:20:00	83.5049	343.013	6593.88	33984.7	480.963	1136.45	7117.98	31498.4	8437.85	33396.1	337.419	329.131	316.572	291.037	507.03	585.697	1733.15	2439	421.704	532.898	740.778	975.674	1946.21	3500.16	6402.66	33151.3	1979.71	3491.84	0	0	0	0	0	0	0	0	0	0	0	0	0	0	0	0	0	0	0	0
	2017-04-04 13:25:00	2638.18	5156.02	837.143	2494.49	4529.04	22093.1	5641.4	19176.4	5072.4	20287.7	166.662	148.3	151.511	131.049	370.572	290.948	1551.89	2372.86	2834.83	7319.75	410.217	314.423	1782.77	3459.14	10130.7	49998.2	1749.97	3299.56	9490.52	38011.2	0	0	0	0	0	0	0	0	0	0	0	0	0	0	0	0	0	0
	2017-04-04 13:30:00	8555.46	15470.9	309.245	273.61	7470.54	36688	4194.9	8984.87	2903.52	8238.38	153.057	136.679	145.918	130.624	427.088	334.905	2132.89	3396.62	4019.53	9681.76	281.566	226.016	1793.61	3448.94	3089.72	13006.3	2446.78	4774.24	6510.66	25076.9	0	0	0	0	0	0	0	0	0	0	0	0	0	0	0	0	0	0
	2017-04-04 13:35:00	84.5989	948.033	454.698	254.231	4295.74	20131.3	2682.97	4737.85	2739.17	6253.47	306.195	141.899	298.699	133.193	518.477	290.807	3246.08	4950.32	2517.68	5502.59	441.887	231.595	1979.75	3519.95	554.376	451.073	3703.28	7050.66	6959.35	23944.5	0	0	0	0	0	0	0	0	0	0	0	0	0	0	0	0	0	0
	2017-04-04 13:40:00	85.4372	264.612	287.455	249.999	3596.6	17947.1	2212.12	4567.6	2537.79	6143.94	135.596	134.872	140.351	141.63	347.151	287.535	3072.46	4905.29	2186.91	5087.73	274.199	229.68	1777.22	3469.48	354.346	290.46	3550.92	7086.75	11582.4	42875.2	3380.72	17941.7	0	0	0	0	0	0	0	0	0	0	0	0	0	0	0	0
	2017-04-04 13:45:00	84.4195	230.388	338.291	245.824	3562.15	17829.9	2261.63	4509.15	2596.55	6118.07	190.899	135.611	181.855	127.612	401.868	288.168	3162.84	4939.67	2253.16	5091.41	329.84	230.844	1866.04	3568.72	409.704	293.341	3636.24	7150.59	9320.92	32200.3	3286.7	18158.7	0	0	0	0	0	0	0	0	0	0	0	0	0	0	0	0
	2017-04-04 13:50:00	84.491	297.02	414.216	247.883	3680.87	18061.2	2351.17	4514	2705.08	6270.6	264.033	137.547	254.951	129.601	473.663	288.177	3218.89	4964.08	2339.43	5168.85	401.652	231.404	1949.06	3597.33	484.085	295.094	3700.04	7134.59	8865.68	29164.4	3406.19	18032.4	0	0	0	0	0	0	0	0	0	0	0	0	0	0	0	0
	2017-04-04 13:55:00	3532.21	7246.91	422.202	248.729	5210.53	24999.1	2904.73	5392.3	2715.89	6266.52	265.52	134.728	264.259	131.789	513.548	319.244	3189.32	4862.11	3119.45	7031.28	401.665	228.945	1939.69	3507.53	496.382	293.546	3672.23	7059.53	9156.19	30554.7	3461.37	17833.5	0	0	0	0	0	0	0	0	0	0	0	0	0	0	0	0
	2017-04-04 14:00:00	8440.68	12398.4	630.485	245.607	6497.17	30809.6	3534.82	6051.1	2889.66	6139.41	502.122	214.595	474.782	133.624	743.15	324.492	3430.6	4915.06	3999.91	8708.18	618.75	230.299	2111.76	3426.56	739.152	318.296	3926.57	7121.06	9215.82	31344.8	3763.87	18900	420.064	341.617	0	0	0	0	0	0	0	0	0	0	0	0	0	0
	2017-04-04 14:05:00	8495.06	18747.5	2021.47	4791.27	6055	24074.5	3251.69	4942.47	3526.39	8376.02	1456.15	2885.47	1499.47	1594.92	1358.56	257.626	2982.26	3867.64	3319.79	5759.08	1255.43	188.749	2339.57	3157.28	1394.96	259.73	2987.31	3952.83	5900.94	16824.7	3200.85	10293.8	1183.03	157.705	0	0	0	0	0	0	0	0	0	0	0	0	0	0
	2017-04-04 14:10:00	13366.3	59706.7	8131.82	38141	5059.36	26105	1966.22	10593	17750.1	67779.1	6987.75	33938.3	3527.68	6384.52	5757.85	28590.9	2846.85	4892.67	2545.66	4087.53	1051.95	323.411	935.399	168.956	934.972	141.642	940.52	178.785	984.399	360.408	957.473	301.84	925.723	141.148	0	0	0	0	0	0	0	0	0	0	0	0	0	0
	2017-04-04 14:15:00	17564.5	36122.3	7749.74	35739.3	4311.91	25397	4275.52	26064.2	15557.5	71608.7	7734.7	39686.1	3987.93	7415.34	8465.34	39991.7	3847.54	5171.85	3701.78	6787.33	6635.48	24781.1	2296.13	2945.31	6286.23	30719.1	3052.6	4217.15	11602.4	49336.6	3275.68	14633.9	1232.67	379.86	0	0	0	0	0	0	0	0	0	0	0	0	0	0
	2017-04-04 14:20:00	18886	29877.7	845.927	604.337	4253.43	29134.5	4228.24	29856.6	8118.75	34863.3	6587.62	34489.5	3159.61	9580.2	895.525	790.316	2717.14	3638.59	3444.2	7591.91	820.099	618.55	2402.67	3807.03	8444.63	42885.1	2989.51	4942.91	18743.9	75532.9	5331.62	31587.4	594.328	849.936	0	0	0	0	0	0	0	0	0	0	0	0	0	0
	2017-04-04 14:25:00	661.935	1534.75	637.193	250.611	2946.84	17629	3552.05	19178.3	6157.49	23732	4016.32	18450.8	1930.1	10574.5	612.818	225.315	2209.86	3403.85	2378.04	5162.64	562.879	183.241	1931.28	3202.27	5152.69	24026.3	2334.95	3920.61	11053.4	37498.2	3279.41	18341.6	689.254	985.636	0	0	0	0	0	0	0	0	0	0	0	0	0	0
	2017-04-04 14:30:00	26872.5	47463.1	4260.99	16369.4	4090.03	15061.5	1662.62	378.674	2396.23	2766.65	2809.04	8829.63	2181.6	2080.08	2628.66	8829.24	1872.7	1463.26	2568.37	2890.56	1543.45	132.673	1561.39	169.383	1607.48	368.332	1571.28	185.81	1693.81	632.297	1586.78	375.959	1543.36	148.343	1562.34	155.369	0	0	0	0	0	0	0	0	0	0	0	0
	2017-04-04 14:35:00	26823.7	46899.7	4157.01	21215	2554.06	14946.5	435.664	220.113	1310.79	2460.92	2487.12	13709.6	1151.18	1941.55	2699.76	14751.7	1220.16	1953.25	1560.02	2724.45	389.617	782.077	334.51	127.921	335.776	126.226	335.565	128.34	338.025	136.106	341.753	133.22	340.738	131.323	344.115	135.874	0	0	0	0	0	0	0	0	0	0	0	0
	2017-04-04 14:40:00	10064.5	26562.5	6610.13	27864.3	3084.63	11910.6	11904.8	46111.6	3054.42	3648.07	6315.68	26782.2	3495.71	5758.11	6562.53	28459.4	2926.22	3024.67	2337.32	2178.96	7578.14	26635.5	2629.56	2994.92	4709.37	20553.6	2456.03	2738.96	2153.08	5233.36	2025.32	5146.46	3735.97	12437.8	1640.66	1957.65	0	0	0	0	0	0	0	0	0	0	0	0
	2017-04-04 14:45:00	5094.19	24457.2	4960.44	25969.7	1509.39	8608.31	8841.73	39099.7	2034.69	3403.58	2777.25	14765.6	1394.71	3579.85	5252.61	27229.2	1780.6	2283.4	1126.73	2000.94	739.527	932.656	2051.85	3484.18	3400.11	16254.3	2046.68	3513.99	3847.35	21022.1	3423.34	20706.8	6599.41	32465	2452.69	15095	0	0	0	0	0	0	0	0	0	0	0	0
	2017-04-04 14:50:00	85.4713	313.075	2954.16	15574.4	321.88	197.771	5856.59	25904.6	1763.85	3077.75	327.912	233.973	315.276	155.984	3108.54	15189	1541.89	1954.98	319.065	150.86	482.797	262.673	1803.31	3170.62	471.481	387.368	1800.93	3163.94	4164.78	18431.1	3486.36	17859.3	768.719	2083.05	341.365	339.126	0	0	0	0	0	0	0	0	0	0	0	0
	2017-04-04 14:55:00	83.9265	183.01	2933.52	15442.7	308.968	134.558	6348.54	27445	1840.86	3230.92	311.703	136.11	305.376	130.145	3224.56	15278.7	1587.73	2016.27	313.773	138.092	498.581	271.192	1869.46	3315.71	446.108	226.338	1873	3298.35	4085.68	18020.9	3570.33	17782.7	673.848	1627.08	308.836	131.812	0	0	0	0	0	0	0	0	0	0	0	0
	2017-04-04 15:00:00	271.178	1609.85	3102.17	14913	551.528	137.076	6483.22	26632.6	2051.99	3191.73	14132.4	624.774	545.863	132.665	3418.74	15462.7	1793.66	1943.86	551.21	139.898	734.403	266.433	2092.67	3280.54	706.794	235.641	2080.16	3233.68	4385.21	18104.3	3738.75	18454.4	932.053	1674.18	554.43	141.141	352.724	576.797	0	0	0	0	0	0	0	0	0	0
	2017-04-04 15:05:00	7600.82	24940.5	4154.21	11154.1	2908.67	9034.32	3353.96	6109.98	2553.14	3118.6	3028.99	6822.23	2002.22	1764.79	2830.16	8520.07	2199.46	2272.1	2006.43	1549.92	1625.49	180.577	2246.99	1864.49	1649.93	185.494	2119.65	1386.01	1968.65	2034.4	1976.74	2087.33	2056.25	2183.07	2746.14	4716.44	1659.65	172.816	0	0	0	0	0	0	0	0	0	0
	2017-04-04 15:10:00	41919.8	82245.4	7798.87	34604.4	5751.01	34996.9	14880.1	61097.1	3934.86	6064.9	8758.41	43897.7	4017.48	6211.25	8631.15	43985	3655.45	4764.2	4286.51	8660.17	3520.55	9747.92	3156.3	4327.44	1111.13	336.223	2851.43	3937.15	12110.3	40789.4	2876.42	14003.6	1105.29	300.945	4381.37	22070.3	1051.52	287.09	0	0	0	0	0	0	0	0	0	0
	2017-04-04 15:15:00	395.977	1354.83	5444.65	23770.2	4951.55	32241	14203.1	57367.3	3326.41	5324.57	7900.6	40591.3	3335.71	6859.28	7913.93	41031.9	3174.45	4539.63	3812.27	8284.22	2564.2	6872.04	2830.87	4203.46	842.339	280.772	2605.42	3909.82	12561.8	43951.6	2932.46	16789.9	840.177	240.444	4366.26	23969.9	802.005	247.312	0	0	0	0	0	0	0	0	0	0
	2017-04-04 15:20:00	6264.81	27605	381.761	244.618	5796.32	33227.8	12932.8	54580.9	2093.47	3887.45	6032.71	31225.7	2053.09	3921.42	7489.73	37080.3	2247.79	4368.29	4056.68	10368.2	410.959	260.401	2134.46	3987.23	230.17	127.937	2110.1	3926.84	14335.7	64986.4	3182.01	23308.8	233.666	139.329	4332.09	25233.1	230.976	129.832	3850.06	24323.9	0	0	0	0	0	0	0	0
	2017-04-04 15:25:00	1393.48	3579.38	357.116	220.617	4142.15	20496.4	7576.56	27233.3	2444.25	4563.67	485.132	678.713	267.88	180.125	493.184	737.502	2586.41	5018.47	2580.71	5714.32	340.5	195.417	2438.84	4611.64	245.878	124.483	2441.13	4607.27	10834.9	36352.8	3306.72	18831.9	244.513	127.684	340.664	644.303	245.444	128.995	5337.42	26850.3	0	0	0	0	0	0	0	0
	2017-04-04 15:30:00	513.285	1820.45	470.556	203.952	1465.15	4668.04	5123.18	18670.3	2572.95	5272.24	505.06	198.206	928.564	1885.28	492.266	190.73	2610.4	5609.95	796.802	1137.44	431.619	183.682	2615.85	5182.48	358.254	139.875	2371.12	4589.8	3955.49	13383	1977.14	8619.75	366.038	176.996	423.348	327.947	358.25	132.598	4706.49	21343.7	0	0	0	0	0	0	0	0
	2017-04-04 15:35:00	20140.9	42617.7	5748.32	22341.4	4525.11	16058.5	6810.58	22304.4	3473.35	4200.59	4933.81	17311.2	3323.81	3513.84	4104.35	15210.9	3038.44	2927.92	2970.89	2787.66	17525.1	9271.16	2481.49	1574.37	2537.98	3676.22	2186.35	746.972	2143.87	372.099	2168.04	253.684	2134.26	136.548	2533.79	1631.36	2139.63	149.169	2653.52	2025.24	2174.2	172.601	0	0	0	0	0	0
	2017-04-04 15:40:00	7201.43	28223.5	7981.5	39253.5	4762.42	26051.9	15191.1	62477.1	3374.15	4643.88	7149.23	38984.1	3795.57	6399.07	7341.65	39293.9	3353.83	4534.31	3847.17	7740.29	1671.54	470.334	3355.95	4585.28	4367.85	24414.8	3362.87	4624.74	18194	66768.5	1976.39	7368.14	1073.47	431.244	4677.36	25643.6	1065.33	381.903	3486.95	18945.9	1058.34	353.054	0	0	0	0	0	0
	2017-04-04 15:45:00	1312.03	3807.49	2726.51	19220.3	3900.53	22387.6	19791	73534.9	1898.06	3427.61	3995.83	25656.9	2197.69	6912.13	3038.35	19441.6	1939.81	3259.92	1133.4	2551.16	482.329	259.258	1968.4	3499.35	2589.04	17999.6	2005.65	3853.07	3712.7	15061	2687.18	16487.5	313.898	137.09	3553.66	23079	316.671	139.232	2955.78	17945	316.254	141.055	0	0	0	0	0	0
	2017-04-04 15:50:00	84.6885	700.329	290.66	1172.08	336.513	1149.11	1672.73	6342.85	257.129	310.869	386.378	1468.87	261.257	431.762	284.974	1091.89	256.317	299.952	178.894	181.86	167.48	134.899	264.994	322.373	307.11	1237.9	247.981	298.008	278.545	701.669	310.398	1104.4	158.979	128.042	350.122	1313.91	159.136	127.014	308.993	1186.93	160.11	127.62	224.03	283.983	0	0	0	0
	2017-04-04 15:55:00	86.2746	226.757	199.289	170.344	161.613	132.706	509.273	1682.18	168.348	136.157	175.556	158.829	191.221	153.535	177.788	155.525	157.586	121.607	172.796	138.32	163.797	126.976	164.484	128.148	157.867	129.872	166.966	129.907	201.861	386.18	166.799	135.777	169.265	134.055	173.763	153.578	174.409	138.889	171.137	142.386	167.917	128.588	174.23	168.075	0	0	0	0
	2017-04-04 16:00:00	85.1881	275.057	288.27	161.52	280.621	137.032	611.133	1795.32	278.487	134.205	287.747	166.739	279.458	156.286	278.734	138.746	276.651	129.289	277.342	133.492	273.02	126.722	274.972	127.819	273.748	126.483	280.033	134.715	327.239	602.897	285.24	243.376	272.597	127.48	283.583	159.049	280.751	136.805	276.986	129.776	278.152	132.144	277.896	138.462	176.85	267.78	0	0
	2017-04-04 16:05:00	85.2439	250.134	145.578	161.224	133.478	132.474	450.791	1677.91	145.047	146.312	148.076	175.932	145.043	203.682	133.157	133.246	130.055	125.132	134.795	131.778	132.293	126.364	131.645	126.788	131.482	124.322	136.123	133.021	187.508	541.553	133.045	126.208	137.846	133.8	147.291	168.044	132.999	128.517	135.06	127.057	135.77	126.912	135.445	129.445	97.1377	26.6437	0	0
	2017-04-04 16:10:00	85.3526	232.206	161.748	161.146	148.4	135.38	450.041	1568.82	148.064	135.871	168.593	188.9	160.34	220.197	149.554	136.348	144.488	124.473	148.796	134.972	153.211	138.88	145.482	129.337	145.33	125.846	145.056	128.613	168.823	413.317	145.941	126.952	151.935	136.284	161.747	173.014	146.572	129.993	148.181	131.887	149.183	130.475	149.72	134.167	108.691	19.7181	0	0
	2017-04-04 16:15:00	83.6689	311.146	143.4	189.321	120.723	133.632	408.43	1522.54	120.263	130.423	158.995	261.017	160.384	377.466	120.571	133.803	121.174	131.443	121.911	133.841	116.358	123.427	117.728	126.77	117.364	122.834	116.472	124.922	126.117	310.355	118.846	126.299	109.644	117.554	155.514	255.677	118.759	127.326	125.912	134.232	119.189	126.033	121.179	130.926	80.8784	20.8893	0	0
	2017-04-04 16:20:00	85.1167	366.672	1529.48	5932.56	1415.57	6354.82	4922.12	19575.5	525.756	589.408	1154.54	5516.71	736.626	3220.52	1174.79	5090.87	401.912	323.448	578.8	920.626	343.542	193.506	656.364	1722.87	2823.29	11222.4	717.746	1722.7	1232.44	4842.29	1068.18	5360.36	259.83	144.395	1440.06	6017.36	255.966	138.143	709.804	2371.2	256.537	135.81	297.307	332.034	270.202	175.852	197.934	411.518
	2017-04-04 16:25:00	10728.1	38704.4	7951.55	31762.9	7029.33	26484.2	8555.25	26912.4	14245.4	54872.6	6768.64	25719.6	4263.84	5654.15	5776.48	23977.2	3988.42	5324.17	2942.34	2391.3	3885.4	9232.95	2777.5	1938.54	2463.23	3387.66	2553.81	1431.73	2064.5	467.416	2152.59	227.047	2127.02	138.732	2159.54	251.419	2120.3	138.326	2129.71	174.888	2126.08	135.787	2143.59	142.548	2125.43	142.04	2154.28	158.794
	2017-04-04 16:30:00	0	0	5626.22	23645.9	9430.34	45437.6	15943.1	57224.8	20682.8	84455.7	6343.66	30334.7	3711.26	5096	7879.86	40094.5	5106.15	8549.75	2736.23	3048.33	1422.07	303.531	4192.54	6059	1368.52	290.418	4788.2	7010.78	5400.02	28043.5	4146.72	23846.9	1255.5	395.614	1259.28	379.151	1254.61	343.465	5261.84	24734.3	1250.67	366.097	2596.45	3359.29	2062.63	7038.09	1235.82	395.62
	2017-04-04 16:35:00	0	0	469.045	496.954	5470.77	26954.5	5701.02	20316	12329.8	40661.2	2697.07	17431.3	1436.44	2628.9	4013.87	23583.3	2600.99	5687.85	1484.25	2733.73	263.013	131.316	2121.53	3935.32	267.098	129.52	2266.79	4136.7	6866.5	32227.7	3552.1	22541.6	264.65	135.552	265.308	136.19	269.455	137.771	3840.34	23811.5	273.949	142.989	2264.92	4377.53	3346.77	22028	274.632	144.006
	2017-04-04 16:40:00	84.1937	241.552	163.802	196.836	293.066	602.472	1216.72	4440.68	10980.6	32969.3	126.101	423.164	107.617	184.607	3195.85	17728	2036.72	4757.56	99.1812	167.048	80.6967	129.136	1667.06	3386.15	86.9996	133.658	1771.59	3547.83	7412.17	32955.1	3516.69	20309.4	80.3076	127.097	81.9996	128.536	92.6717	140.916	3214.28	17754	86.072	130.212	1796.31	3707.99	3454.81	20552.5	89.6889	137.882
	2017-04-04 16:45:00	84.64	209.673	164.092	198.571	224.374	247.277	1486.67	5459.69	11669.5	37077.8	81.0766	135.77	74.3446	132.829	3581.48	19956.2	2181.67	5116.41	77.9971	130.077	73.5607	124.718	1663.55	3298.23	78.4367	129.09	1877.95	3771.03	7293.21	32393.5	3740.96	21609.1	75.5229	127.435	75.9396	126.439	66.6201	117.257	3533.47	18891.7	72.6058	121.725	1912.6	3928.3	3457.4	20768.3	75.8537	131.472
	2017-04-04 16:50:00	85.4499	278.179	159.581	194.24	225.793	246.714	999.022	3767.84	11798.9	37098.1	81.5497	137.597	75.4323	130.265	3396.13	19032.7	2106.99	4974.5	83.8509	141.821	73.7286	126.417	1626.69	3206.42	73.7847	126.368	1794.76	3607.41	6931.23	31746.2	3557.69	19941.4	72.8695	124.587	74.6951	127.048	74.8603	125.783	3367.47	17959.9	74.591	124.776	1839.26	3775.01	3446.33	19612.6	80.1524	133.285
	2017-04-04 16:55:00	1121.49	4502.96	168.061	202.246	252.17	258.847	818.667	3125.53	11817.2	37344.4	727.498	4778.63	387.746	788.028	3344.98	18301.8	2062.32	4877.14	368.324	567.772	69.5449	123.97	1617.32	3181.35	70.5736	126.376	1767.29	3559.23	6958.28	32508.2	3661.45	20827	74.5378	133.793	69.5317	126.175	75.2674	133.149	3354.44	17773.7	69.8247	125.108	1761.74	3628.63	3464.25	20272.9	79.8719	135.775
	2017-04-04 17:00:00	2637.57	12521.7	197.622	222.638	264.34	272.183	813.8	3023.7	11365.8	34178.5	1956.97	13235.1	1004.73	2102.05	3331.67	18589.7	2025.98	4792.48	911.301	1392.78	71.1656	124.634	1640.47	3189.09	71.3801	123.484	1748.66	3520.08	6821.31	31165.5	3653.91	22009.7	70.6759	125.441	73.6103	127.685	78.8861	135.936	3329.48	17868.9	73.6695	124.453	1764.87	3615.23	3339.15	21343.6	62.7435	117.505
	2017-04-04 17:05:00	125.089	321.431	89.5904	143.089	157.801	190.331	611.632	2368.1	9071.09	4207.28	100.317	268.646	82.3407	148.227	286.537	1323.8	220.689	482.912	85.4174	143.443	72.055	123.019	1591.74	10243.8	73.3404	123.996	196.021	369.309	5971.52	25759.1	3356.26	18132.3	77.0049	131.682	73.7851	125.816	74.1023	127.494	311.111	1421.36	73.6345	125.143	194.285	376.822	3145.32	17675.6	74.5376	128.699
	2017-04-04 17:10:00	86.5463	292.88	98.8895	154.079	148.741	185.141	603.71	2353.77	9464.81	1653.97	78.8562	135.124	72.8974	130.2	73.8312	141.272	74.519	130.348	77.1124	132.482	82.0188	137.395	1609.4	11331.5	72.6279	123.892	74.2327	130.26	5892.85	26519	3342.63	17613.7	74.1109	126.919	74.2783	128.202	74.2094	128.071	77.043	146.555	72.563	124.359	75.4314	130.681	3025.12	17485	77.8181	131.707
	2017-04-04 17:15:00	85.4209	290.355	71.4556	122.557	153.586	186.418	592.898	2263.5	9533.79	1622.79	82.4577	135.399	76.2599	128.559	78.4596	135.342	81.0368	131.664	78.8288	129.429	75.7686	124.594	1609.01	11309.9	75.7819	125.203	75.6872	124.776	5771.98	25695.6	3368.75	18528.7	75.2606	125.281	77.7243	127.501	77.1843	127.137	80.9775	133.801	77.8745	126.799	75.8975	124.604	3013.68	17265.7	77.2995	128.747
	2017-04-04 17:20:00	86.2465	304.428	85.9771	138.219	153.239	185.485	587.1	2219.53	9485.39	1633.96	83.5478	136.531	75.837	131.224	80.4193	137.23	79.5181	131.909	79.5963	130.029	94.3858	133.559	1626.43	11458.1	75.5642	124.305	75.9579	125.399	5927.73	26221.4	3342.31	17885.2	78.7505	131.192	76.2794	127.393	76.8623	126.825	77.8449	131.474	75.7978	125.942	75.6266	126.198	3042.04	17229.8	87.2988	141.559
	2017-04-04 17:25:00	85.3764	292.113	95.0458	150.404	152.227	184.328	595.371	2264.36	9520.32	1614.21	91.465	147.872	75.949	129.769	78.5802	135.539	74.3595	124.984	80.6659	132.574	76.468	126.329	1619.86	11366.7	75.4795	124.217	76.3633	127.628	5870.24	26157.5	3353.12	18395.1	76.1679	126.085	85.8736	138.31	78.239	126.925	81.0708	133.059	77.7886	127.612	78.6221	127.135	3055.95	16844.9	80.5954	129.998
	2017-04-04 17:30:00	1375.03	6058.4	1214.22	2823	1131.19	2012.47	1451.38	2370.58	6137.24	2989.06	1260.83	1740.96	1186.97	4124.34	1400.54	3373.02	1272.61	1667.46	894.942	639.71	876.275	130.672	1384.49	3131.5	892.498	194.147	1168.38	1332.76	3662.42	12222.7	2575.21	8949.08	876.61	140.29	882.395	142.986	909.982	147.855	1594.48	3783.65	880.066	146.288	1155.68	973.566	2493.74	8618.61	877.76	143.468
	2017-04-04 17:35:00	18265.4	51727.4	10404.7	47937.3	7958.58	33109.8	6044.05	13821.9	19959.2	87484.4	9780.15	43874.8	5163.97	7544.5	8637.03	40531.8	3648.22	4268.65	3680.05	4054.96	8505.94	29380.5	2124.8	959.493	5007.57	20059.6	2843.23	2395.48	8088.98	29091.8	2800.22	7544.63	2458.61	1929.54	4729.91	20155.5	2094.26	1143.24	2153.02	487.826	5948.47	7417.77	1895.01	146.324	1966.33	278.753	1950.6	139.642
	2017-04-04 17:40:00	929.395	30033.1	5748.49	27657.9	1216.07	658.501	954.033	326.924	17069.9	66853	5543.29	26680.3	2750.9	3968.82	5672.24	21685.1	2511.68	4023.2	3110.18	3778.83	1079.36	600.449	906.286	155.039	947.679	411.02	2498.68	3480.55	6225.85	27537.9	3168.63	16699.7	928.611	256.356	4629.18	23985.5	907.319	156.344	9238.38	29218.6	8154.6	14715.7	2138.29	2963.37	819.205	349.183	1743.94	2161.04
	2017-04-04 17:45:00	3281.2	5520.32	2901.36	17549.3	241.957	244.711	88.0281	135.195	13102	47316.1	2181.62	13085.9	782.643	4000.12	370.586	575.675	1465.51	3372.27	1716.37	2784.65	136.666	169.853	86.6843	122.591	93.9553	129.934	1688.99	3484.22	1183.76	5260.03	562.687	3291.83	905.685	129.185	1601.33	10613.4	94.5425	128.982	8289.17	16875.4	9341.95	17267.6	1503.79	2706.78	91.9381	132.058	836.15	1482.19
	2017-04-04 17:50:00	84.7173	403.551	2969.85	17474.3	227.735	243.362	76.6911	133.571	14777.1	52598.9	2403.39	14435.5	892.824	5727.18	291.049	285.952	1629.05	3795.48	1546.18	2532.17	131.098	172.698	75.0136	124.966	74.2201	124.827	1742.89	3646.99	663.29	2695.42	82.5181	172.976	756.497	125.74	1809.01	12155.5	77.8722	125.896	8493.22	18049.2	7456.39	10230.9	1684.77	3048.86	78.7591	127.749	916.686	1650.54
	2017-04-04 17:55:00	84.7554	419.084	2974.19	17871.7	217.819	236.938	71.8909	132.073	14707.6	52682	2276.72	13744.6	927.467	6097.82	296.018	298.31	1679.51	3940.69	1530.97	2524.17	127.798	170.964	72.4136	126.676	72.8275	125.342	1744.72	3600.11	698.39	2829.51	72.802	125.635	720.21	125.722	1854.33	12032.5	77.1028	132.239	8361.46	18756.9	721.15	1241.27	1707.6	3113.27	73.1452	126.441	962.538	1748.57
	2017-04-04 18:00:00	4702.18	13189.8	242.114	1119.65	213.319	231.29	73.6362	131.244	1465.76	5387.36	259.543	1240.26	156.827	978.496	261.591	266.637	183.839	387.939	2032.08	3323.08	87.4338	137.782	73.4002	125.666	73.6471	123.643	175.089	331.272	2309.73	11985.4	1616.92	9154.28	758.873	133.298	207.045	1082.29	77.6677	132.449	16759.5	27578.1	73.7652	125.659	184.669	331.292	78.4987	130.868	150.976	269.834
	2017-04-04 18:05:00	2667.36	7979.75	121.16	249.352	179.241	201.722	75.4129	128.273	413.088	1565.06	83.9658	148.995	76.814	140.746	249.77	257.896	77.8316	129.685	1804.78	2960.48	88.9145	135.968	75.355	125.152	74.925	123.168	81.9318	135.674	1584.83	8058.66	929.793	5021.95	805.186	132.752	77.4184	140.938	74.929	124.713	452.876	1667.01	76.2804	123.65	77.6929	128.659	76.042	125.74	78.4375	128.748
	2017-04-04 18:10:00	83.5588	276.469	137.741	276.814	152.554	187.356	73.94	127.35	372.38	1479.66	79.272	135.74	72.9422	130.161	215.221	232.459	71.7314	123.95	1518.95	2473.81	99.9513	150.671	73.6962	126.357	72.4471	122.624	71.9846	124.46	710.537	2783.8	86.9648	205.802	735.333	125.971	73.0961	126.336	73.2475	125.432	434.124	1591.44	72.3082	123.249	73.5688	124.947	77.0093	127.69	74.4919	126.297
	2017-04-04 18:15:00	85.6058	248.819	114.222	257.25	151.886	184.316	74.9397	125.782	373.11	1451.56	84.0419	138.875	76.6192	129.88	224.737	238.757	80.349	134.084	1533.5	2496.53	92.8637	138.149	75.9723	126.203	77.282	126.975	74.9484	125.659	698.351	2712.32	75.1592	124.686	748.157	125.073	76.2832	127.2	75.6018	125.971	336.336	1130.34	77.1993	126.108	76.3028	124.212	76.4597	123.512	77.6764	129.956
	2017-04-04 18:20:00	86.8211	254.231	138.549	288.073	155.379	185.022	79.3246	126.655	370.001	1408.4	85.6045	135.864	79.7158	129.877	227.652	238.031	83.8131	133.088	1542.15	2528.77	98.6778	140.18	78.5457	124.838	78.5	122.646	80.1042	126.505	611.81	2299.73	78.7624	124.124	786.593	126.194	79.6627	127.527	80.1386	125.423	328.393	1094	78.6502	123.751	78.5344	125.173	85.2463	132.4	88.8352	140.582
	2017-04-04 18:25:00	84.6508	260.753	147.626	317.659	152.696	185.808	78.038	129.263	368.898	1421.29	90.0947	149.934	74.0509	129.144	222.572	236.426	74.0587	127.474	1540.34	2519.33	97.2179	142.56	79.014	130.97	73.3892	123.61	74.3915	126.569	595.458	2252.25	74.3367	123.269	753.217	127.71	85.2527	139.415	74.8113	126.974	328.267	1103.44	76.2019	125.637	77.3952	127.072	76.7058	125.718	77.9853	129.029
	2017-04-04 18:30:00	84.6365	247.653	143.639	322.022	150.72	183.393	69.572	121.591	370.625	1442.58	82.088	138.502	74.6224	130.809	222.863	236.542	73.5175	124.001	1533.59	2501.49	97.7412	142.471	78.5878	132.179	74.1427	123.622	73.1293	124.255	580.559	2201.24	74.214	124.671	73.142	124.954	72.4855	128.125	74.5579	127.714	326.084	1101.01	78.0808	130.678	72.614	126.746	75.6876	125.403	75.7599	127.403
	2017-04-04 18:35:00	85.4491	218.218	146.906	333.434	150.66	182.86	83.0299	137.703	388.165	1441.5	80.0398	136.91	75.2318	129.91	224.292	238.332	74.2129	126.435	1531.62	2492.39	100.359	141.702	74.4208	125.72	75.1527	122.815	74.396	126.572	597.331	2230.78	78.9954	128.893	74.4405	125.314	74.4358	125.373	75.4497	125.957	331.383	1093.58	79.0967	130.842	75.1293	124.616	76.1122	125.363	75.4661	125.288
	2017-04-04 18:40:00	84.8895	251.342	158.029	349.589	159.915	191.764	78.9394	126.429	374.325	1439.85	85.0592	136.771	87.6447	142.008	225.538	235.842	78.8499	126.123	1543.48	2525.13	107.176	145.54	78.1918	124.864	81.5503	130.052	78.8237	125.893	581.06	2202.25	82.6811	129.733	79.0756	127.15	78.613	127.5	77.9479	125.356	329.68	1099.46	78.1071	124.412	79.2738	125.426	80.7188	126.971	77.6454	124.767
	2017-04-04 18:45:00	84.885	257.656	157.559	365.556	151.176	184.585	74.8113	125.436	368.72	1450.73	81.9417	136.759	74.6178	129.423	225.312	238.041	75.3459	125.183	1547.17	2531.93	104.835	146.696	73.8751	123.543	80.1373	130.203	74.7152	125.903	584.468	2212.53	72.8962	122.672	73.1906	123.513	74.5286	126.345	76.1877	127.877	321.44	1083.71	74.1763	123.504	79.7104	131.202	75.9524	124.247	76.0895	125.795
	2017-04-04 18:50:00	85.2555	219.914	162.578	374.545	156.077	191.02	73.6018	124.311	369.75	1447.03	80.8939	135.784	73.8613	128.012	224.333	237.575	73.1584	123.57	1542.38	2511.94	105.84	146.553	76.534	127.232	74.0973	124.69	73.0034	122.891	592.403	2252.26	74.6051	125.241	74.6536	124.619	74.1864	126.217	73.029	122.735	324.249	1093.78	74.7131	124.618	78.8054	132.106	74.8577	125.441	74.214	125.295
	2017-04-04 18:55:00	83.819	249.061	161.991	391.933	147.233	182.362	72.4911	126.056	370.58	1445.6	79.0651	136.753	72.804	131.508	229.125	249.628	72.0444	126.807	1531.42	2497.95	105.569	148.39	69.7773	122.816	71.0668	123.821	73.0196	127.014	584.442	2221.82	71.7588	122.159	70.9264	124.731	72.7862	125.665	78.7621	131.985	322.871	1088.42	70.3016	120.028	72.4868	124.122	74.0496	126.546	72.1092	125.583
	2017-04-04 19:00:00	85.5546	254.27	168.379	403.837	152.366	186.849	73.7934	124.674	369.891	1446.14	79.4342	135.382	73.7562	130.211	221.383	235.823	74.0265	126.055	1536.34	2505.41	109.969	152.611	72.9735	125.242	79.3128	130.61	78.6794	132.525	585.767	2213.7	72.8316	122.676	77.4575	132.077	74.1282	125.986	75.3176	128.25	315.66	1077.86	74.7198	125.929	73.5862	124.963	80.1431	132.368	74.1054	124.902
	2017-04-04 19:05:00	84.0415	257.16	174.673	415.043	151.819	183.9	75.0244	124.191	372.471	1427.49	87.6756	142.817	75.6848	129.173	247.136	249.294	75.568	124.878	1549.1	2546.18	113.602	151.895	75.5589	124.966	69.4463	118.607	80.1356	132.049	580.383	2180.86	75.4416	125.874	79.9181	131.783	75.5065	126.272	82.8968	134.463	318.895	1058.07	75.5086	123.421	75.7995	125.786	75.8839	126.009	75.6978	126.475
	2017-04-04 19:10:00	85.2661	278.067	177.74	436.513	148.787	184.347	73.39	125.269	383.233	1441.73	75.0975	132.271	73.5286	131.48	219.177	234.91	71.5672	124.028	1533.52	2515.29	122.456	166.492	74.1795	128.481	72.1817	123.088	70.997	124.88	585.378	2221.42	72.1648	122.99	72.093	124.528	74.1833	127.652	64.6127	115.813	319.261	1071.86	71.5866	123.626	93.5957	134.906	72.6535	125.376	73.2151	126.675
	2017-04-04 19:15:00	84.3294	303.519	181.121	444.795	152.214	186.072	73.7066	125.504	363.629	1417.6	79.9764	134.922	74.6122	128.283	222.513	235.734	80.011	133.907	1543.28	2527.67	116.346	155.374	73.3734	125.354	73.2363	123.216	74.0076	125.724	582.266	2200.65	74.3137	124.358	74.6141	125.778	73.8541	126.355	73.3823	123.723	340.805	1197.69	74.2045	124.928	74.3414	124.597	75.3566	124.626	74.6187	124.382
	2017-04-04 19:20:00	274.201	1680.22	200.828	474.832	158.332	188.838	74.5647	124.068	367.99	1441.68	80.7327	134.528	75.0754	129.101	228.058	240.456	78.384	130.192	1592.94	2597.19	118.352	157.042	74.3083	125.41	74.6872	123.184	74.7966	124.717	771.772	3363.53	234.453	1079.01	74.8046	124.823	74.5045	126.08	76.0633	126.39	348.168	1242.18	75.5841	124.471	73.5806	124.092	79.1564	130.749	83.7064	139.087
	2017-04-04 19:25:00	16191.1	19232.7	198.106	490.218	234.006	245.013	73.7219	124.185	362.997	1441.19	91.267	150.495	73.6478	128.635	275.845	276.322	71.9845	125.395	2302.88	3777.32	118.787	157.55	78.9499	131.52	74.562	124.92	72.4913	122.927	3209.47	17978.5	2383.44	13285	72.6886	124.034	83.7424	139.582	72.7174	124.676	311.359	958.946	72.5124	122.805	74.7927	126.257	74.1067	126.356	72.7073	124.383
	2017-04-04 19:30:00	83.9865	367.657	199.416	496.072	151.219	185.505	72.5451	124.121	366.261	1431.69	79.882	136.845	73.8445	128.557	221.969	236.008	74.2498	126.165	1525.91	2499.69	122.624	159.228	77.9539	133.598	72.4433	122.089	73.4598	125.173	718.704	2912.45	105.245	304.206	72.9692	126.773	73.2502	127.673	72.6161	124.359	308.085	950.521	76.944	129.398	72.6697	122.891	72.8466	121.907	75.0651	127.12
	2017-04-04 19:35:00	83.5908	363.18	202.789	505.977	151.753	185.077	84.0503	136.884	365.903	1426.08	80.4885	136.405	75.5149	129.38	224.278	236.039	74.5175	124.979	1542.73	2525.27	125.261	160.395	73.3728	124.268	74.8817	123.033	75.4796	127.433	684.672	2684.36	78.6974	130.385	75.9662	125.113	75.7702	126.773	76.4548	126.603	322.215	967.392	80.2584	131.562	74.6393	123.554	75.7242	124.921	74.8184	124.751
	2017-04-04 19:40:00	84.758	346.51	210.761	524.95	155.737	190.441	73.8278	125.952	367.415	1433.41	81.8084	137.003	83.5046	142.012	224.145	238.373	73.9029	125.046	1533.27	2508.12	127.022	163.234	75.3516	125.436	78.6367	130.513	73.9905	125.358	609.072	2337.13	79.2106	131.871	73.9972	125.675	73.5553	125.391	74.0564	124.953	311.494	953.881	74.5805	125.107	74.6242	124.609	75.2391	124.659	74.2324	126.426
	2017-04-04 19:45:00	85.196	337.477	214.682	540.022	150.537	184.68	75.6911	125.821	367.077	1446.64	80.6793	135.178	73.4937	130.183	221.551	235.396	74.1601	125.537	1547.96	2535.41	149.293	171.91	73.8446	125.383	78.8908	129.618	77.7529	129.557	589.706	2266.46	73.5877	126.01	72.4885	124.072	72.6821	123.601	73.0824	124.414	309.379	945.429	72.894	121.975	78.2933	129.806	74.0434	123.58	75.1342	125.641
	2017-04-04 19:50:00	84.4068	315.477	220.635	555.546	156.491	188.519	94.9705	132.617	368.521	1447.74	82.1842	136.734	77.0612	129.64	224.789	237.384	76.4606	126.165	1533.58	2505.44	136.046	169.611	75.1685	125.534	74.5534	125.278	72.5422	122.866	599.426	2298.25	74.8568	123.726	77.0034	128.878	76.2589	125.817	75.8723	125.113	312.614	949.551	75.921	123.621	79.4329	132.318	76.7831	125.053	76.8815	127.394
	2017-04-04 19:55:00	84.6565	393.132	217.026	563.936	149.103	187.096	71.5778	123.969	367.083	1452.66	78.599	135.923	71.5886	130.278	229.248	249.861	70.8444	124.278	1540.15	2526.9	127.102	164.852	72.3575	126.272	71.5018	123.752	70.4671	124.168	585.45	2264.19	71.1304	124.301	75.7292	131.235	71.6415	127.444	77.3856	132.728	309.226	956.872	72.135	123.984	71.7616	125.329	71.4305	124.456	71.0007	124.815
	2017-04-04 20:00:00	85.3243	381.086	225.731	578.208	149.55	183.061	73.5256	124.929	368.304	1436.66	80.3652	137.223	73.1142	129.676	222.985	239.011	73.4655	127.963	1544.15	2536.7	134.581	169.714	77.2107	130.713	73.8249	125.355	77.4433	131.478	595.035	2267.89	73.948	127.192	71.6783	125.586	71.852	124.238	76.9117	130.408	309.262	942.99	72.8831	123.767	73.6216	125.184	78.6763	131.987	73.595	125.306
	2017-04-04 20:05:00	2886.75	6384.1	233.783	596.72	181.279	208.167	75.2684	124.575	377.484	1443.18	81.5911	136.761	77.123	131.61	239.647	249.519	75.1363	127.454	1777.96	2894.89	137.939	169.714	77.5464	127.202	74.7644	124.699	81.0693	131.945	1414.04	6841.82	782.2	4183.12	80.6632	131.862	82.3193	133.771	74.9563	125.745	310.489	947.985	74.4504	123.226	74.7686	123.399	75.1944	125.129	76.7141	126.297
	2017-04-04 20:10:00	3690.97	14616.9	236.191	613.518	213.068	232.902	71.5307	124.218	364.274	1427.84	78.9666	135.536	71.748	127.155	256.023	261.856	72.3643	125.48	2167.23	3548.61	146.229	184.947	65.4633	118.892	71.6555	123.763	70.8126	126.865	2325.57	11779	1565.89	8418.57	72.1666	128.01	64.8917	119.288	71.1834	124.362	330.373	972.276	72.6509	123.761	71.9316	124.242	70.9651	122.093	71.7231	125.271
	2017-04-04 20:15:00	6061.79	9792.98	238.773	619.63	194.647	217.155	74.1149	124.57	370.157	1442.15	80.4613	137.266	72.812	127.361	245.32	253.994	78.8714	131.53	1984.87	3252.8	141.678	173.819	93.3542	131.843	73.5242	122.901	73.0183	125.56	1684.85	8559.08	1020.81	5793.07	80.5971	132.863	73.0074	125.691	77.3117	129.017	315.914	960.356	73.1346	122.819	72.6366	122.57	74.3866	125.2	74.3359	125.916
	2017-04-04 20:20:00	84.0972	332.568	247.296	642.57	149.465	182.712	73.3371	124.828	363.454	1422.11	80.2424	135.864	94.8805	137.491	221.902	236.298	77.6215	130.7	1533.25	2506.84	141.174	174.983	74.0395	125.64	74.0072	124.87	73.7966	125.241	701.588	2804.5	89.5793	202.309	65.4721	117.665	73.5007	125.495	69.4746	119.932	308.967	949.186	76.5227	127.199	73.2196	123.956	78.2873	131.835	80.684	137.567
	2017-04-04 20:25:00	83.6044	400.319	256.203	664.693	149.442	185.343	71.1622	122.733	361.215	1421.78	88.1493	148.75	73.1618	130.263	219.941	235.62	71.3176	125.853	1520.26	2473.59	143.297	177.357	77.4028	131.567	71.7941	122.304	71.7979	125.442	663.251	2603.59	67.2863	118.653	72.3484	125.462	81.6918	138.618	71.1422	123.982	305.365	944.011	67.8653	119.108	71.8585	124.592	71.1796	122.596	71.4628	125.288
	2017-04-04 20:30:00	83.5448	357.308	252.923	669.866	149.867	185.949	73.0811	125.747	367.876	1444.54	77.8988	136.135	72.0917	127.373	221.147	237.519	72.733	127.211	1545.8	2532.48	145.679	177.575	75.5638	130.527	71.2199	123.034	71.516	125.481	598.871	2308.09	71.7511	124.229	71.6226	124.946	70.9839	126.785	72.1932	125.351	309.29	950.875	77.6698	130.72	71.7076	123.994	71.6956	125.241	72.8715	125.027
	2017-04-04 20:35:00	85.3429	332.672	265.74	689.849	150.794	183.659	83.1057	136.967	370.675	1438.19	82.1563	138.42	74.451	129.129	222.315	236.873	72.859	124.204	1531.28	2511.55	149.639	179.625	74.2316	126.542	74.5568	124.479	73.8155	125.161	593.271	2281.61	79.1019	131.388	94.3075	135.194	74.6301	125.96	74.6543	126.628	320.678	967.934	77.362	130.491	74.4665	124.727	75.7384	126.965	74.0765	126.135
	2017-04-04 20:40:00	84.7057	397.549	283.426	715.721	157.366	190.762	75.8576	125.365	368.154	1430.01	82.4205	136.884	85.5767	142.195	225.901	239.104	84.0965	133.829	1539.95	2520.67	153.393	180.373	76.88	125.761	91.359	141.94	83.6772	132.882	588.27	2248.99	80.5978	130.174	76.2196	125.622	75.9727	127.095	75.3303	124.776	308.306	941.025	75.5997	122.361	75.9064	124.294	75.8493	123.545	76.2273	126.176
	2017-04-04 20:45:00	84.1563	383.036	249.948	693.569	149.96	185.237	73.8435	123.822	365.952	1427.6	80.1595	134.996	74.5422	130.799	224.411	238.728	68.0141	118.699	1555.22	2562.2	152.84	181.372	73.6145	125.727	68.465	119.923	68.1746	118.983	607.664	2300.88	73.9014	125.233	75.0654	125.806	74.7706	127.473	73.7371	124.911	310.143	946.652	76.0418	125.81	79.1906	130.715	73.2696	123.599	73.7078	125.013
	2017-04-04 20:50:00	1457.26	4301.48	265.868	704.844	174.92	205.651	73.4437	124.279	363.542	1425.27	81.465	137.539	73.1722	128.885	233.757	246.383	72.2364	124.799	1698.92	2762.91	155.771	184.699	72.8568	123.518	71.7946	122.909	72.6247	124.485	1092.94	5002.99	530.525	2859.93	76.7127	131.132	72.5261	122.97	97.3861	139.406	308.307	947.391	76.9059	127.278	76.1984	129.984	74.5087	125.49	73.4886	125.013
	2017-04-04 20:55:00	2637.57	12301.1	271.658	738.156	203.818	226.781	70.2982	124.295	362.593	1443.55	76.5647	135.45	71.0552	131.671	259.041	271.521	70.4177	126.061	2066.04	3377.73	154.891	187.55	71.728	126.826	70.4747	125.472	68.9102	124.394	2131.69	10922.9	1431.45	8078.41	65.909	121.737	69.7056	125.082	72.8075	128.99	307.72	949.083	65.3761	118.77	71.0707	126.027	70.5417	123.328	70.845	125.344
	2017-04-04 21:00:00	8145.63	13920.5	265.055	721.037	211.955	227.673	75.2758	124.016	365.58	1412.42	82.5079	135.488	77.8243	130.477	257.4	260.944	76.4125	127.796	2142.21	3515.21	161.203	186.867	74.735	124.045	76.3352	124.314	82.4978	133.44	2235.77	11546.7	1474.93	8456.71	80.9537	133.653	76.5979	127.1	81.0293	132.065	314.375	956.852	75.8846	123.343	76.8205	125.73	79.9129	129.658	74.9953	124.354
	2017-04-04 21:05:00	6303.06	14460.8	281.506	755.562	218.106	234.981	74.7261	126.779	376.28	1435.64	80.4329	136.105	72.8313	128.535	254.126	261.295	72.9093	124.599	2153.58	3529.58	161.493	188.173	73.4947	125.566	72.2678	122.349	97.3633	139.196	2200.6	11105.7	1454.45	7828.01	77.2095	130.651	73.6625	126.235	73.6761	126.364	311.948	953.181	74.8801	125.115	72.6982	124.992	72.6066	124.883	74.2334	126.439
	2017-04-04 21:10:00	1411.24	3596.08	286.683	772.271	161.213	191.346	79.4736	132.231	366.104	1454.11	80.3791	138.267	73.0473	130.39	230.037	243.936	73.0744	126.703	1673.19	2718.52	172.084	203.822	74.6574	127.83	93.2475	131.435	71.9796	125.636	1094.68	5036.9	429.786	2055.51	72.5973	126.591	72.145	125.85	72.1243	124.94	310.025	947.223	71.9301	125.074	72.2457	123.043	74.2164	125.967	73.1355	125.856
	2017-04-04 21:15:00	84.9506	404.022	296.659	798.184	151.9	184.014	68.8476	117.513	366.254	1414.15	82.4239	137.624	77.3169	129.969	225.704	237.509	80.3056	132.699	1529	2486.21	167.678	192.141	75.4988	125.65	77.6702	125.859	77.2066	127.033	683.584	1721.84	82.3967	157.067	76.4763	126.307	76.4696	126.853	76.312	125.283	316.001	956.183	74.9866	123.469	76.8101	125.261	75.6807	124.151	75.2073	123.609
	2017-04-04 21:20:00	84.679	369.741	297.157	793.241	153.428	188.161	74.8733	127.575	367.253	1426.26	80.8396	137.445	73.4713	130.102	222.053	236.435	78.68	132.872	1536.68	2512.56	166.998	195.177	72.6026	124.896	72.4293	123.273	72.9197	126.208	652.051	1540.61	72.574	125.351	73.554	126.461	73.0623	127.349	73.0599	126.1	307.779	946.761	75.7817	126.971	72.7481	124.399	77.376	130.601	81.62	138.681
	2017-04-04 21:25:00	84.6723	370.626	306.074	823.224	148.058	182.916	71.7721	123.904	363.665	1430.77	87.9713	148.322	72.4926	129.376	223.202	240.727	72.251	126.231	1547.18	2542.17	168.432	194.227	76.9276	132.314	72.1149	123.7	72.3212	125.406	588.371	1252.56	92.1997	133.324	70.8115	123.452	81.0575	135.984	72.2831	124.101	310.633	957.765	71.4939	122.334	71.7864	122.232	73.8027	124.869	72.7555	125.483
	2017-04-04 21:30:00	83.5763	383.836	305.431	836.955	147.483	182.404	71.3	124.288	364.433	1427.73	79.4926	136.792	72.3068	129.742	219.17	235.154	70.4566	124.331	1530.74	2517.19	168.643	194.055	76.6282	131.123	73.6062	125.198	71.6347	123.721	586.822	1261.22	72.2906	124.59	72.5998	126.559	71.6112	126.079	72.8165	125.587	309.622	948.927	76.2993	130.929	71.9904	122.724	71.7283	123.673	75.6031	130.737
	2017-04-04 21:35:00	84.504	410.92	308.778	834.686	152.399	184.567	84.8173	138.58	369.647	1429.98	81.0108	136.967	75.5935	130.093	222.235	235.439	75.5563	126.306	1535.67	2496.4	174.481	196.592	73.8048	126.41	73.7516	122.178	74.8103	125.67	586.181	1242.65	78.4914	128.738	75.5045	127.436	73.8138	125.799	73.8362	123.869	319.545	961.833	79.1358	131.929	74.6134	124.208	74.065	122.928	70.2242	122.64
	2017-04-04 21:40:00	1057.86	3513.81	314.37	857.473	172.617	203.335	74.858	127.442	367.817	1418	79.8365	135.711	83.9458	142.369	231.074	242.214	74.3001	124.3	1655.73	2690.27	176.448	200.138	75.0848	127.135	77.3128	128.918	73.2632	123.288	1035.02	4666.37	471.552	2355.64	74.395	126.067	74.4241	126.019	74.0334	125.339	306.388	939.163	74.3804	124.201	74.0555	126.668	77.7627	127.192	75.7748	126.603
	2017-04-04 21:45:00	3553.09	8688.94	328.088	899.611	185.881	211.804	71.7715	123.507	365.557	1414.83	80.8281	136.793	73.1079	129.268	246.317	254.808	73.1237	126.248	1886.58	3077.41	178.653	200.749	73.735	125.422	78.9144	133.085	73.8829	126.981	1648.68	4139.24	918.116	5289.54	72.235	124.307	73.5596	125.76	73.5503	126.294	311.526	951.442	72.4367	122.569	77.9437	129.786	70.6974	122.461	72.7692	126.472
	2017-04-04 21:50:00	2988.24	8069.01	331.617	900.938	189.424	216.585	73.1155	124.58	366.756	1420.25	80.0782	137.316	72.5966	128.951	240.435	250.855	72.9284	125.825	1870.44	3069.37	177.81	200.672	71.6619	123.895	72.3918	123.759	72.8343	126.083	1566.27	4811.23	821.107	4910.55	72.2779	124.289	72.0992	125.757	83.9392	134.016	317.445	963.497	72.6097	122.563	76.8927	130.988	73.7886	123.456	71.5019	123.705
	2017-04-04 21:55:00	5048.29	9617.2	359.006	927.657	191.493	214.418	74.3107	125.179	367.776	1432.62	81.0105	136.386	74.9099	129.821	253.976	264.693	74.4513	125.325	1922.7	3174.6	182.786	203.482	74.1856	125.334	72.8595	123.565	73.162	123.347	1790.55	4985.64	1021.87	5810.67	74.6203	127.115	73.4436	126.373	65.9801	119.488	302.348	936.629	74.9274	125.867	73.2442	124.234	71.1712	123.317	73.7144	124.369
	2017-04-04 22:00:00	1629.65	7753.33	328.082	908.268	183.573	208.112	72.295	124.61	365.76	1417.7	77.9972	133.697	72.8609	127.942	240.075	250.439	71.9983	123.802	1866.78	3063.13	183.919	204.954	72.5492	123.584	72.0773	123.629	78.0408	131.789	1531.93	4754.53	789.189	4580.95	76.0432	129.609	73.2634	126.501	78.8828	132.508	309.062	949.848	71.9183	121.898	72.4825	124.199	78.8718	130.6	73.7665	126.075
	2017-04-04 22:05:00	8519.22	12037.9	341.648	934.672	202.969	221.367	74.351	124.138	376.029	1450.75	81.8475	136.673	75.6054	129.547	251.589	259.547	74.427	125.695	2057.4	3386.3	185.979	205.723	74.5197	125.711	76.0068	125.097	78.2119	131.489	2060.57	6059.46	1265.22	7391.75	78.0792	131.059	73.2666	124.51	72.5314	123.923	312.497	952.053	73.6367	122.859	74.9284	125.349	73.7245	125.752	73.4727	123.582
	2017-04-04 22:10:00	4423.83	9805.98	331.438	926.729	196.133	218.409	72.7026	125.14	369.335	1459.94	83.8733	141.713	72.4836	128.203	247.813	255.786	72.5194	125.391	1930.4	3180.91	196.821	220.375	73.1127	125.957	71.5805	123.867	72.214	126.037	1900.18	4638	1226.34	6588.21	74.1013	127.229	73.3126	126.384	71.83	123.931	308.22	946.84	72.9817	123.664	71.8438	124.544	71.9347	123.308	72.4344	124.771
	2017-04-04 22:15:00	7566.89	10060.4	333.01	935.97	194.402	216.795	74.0517	124.662	364.884	1450.41	75.5988	131.459	74.2598	129.623	246.878	255.337	78.2005	131.542	1945.08	3203.58	191.707	211.52	74.1562	126.065	72.8879	123.427	74.0708	125.056	1840.55	4432.85	1121.7	6133.35	74.0104	126.463	102.361	143.243	75.9402	128.261	317.308	961.112	74.7759	124.62	73.9261	124.522	74.6102	123.762	74.863	126.982
	2017-04-04 22:20:00	4232.54	9603.17	346.93	969.552	196.23	218.517	73.4185	123.428	366.253	1458.43	81.3132	136.989	74.8641	130.647	248.553	257.096	77.3088	132.049	1964.76	3250.75	191.033	212.277	73.1301	125.159	74.4331	124.405	73.018	125.806	1779.29	4757.15	1058.33	5499.29	72.5808	124.488	65.272	118.127	72.6074	125.054	313	955.271	72.8368	124.152	74.4013	126.047	78.3855	130.046	81.369	137.409
	2017-04-04 22:25:00	1450.85	3757.42	371.161	1011.98	171.487	199.39	85.5592	138.967	371.735	1478.13	90.4712	147.28	74.4212	128.545	232.991	244.44	94.8824	135.092	1663.17	2722.15	195.602	212.464	80.0497	132.106	74.6407	124.713	74.5735	126.42	1060.9	4656.66	485.246	2648.86	75.3887	125.965	84.5939	139.345	73.7236	125.033	311.953	953.928	74.3623	123.097	74.0114	123.173	74.2882	123.385	74.7735	126.091
	2017-04-04 22:30:00	89.7923	418.163	358.465	1008.71	145.325	179.077	62.5195	115.499	370.801	1489.99	81.3292	139.09	72.7214	129.995	223.868	238.479	75.9206	127.682	1557.66	2528.43	193.753	212.413	76.4748	130.606	72.363	124.485	73.5838	126.423	629.206	2308.67	72.3096	157.666	72.678	124.853	71.9084	125.389	72.8392	125.86	309.843	950.359	78.1817	130.197	72.3266	123.748	73.2031	124.701	71.5969	123.91
	2017-04-04 22:35:00	84.6869	409.12	372.215	1038.72	150.838	184.872	82.8869	137.6	372.248	1488	78.4787	135.68	75.2961	130.571	223.574	238.395	71.9821	123.224	1543.21	2514.39	199.751	218.426	73.5208	125.84	73.7288	122.972	73.3613	124.419	627.855	2292.38	78.4509	130.122	73.4417	124.348	73.1278	125.114	74.9204	126.843	322.202	976.371	77.9405	131.578	80.3232	131.693	73.8045	123.181	76.1506	128.612
	2017-04-04 22:40:00	85.7132	412.193	367.328	1021.74	157.261	191.63	74.1199	126.724	369.204	1490.83	81.9742	138.36	83.969	143.305	224.006	238.955	74.5525	125.313	1537.28	2520.21	200.539	215.614	75.2573	126.265	80.1552	132.281	74.7135	125.943	623.272	2273.96	79.6356	133.414	74.6934	126.485	75.2568	127.491	75.2045	125.829	312.191	944.841	74.2902	123.668	69.1326	118.177	75.4452	126.158	73.8336	125.322
	2017-04-04 22:45:00	3034.81	7660.45	373.389	1052.34	182.952	209.7	74.4586	124.888	369.317	1493.31	81.5532	136.666	74.4424	129.909	243.452	252.225	74.6137	125.659	1809.36	2976.92	203.484	217.346	74.2335	125.649	78.6751	129.167	75.3926	125.483	1516.3	1586.35	896.668	5124.06	74.6095	125.395	74.5224	127.034	73.8934	124.407	310.293	949.52	74.4019	123.225	78.9053	130.635	74.0968	122.328	73.8999	124.872
	2017-04-04 22:50:00	4109.99	8946.65	389.473	1076.71	195.187	220.413	73.7803	124.055	366.923	1488.53	79.4607	137.352	73.5913	128.856	246.658	255.225	73.5309	124.802	1904.47	3118.61	203.956	219.281	72.3983	124.267	71.8354	122.814	72.0651	126.647	1748.15	1707.16	1048.82	5628.76	72.5478	125.85	73.9212	127.504	73.1299	125.765	311.425	955.795	73.1414	123.02	75.5411	130.461	73.0898	124.279	74.4048	126.079
	2017-04-04 22:55:00	5065.5	9545.78	338.838	1006.57	191.976	212.878	71.6099	122.902	365.585	1474.66	79.0688	135.249	72.0698	126.463	256.709	268.149	71.9494	125.001	1938.24	3169.71	206.019	220.453	74.01	125.327	72.1812	122.621	72.7083	123.718	1811.99	1275.6	1099.03	5978.32	77.8745	131.482	71.4244	122.639	76.5562	130.071	313.221	956.443	72.2408	121.328	73.5085	122.357	72.8869	124.136	72.7524	125.44
	2017-04-04 23:00:00	4493.88	9767.72	383.765	1082.53	197.661	216.64	75.4264	124.705	374.429	1496.02	82.7133	136.91	76.1389	128.821	253.193	257.266	74.8832	124.013	1919.63	3174.75	210.039	221.282	74.1715	123.588	75.7588	123.158	80.3522	131.661	1864.38	1626.07	1213.65	6829.67	73.6921	124.136	75.0425	126.308	80.0042	130.976	309.842	940.08	82.0667	129.636	75.0449	122.752	79.897	129.797	73.8438	123.186
	2017-04-04 23:05:00	5106.98	7339.06	401.219	1121.37	185.932	208.518	76.6482	126.634	378.396	1511.92	81.2196	134.589	76.9655	130.388	245.121	254.163	76.3918	125.881	1847.15	3033.99	213.182	225.502	75.5005	125.631	75.067	124.547	79.763	132.027	1547.81	2588.25	894.055	4804.96	80.5054	134.008	76.7285	127.575	74.8971	125.501	312.377	952.71	70.0799	118.236	75.0668	123.743	75.2938	125.233	75.7148	126.1
	2017-04-04 23:10:00	364.338	11592.4	397.598	1123.89	201.945	223.946	71.2546	125.743	363.984	1479.07	82.4237	141.795	71.5877	130.153	253.541	263.222	71.8725	126.144	1987.6	3262.8	220.156	238.685	72.2654	126.023	71.432	124.39	71.5772	128.11	2121.66	10928.5	1360.2	7331.59	71.9314	127.751	71.0997	127.762	72.2538	127.28	308.007	949.528	70.7059	122.704	71.8282	125.891	71.2472	123.901	72.631	125.787
	2017-04-04 23:15:00	2934.96	7093.35	383.683	1105.18	181.097	208.475	71.6917	124.281	369.559	1479.19	75.9818	133.29	73.8796	131.186	260.095	256.667	80.4694	136.113	1838.93	3040.14	213.915	227.223	72.5918	124.619	73.3108	123.864	71.8317	124.61	1457.3	7183.4	806.248	4482.51	71.738	124.464	71.5281	123.607	72.4265	125.009	316.839	959.431	72.4015	124.927	72.7796	126.556	72.7279	124.71	71.5575	124.82
	2017-04-04 23:20:00	429.567	1271.39	426.711	1171.71	155.543	187.294	75.0722	127.68	368.369	1482.48	80.7124	137.232	74.3246	129.239	226.792	239.988	75.4831	130.174	1576.16	2601.39	216.218	231.665	73.211	124.598	73.0635	123.156	73.6335	125.833	748.823	3062	189.419	905.057	74.0639	126.711	74.644	129.345	73.0493	125.359	316.131	974.747	80.5305	131.791	73.3102	124.977	78.5843	130.424	82.3232	138.409
	2017-04-04 23:25:00	84.8084	389.352	423.662	1185.93	151.037	184.061	74.2622	125.086	364.133	1476.54	89.6425	148.052	74.0671	128.323	223.145	237.542	72.9796	124.418	1559.52	2573.51	220.118	231.475	79.7982	132.521	75.0532	125.091	74.0765	125.179	634.076	2309.52	74.9873	136.184	75.3665	126.674	84.1574	138.9	74.6597	126.102	312.426	954.663	68.2894	117.413	74.7173	123.626	73.6516	122.885	75.8326	127.584
	2017-04-04 23:30:00	84.7242	420.888	424.62	1194.25	148.921	185.997	69.9765	124.209	358.747	1465.52	78.408	138.29	71.5652	128.864	220.15	237.738	70.3067	126.406	1547.61	2552.28	218.649	232.028	74.9471	131.713	75.1459	129.392	70.0281	124.795	624.63	2287.56	71.4896	125.299	69.6509	126.262	69.1026	126.833	70.7338	124.766	314.504	975.913	74.1169	129.736	70.8002	126.248	70.9769	124.883	70.1472	125.912
	2017-04-04 23:35:00	7366.16	12180.4	417.283	1187.04	205.341	225.372	84.333	138.355	368.323	1490.74	80.3723	136.467	75.0512	128.672	255.562	260.094	74.273	125.272	2010.58	3309.87	222.67	234.888	73.742	126.004	69.5161	118.462	74.4528	124.941	2162.36	11386.2	1395.39	7423.09	74.1049	124.728	74.5115	125.038	73.3676	124.645	319.594	968.702	78.4352	130.533	74.116	124.432	74.073	123.003	74.0256	123.874
	2017-04-04 23:40:00	7257.75	13291.2	424.922	1206.09	222.37	242.412	73.4918	127.614	369.961	1514.54	102.272	146.152	83.4537	141.12	259.061	262.805	75.0786	126.15	2052.61	3367.44	225.473	236.15	74.7692	125.197	78.6456	130.288	74.5739	125.183	2250.84	11459.8	1522.33	8109.17	75.009	125.752	74.7279	126.242	74.6032	125.627	310.635	947.827	75.1368	125.426	74.5289	124.634	74.2802	123.11	73.4435	125.552
	2017-04-04 23:45:00	7416.02	14511.7	427.317	1214.74	203.221	221.291	72.4238	122.093	365.063	1492.34	79.8652	135.571	73.1141	128.484	257.826	261.714	72.8892	124.583	2140.88	3527.21	225.627	235.718	72.9942	123.253	76.5862	127.957	72.8815	124.779	2231.14	11552.3	1491.03	8212.73	72.7904	124.145	71.662	123.831	74.1186	125.158	318.974	963.81	72.7991	122.444	76.3345	127.566	73.2354	123.969	74.5864	126.978
	2017-04-04 23:50:00	7457.51	20739.5	429.34	1234.61	244.634	256.701	71.7797	123.795	364.49	1491.66	78.6566	136.368	72.3991	129.254	271.587	273.039	72.0284	125.227	2402.62	3939.94	225.976	238.103	71.0065	123.917	71.5411	125.661	70.8471	123.764	3026.43	15736.5	2177.35	11886.1	70.8458	124.37	71.6133	125.875	70.3832	124.449	300.404	938.367	71.239	122.809	75.7899	133.179	72.0989	124.839	71.318	124.598
	2017-04-04 23:55:00	1077.48	1459.08	451.783	1274.55	152.871	186.917	72.9745	125.78	368.818	1494.81	79.4103	136.04	73.0929	129.211	233.136	252.938	72.6272	126.857	1559.15	2553.39	229.029	239.988	73.4911	126.566	72.2166	123.578	74.4707	127.322	714.82	1795.96	153.228	587.557	72.9907	125.399	73.3419	126.114	78.4292	132.061	310.281	953.827	72.1114	123	73.8133	126.075	73.1617	124.119	72.3087	124.868
	2017-04-05	597.811	1472.83	420.851	1189.4	152.637	184.937	74.7489	124.282	372.191	1510.44	81.8106	136.573	75.5008	128.87	224.239	238.299	74.9103	126.372	1536.08	2509.91	235.046	241.987	74.4573	124.99	75.1115	123.522	78.8942	131.04	628.075	1288.47	74.7952	127.985	78.3348	131.508	75.4716	126.61	80.4892	132.546	312.958	959.571	106.281	144.217	73.5702	123.711	78.7194	129.803	75.1587	124.945
	2017-04-05 00:05:00	607.696	1423.1	459.125	1298.72	150.37	186.305	72.7603	125.567	374.359	1507.45	78.7142	135.219	72.0632	127.85	223.167	240.213	75.6251	130.599	1535.71	2506.84	228.625	238.865	71.7541	124.379	71.8995	123.345	76.2242	130.579	629.133	1299.92	71.9357	124.407	76.1439	131.59	71.4218	127.182	70.752	126.262	315.049	968.489	62.6063	114.154	72.7036	125.567	71.8186	127.094	72.3091	125.497
	2017-04-05 00:10:00	599.907	1421.8	458.07	1293.99	149.008	183.379	72.3242	125.177	364.526	1492.69	79.8131	135.49	73.7757	129.969	221.526	236.094	69.5623	121.279	1542.43	2539.66	242.889	255.076	73.6484	124.977	72.9064	122.648	74.2192	128.318	624.078	1276.77	73.591	126.504	73.9821	126.334	72.3062	123.567	73.3715	124.714	313.326	965.016	71.6877	121.626	74.2841	125.129	74.2894	124.156	92.5396	133.164
	2017-04-05 00:15:00	602.14	1470.58	474.532	1343.48	149.06	185.261	73.4849	126.427	365.506	1512.45	77.9255	135.819	72.2496	129.944	222.922	237.604	75.1234	131.641	1537.79	2526.75	236.503	244.739	70.9597	124.429	73.0715	123.662	72.6992	125.044	631.654	1294.68	69.8771	123.764	72.8516	125.704	74.1463	127.744	73.1384	126.472	320.411	984.66	73.6064	125.365	72.2318	123.461	72.1339	123.13	73.1642	125.02
	2017-04-05 00:20:00	604.02	1383.99	473.565	1339.02	153.073	186.604	73.6101	125.958	370.406	1511.97	81.7417	136.682	74.6218	128.63	224.474	239.989	80.7042	133.08	1542.34	2525.85	239.619	247.887	74.4889	124.557	72.1719	122.948	72.2666	125.605	625.166	1288.38	79.0449	128.635	72.1718	123.869	72.4847	126.041	72.615	125.699	310.622	959.858	73.499	125.073	72.3606	123.073	76.9705	128.886	82.1183	143.263
	2017-04-05 00:25:00	1180.71	1397.78	485.967	1369.23	150.997	184.289	73.6483	124.165	372.312	1509.28	90.7724	149.527	75.1119	130.023	222.563	236.476	72.6849	124.243	1543.79	2514.16	244.163	248.751	79.9698	132.802	74.8076	124.489	74.8023	124.755	632.47	1280.47	70.4981	121.562	74.7422	125.033	83.2322	138.494	79.6179	129.109	313.978	956.39	73.6409	122.018	75.0577	124.666	75.2902	124.814	74.0574	126.561
	2017-04-05 00:30:00	605.201	1406.13	487.814	1387.17	146.947	183.207	71.8515	126.008	367.91	1504.79	78.6783	136.915	72.7066	130.706	219.853	236.461	72.1776	126.932	1546.67	2551.02	243.514	250.621	75.6909	131.141	72.0445	124.254	71.358	125.716	610.873	1246.21	70.8664	124.065	71.5175	126.227	71.5799	126.37	65.3344	118.936	324.679	989.607	74.9971	130.843	71.7829	125.723	91.3767	131.859	71.3104	126.187
	2017-04-05 00:35:00	376.223	1435.33	485.463	1382.81	173.75	194.067	83.8387	137.986	363.029	1484.95	79.2247	136.629	73.1398	127.302	224.903	239.369	73.9025	126.432	1542.92	2532.72	246.521	250.427	72.7139	124.88	72.3684	122.756	81.1893	132.911	626.531	1286.53	77.4708	130.375	73.1468	124.577	73.3428	126.924	74.2418	125.14	312.168	958.583	78.6518	130.882	73.0509	123.295	73.6779	126.67	74.1178	124.905
	2017-04-05 00:40:00	367.243	1409.27	491.642	1383	155.646	190.624	72.6575	125.177	369.437	1522.73	81.3002	136.407	82.7991	139.658	222.811	235.836	73.1445	124.334	1544.39	2533.72	250.149	253.952	75.1011	126.512	78.3953	130.005	66.1019	116.674	619.949	1264.53	79.3459	130.203	74.3512	125.006	73.9665	125.808	74.147	125.053	308.916	945.714	74.1998	124.737	73.4831	123.083	73.3897	123.912	74.1967	126.338
	2017-04-05 00:45:00	366.096	1400.05	502.466	1403.07	151.927	184.819	74.6487	123.931	370.609	1499.53	82.2306	137.264	76.7477	131.651	224.786	239.084	75.5853	125.224	1554.39	2571.23	243.016	247.73	74.7736	124.514	79.7058	129.292	75.532	125.374	629.697	1288.82	73.8381	123.813	75.1001	125.168	81.9292	133.72	74.8476	124.711	315.812	961.847	74.3069	123.303	80.7863	130.56	76.6088	124.712	74.9899	124.662
	2017-04-05 00:50:00	374.202	1393.09	485.764	1381.14	155.575	191.482	75.2673	127.583	368.981	1528.81	79.5991	136.269	73.6681	128.146	221.405	236.041	74.4385	126.897	1550.97	2557.18	259.757	260.896	72.9552	125.005	73.3863	125.24	73.0036	124.038	625.525	1279.5	73.1286	123.74	73.3002	125.487	66.8694	119.784	72.5102	124.445	313.678	971	74.4182	124.545	77.4388	131.395	72.7464	122.904	72.3245	124.265
	2017-04-05 00:55:00	361.569	1429.98	522.943	1463.31	149.157	186.408	69.9405	123.792	364.599	1497.46	78.8171	136.827	70.3335	127.734	231.306	251.695	70.4733	125.237	1546.05	2543.64	245.79	250.979	71.0489	124.594	69.8067	123.445	71.5394	124.642	625.855	1291.7	70.4626	124.391	77.9541	135.364	70.885	126.41	77.7769	132.618	312.021	968.219	71.0767	123.203	70.2082	123.501	70.8182	124.158	72.6611	128.371
	2017-04-05 01:00:00	346.064	1419.22	503.61	1449.7	149.054	183.334	72.0053	123.245	368.328	1504.53	79.9854	137.671	74.4398	129.683	223.584	238.807	72.8423	125.451	1531.18	2519.32	257.018	258.404	73.198	124.765	73.2316	125.496	77.5902	131.892	620.973	1271.16	73.7156	125.255	68.9363	122.404	72.0519	125.024	76.9848	131.273	315.427	966.428	72.0492	123.468	74.1511	126.33	79.8137	133.076	72.9551	124.592
	2017-04-05 01:05:00	657.646	1363.22	519.21	1482.3	150.133	184.088	74.0397	126.137	377.216	1520.06	78.3829	133.764	72.9472	128.615	221.634	237.41	73.0119	125.308	1559.56	2545.58	257.557	259.169	72.5319	124.988	72.9599	123.472	77.1021	131.214	624.478	1278.14	71.9314	124.425	77.7661	131.165	72.3615	125.997	71.2992	124.788	310.217	956.24	71.811	123.054	72.2992	124.879	71.2674	123.531	71.3953	124.081
	2017-04-05 01:10:00	575.109	1417.47	528.747	1503.11	152.665	187.29	73.9875	125.254	367.77	1529.91	80.9737	136.518	74.6712	129.34	225.058	238.532	74.3179	126.242	1534.25	2521.74	275.164	278.89	74.2548	125.843	73.4241	125.473	74.2112	126.876	622.569	1273.09	72.9201	124.469	74.7247	127.006	75.3122	127.918	75.6338	127.356	315.785	973.718	75.7413	128.842	93.615	133.874	73.6459	124.12	74.8004	127.238
	2017-04-05 01:15:00	237.525	1453	533.51	1520.45	148.572	184.819	70.7132	124.047	367.843	1502.72	79.0764	139.33	71.3694	128.953	222.316	239.367	76.3484	132.775	1535.71	2535.45	258.785	262.517	71.2602	124.816	71.3819	123.822	71.0008	125.393	636.556	1305.88	72.0187	124.72	70.5801	124.595	91.4338	133.027	71.0474	125.484	321.324	983.816	71.0497	125.029	72.5718	124.791	72.295	124.868	72.3619	125.572
	2017-04-05 01:20:00	265.938	1397.01	537.347	1528.3	152.665	186.263	74.0392	124.363	367.939	1511.98	81.3247	135.814	75.9555	130.44	224.543	236.491	78.7428	131.837	1549.28	2542.02	265.951	265.005	74.8366	125.117	75.861	125.275	74.1338	125.661	630.424	1281.78	94.7295	131.35	74.2624	124.945	73.5593	124.612	73.6763	125.285	313.277	964.751	73.238	123.711	74.9248	124.062	79.4974	130.911	81.9957	137.838
	2017-04-05 01:25:00	270.575	1410.98	549.776	1546.53	173.467	191.631	77.1089	125.905	371.62	1510.2	91.8794	148.945	76.65	129.208	225.573	239.054	75.239	126.329	1547.6	2540.05	268.457	264.583	79.4389	131.708	74.4105	122.872	76.4064	124.92	624.239	1281.81	76.0992	126.487	76.2561	125.97	86.5618	140.846	75.7761	125.613	314.051	958.332	79.7338	128.974	75.0518	123.72	74.8353	122.719	74.9168	125.057
	2017-04-05 01:30:00	404.85	1437.5	532.496	1522.47	148.879	184.071	71.1512	124.481	371.871	1534.23	78.5355	137.876	71.0037	128.814	221.462	238.44	72.1046	125.448	1541.87	2544.4	268.963	269.195	76.4148	131.681	70.6243	122.666	70.7502	125.324	621.45	1269.07	71.0317	123.328	71.1966	125.681	70.5355	126.517	72.0372	126.462	310.625	966.851	73.3238	127.949	71.93	124.597	71.3406	122.956	73.8323	127.904
	2017-04-05 01:35:00	265.468	1370.66	550.467	1682.07	151.673	182.914	83.6793	137.251	365.052	1480.14	80.3813	136.1	76.0289	130.634	223.974	236.882	73.8421	124.82	1551.4	2550.82	273.923	270.428	74.8368	127.679	76.3302	130.763	74.2526	124.595	625.11	1282.6	79.4849	131.989	75.4086	125.92	74.2988	126.711	74.1635	124.466	327.637	979.655	78.2677	129.795	75.5509	124.292	76.7144	124.769	74.3443	124.518
	2017-04-05 01:40:00	268.99	1400.6	554.893	1592.11	157.12	193.754	74.7789	125.377	363.634	1489.58	82.6593	138.175	85.0461	140.839	224.122	238.649	75.7443	127.374	1538.99	2532.2	273.444	271.359	73.7549	124.135	78.6846	129.848	75.7561	127.055	626.176	1277.54	78.097	130.383	74.6129	126.868	74.8668	127.671	74.9631	128.664	312.373	961.802	74.3905	124.962	74.1351	125.355	73.4032	122.929	74.277	126.438
	2017-04-05 01:45:00	265.754	1445.18	548.321	1569.97	151.541	184.94	75.7086	125.818	374.972	1535.84	81.0234	134.337	74.5434	129.829	225.846	239.492	75.3871	126.021	1536.79	2490.65	279.625	272.883	76.3824	126.767	79.348	129.146	74.2308	123.939	626.394	1281.24	75.3929	126.538	75.6445	125.65	75.5504	125.453	75.5011	125.577	321.931	984.947	76.7686	125.109	80.4033	130.775	75.0849	124.463	75.5362	125.787
	2017-04-05 01:50:00	265.754	1388.86	541.019	1559.07	155	190.61	71.7204	123.378	372.252	1522.11	79.3577	135.191	72.5541	128.908	221.913	237.406	71.9014	125.662	1546.79	2544.25	276.347	273.685	72.0244	125.559	71.6163	126.157	71.9899	125.038	629.668	1302.16	72.3605	123.724	76.9427	129.626	72.554	127.89	72.9004	124.825	312.787	958.156	71.6461	122.966	75.4174	129.541	72.6158	123.431	72.669	125.183
	2017-04-05 01:55:00	266.039	1411.15	569.811	1635.25	151.017	183.545	74.353	125.426	370.008	1521.07	80.5699	136.48	74.6305	129.501	239.549	256.78	72.4875	123.767	1552.75	2561.25	279.363	273.971	74.1114	127.765	74.4422	124.932	73.7559	123.994	625.623	1277.89	73.7013	124.377	73.2764	126.358	72.7238	124.22	77.4528	130.393	315.706	970.895	93.6319	129.237	74.2538	124.769	74.1598	124.036	73.9967	125.888
	2017-04-05 02:00:00	265.996	1383.83	552.551	1592.37	148.186	183.341	77.9902	130.614	367.887	1509.02	78.7741	135.108	72.5032	129.654	215.667	232.262	73.2589	126.301	1533.91	2509.6	288.092	282.93	72.4112	126.895	72.1386	122.887	77.9173	132.22	624.738	1279.06	72.4834	124.558	70.8521	126.027	73.2595	126.229	76.8803	132.03	364.524	1186.41	74.2994	126.921	71.7685	123.795	97.1082	136.568	71.7059	123.665
	2017-04-05 02:05:00	268.822	1382.97	570.233	1633.45	152.57	186.247	67.2357	119.466	376.692	1515.95	79.4241	137.72	73.3893	129.407	221.732	237.643	73.5703	125.238	1539.96	2523.9	276.839	273.005	72.2867	124.424	71.83	122.097	76.967	130.934	621.221	1268.58	72.1707	123.56	81.943	136.926	73.0199	125.731	73.9071	128.215	360.897	1186.39	72.0983	121.872	80.2096	131.958	73.1854	125.852	74.3217	126.918
	2017-04-05 02:10:00	268.862	1384.58	589.304	1691.47	149.832	182.3	73.1129	123.188	364.71	1499.23	81.5107	137.425	74.921	130.017	243.814	244.57	73.0717	127.141	1533.15	2502.68	292.694	289.488	75.2839	127.998	74.1294	124.097	73.5329	126.674	629.31	1301.66	74.5807	126.697	69.5035	120.629	72.9838	126.604	72.7391	123.732	368.759	1196.11	72.7288	122.855	66.9734	117.865	74.2549	125.241	73.8226	125.026
	2017-04-05 02:15:00	550.599	1401.38	590.795	1692.88	147.773	186.58	71.1075	125.141	358.938	1469.94	76.9839	137.112	71.2249	129.54	220.492	238.848	76.5581	133.872	1518.58	2479.1	285.402	281.82	69.842	124.648	70.464	125.166	71.1949	126.559	627.63	1292.53	69.6932	123.741	70.4121	125.784	69.8688	124.722	70.2032	124.576	368.988	1203.6	70.4587	124.329	69.8343	123.14	70.0582	124.473	69.3031	123.42
	2017-04-05 02:20:00	549.366	1383.54	589.241	1679.16	151.277	184.254	74.3801	124.091	368.448	1515.91	80.5869	134.882	75.044	128.449	222.543	236.434	78.8835	133.188	1549.34	2516.04	290.877	282.954	73.8263	123.986	73.3788	122.114	73.8795	124.877	626.128	1281.14	73.797	123.799	75.7744	126.949	80.756	133.338	76.0139	125.991	364.919	1188.68	75.5661	126.707	74.7247	124.656	78.1221	127.843	83.0654	139.586
	2017-04-05 02:25:00	274.703	1447.64	608.503	1729.35	150.979	185.498	73.3078	125.096	365.333	1510.06	90.1611	151.07	72.8816	129.59	223.619	239.172	72.8578	125.742	1518.81	2469.91	291.597	283.739	78.4432	133.371	72.9922	123.338	73.5863	124.569	622.117	1261.15	73.7382	126.543	72.2914	124.937	76.4402	133.037	72.5451	124.116	368.898	1183.92	72.1035	122	72.7384	123.821	74.1661	124.216	74.3877	125.969
	2017-04-05 02:30:00	377.448	1411.21	605.512	1741.3	148.384	184.354	71.65	126.611	368.319	1503.87	78.8143	137.101	72.8044	129.908	220.947	237.893	71.5922	127.779	1536.24	2503.51	291.101	285.464	76.9394	134.449	72.9242	125.266	71.4567	125.66	634.834	1302.78	71.6022	125.014	71.9769	125.864	15223.8	48304.7	15220.9	730.25	361.995	1192.6	77.2255	130.541	71.6132	125.375	71.6364	124.806	72.9063	128.586
	2017-04-05 02:35:00	517.41	1352.66	598.679	1731.83	149.545	184.671	81.7643	139.477	358.189	1398.89	78.2912	137.611	73.691	129.606	221.897	236.758	72.3126	125.516	1539.91	2524.96	296.37	288.026	71.9271	125.671	71.2361	122.869	254114	4486.26	622.719	1285.42	76.1442	129.389	72.5766	125.969	238323	445517	237527	4712.35	367.774	1186.52	76.6687	133.834	82.9548	135.151	71.3407	123.671	70.0837	122.963
	2017-04-05 02:40:00	265.73	1237.96	618.401	1783.89	154.116	193.752	70.5411	125.945	364.153	1407.59	77.7115	138.503	79.7258	141.879	220.818	238.859	71.429	125.724	1541.44	2551.42	295.1	289.459	70.1176	125.204	74.522	129.414	3504.81	226.563	610.838	1251.46	75.1352	130.892	70.6877	126.088	4104.54	5469.72	4896.83	274.521	358.479	1186.55	69.694	123.378	59.8344	111.92	71.9583	130.225	72.0062	125.842
	2017-04-05 02:45:00	264.841	1250.08	605.273	1754.24	150.935	185.105	74.1425	124.751	368.345	1394.47	80.9251	133.927	75.3425	131.461	223.928	236.94	73.3076	123.938	1545.32	2534.61	301.396	289.724	74.8322	124.104	80.5479	132.597	74.2799	151.121	620.448	1264.52	73.982	125.401	74.1725	124.88	76.8524	176.735	76.1973	179.448	362.908	1181.1	74.824	124.655	79.2889	130.654	75.1266	124.277	94.7377	132.973
	2017-04-05 02:50:00	268.627	1251.34	614.09	1770.34	155.714	190.828	74.5675	125.224	367.257	1395.78	81.6036	136.385	75.6719	129.445	223.359	237.989	74.8513	127.748	1550.18	2542.67	302.692	292.313	73.7851	125.507	73.0467	122.596	81.7133	159.938	625.178	1280.14	73.8614	125.031	74.6979	126.631	75.6128	179.547	96.3695	186.118	370.172	1206.11	73.5826	123.159	77.9814	130.408	73.2095	122.984	73.3863	125.478
	2017-04-05 02:55:00	265.857	1396.73	621.186	1802.79	148.634	185.675	72.1531	126.069	366.893	1416.64	80.6497	139.571	70.9477	128.671	229.01	249.51	71.9561	126.75	1541.34	2532.68	302.768	293.786	71.5106	126.053	70.5592	123.325	65.7767	145.036	616.511	1264.72	75.636	129.2	71.5796	126.998	72.958	174.654	78.763	182.814	364.118	1195.87	71.8556	127.408	71.2603	125.124	71.8465	123.298	72.1575	127.366
	2017-04-05 03:00:00	265.964	1306.13	636.054	1824.08	150.289	185.766	71.2356	123.638	363.066	1397.57	75.4107	132.987	71.6326	127.898	223.014	239.02	71.3789	125.988	1543.89	2545.8	304.654	293.866	71.7621	125.242	72.9703	125.743	72.5588	149.007	616.295	1266.16	67.5364	119.679	75.2545	132.058	73.1926	181.301	77.5736	188.646	362.82	1184.82	71.7611	123.317	71.3233	124.109	81.1617	134.69	72.4027	125.799
	2017-04-05 03:05:00	268.226	1277.34	626.433	1819.81	148.72	183.806	71.7217	126.141	372.589	1406.7	79.4591	137.652	74.1552	130.83	219.546	236.294	72.1262	124.589	1554.12	2574.13	307.855	296.249	72.9085	126.276	71.68	125.189	82.3968	171.539	643.252	1284.5	71.5115	125.065	80.4506	136.317	72.2659	171.392	72.4951	183.876	369.074	1207.21	71.0782	122.329	72.1133	124.29	67.0748	121.576	70.8569	122.86
	2017-04-05 03:10:00	265.421	1386.43	623.915	1824.25	148.605	187.105	73.0599	128.199	363.899	1438.57	77.5596	136.73	71.4733	128.55	220.076	237.909	71.5851	125.37	1543.46	2547.12	316.823	309.275	70.7024	124.736	70.9902	122.403	71.829	160.97	622.609	1278.07	70.4011	122.711	68.1473	122.408	73.7407	169.066	71.4503	140.666	362.904	1191.55	71.7688	124.096	71.6428	123.567	71.4761	124.302	71.5977	127.119
	2017-04-05 03:15:00	265.633	1370.46	640.982	1869.92	146.534	186.968	68.5325	123.468	363.257	1511.5	75.8646	136.889	70.935	130.969	220.544	239.463	74.352	132.079	1537.07	2533.6	308.584	299.282	69.4986	126.139	68.4886	122.853	69.5874	132.461	619.368	1287.63	69.9604	124.603	69.427	124.829	69.326	130.049	71.9887	131.672	366.929	1200.69	70.3184	125.43	68.4791	123.899	69.1658	122.952	73.2509	130.413
	2017-04-05 03:20:00	266.2	1430.07	640.48	1854.12	150.824	185.112	75.2319	126.364	368.061	1499.66	81.4244	136.418	75.1082	130.182	223.396	238.155	78.4258	131.183	1541.7	2511.04	315.879	302.011	75.06	126.791	75.6812	125.715	74.1135	128.662	631.535	1293.39	74.3539	126.159	84.4408	136.769	73.4122	127.006	73.2522	126.601	362.139	1173.99	73.2294	121.745	74.6674	126.358	79.15	131.875	80.3207	136.219
	2017-04-05 03:25:00	290.93	1402.04	660.571	1900.1	149.784	184.544	72.2013	123.377	362.349	1499.13	89.0835	151.159	72.485	128.383	221.951	237.183	72.9524	126.824	1531.88	2493.54	313.693	299.057	76.6845	130.617	71.6376	123.617	73.2003	128.421	628.421	1327.88	71.6803	123.97	61.6244	115.486	81.769	139.997	72.8861	126.374	366.28	1196.43	72.1621	123.476	72.5346	124.151	72.6104	122.869	71.1999	122.094
	2017-04-05 03:30:00	268.522	1433.67	642.4	1851.07	149.257	185.547	71.6783	124.706	367.005	1493.2	78.0546	136.138	72.9337	128.884	222.593	237.22	72.0288	127.579	1541.37	2546.36	317.398	304.483	75.8755	131.388	73.1338	125.765	71.1962	125.6	616.685	1273.03	72.3965	124.927	72.6114	125.741	71.8568	128.153	72.1822	126.152	364.123	1196.23	78.1515	131.085	74.0798	127.053	71.2569	123.658	72.1539	126.728
	2017-04-05 03:35:00	269.105	1411.08	667.445	1936.09	148.214	184.335	80.1807	136.376	363.666	1503.14	78.5428	137.672	70.8082	126.659	221.326	236.857	70.931	124.32	1527.66	2490.93	320.157	305.776	72.012	126.778	69.9696	121.847	71.6996	126.254	617.816	1265.46	76.2086	129.643	71.0787	124.719	71.5547	125.925	71.0689	125.447	368.918	1189.22	74.2807	128.099	68.8294	120.259	71.5062	124.374	72.246	125.328
	2017-04-05 03:40:00	265.702	1374.59	655.234	1912.91	154.458	191.876	72.4061	125.676	56079.9	2828.84	79.5745	137.222	82.3697	144.166	221.122	237.929	72.999	126.036	1522.35	2493.73	320.708	305.84	72.4748	126.641	76.7939	131.348	72.4105	126.132	621.806	1270.97	76.681	132.094	71.9084	127.032	73.0925	127.719	72.5511	124.868	368.443	1206.66	71.9582	124.376	73.4928	126.388	73.0539	126.425	72.1418	126.093
	2017-04-05 03:45:00	265.574	1414.31	666.874	1935.46	150.937	184.702	75.9435	126.154	748.283	1621.56	82.3864	136.578	76.0582	130.504	225.958	237.311	75.7986	127.307	1543.34	2531.24	326.172	308.025	74.559	125.188	79.5955	130.855	75.0283	125.919	625.59	1273.31	74.7923	124.931	75.7614	125.8	74.5012	125.481	73.9433	123.643	371.579	1205.72	75.2151	124.584	79.0341	129.332	75.4334	123.281	74.382	124.324
	2017-04-05 03:50:00	265.702	1452.8	672.526	1965.41	153.986	190.176	71.822	123.566	369.573	1627.33	78.6103	137.367	71.6834	127.267	220.766	236.834	72.6521	124.627	1542.87	2514.26	325.659	309.241	72.9467	124.235	71.8066	123.546	71.4189	124.24	624.759	1287.76	71.662	123.373	72.0706	125.5	71.9547	125.759	72.7933	126.116	363.571	1190.73	72.5091	124.1	75.5408	130.186	71.8416	122.296	73.6268	126.909
	2017-04-05 03:55:00	267.984	1415.81	687.106	1996.7	147.113	184.134	71.186	124.616	354.375	1624.75	77.7616	136.162	71.7985	130.497	228.436	248.991	70.0592	125.141	1548.09	2558.03	327.105	310.356	71.2099	126.641	71.332	124.74	69.9461	125.71	623.175	1286.73	70.9359	124.149	69.7254	124.285	70.7992	124.938	76.0118	131.637	363.335	1187.68	70.1658	122.317	72.53	125.585	70.4099	123.322	70.2497	124.03
	2017-04-05 04:00:00	268.498	1340.19	694.097	2003.49	151.967	185.219	73.064	123.519	369.948	1603.58	80.6573	135.272	94.2301	137.077	222.811	237.484	73.6369	126.533	1535.28	2505.11	329.419	311.175	72.6075	124.851	72.6488	123.369	74.3009	127.605	623.995	1273.28	73.4262	122.772	77.8222	132.596	72.537	125.546	77.1942	131.186	366.998	1194.36	72.526	122.706	72.4276	121.541	79.807	130.807	72.8132	125.306
	2017-04-05 04:05:00	265.373	1287.62	694.04	2005.27	150.318	185.306	72.5341	124.921	373.835	1553.12	78.9113	136.597	72.6602	128.656	222.179	238.086	73.4244	126.236	157114	232222	332.814	314.239	73.2121	125.412	72.5614	124.606	82.2784	139.884	618.998	1256.58	71.7507	125.013	76.9308	132.245	72.4683	126.927	73.4832	128.574	362.509	1184.72	73.5972	124.475	71.896	124.115	70.8979	123.371	72.6641	125.163
	2017-04-05 04:10:00	265.295	1266.63	693.309	2013.15	149.439	185.77	71.8816	124.461	371.005	1582.26	78.4659	135.917	73.1765	129.314	223.194	239.789	71.0488	123.726	3120.95	2029.58	345.528	330.391	71.8909	123.801	72.7136	124.078	70.2856	124.924	626.443	1284.62	71.318	123.498	71.9964	125.39	76.1911	130.193	71.8329	123.664	366.955	1198.38	72.3809	124.076	72.9679	125.996	71.3587	123.008	72.6163	125.629
	2017-04-05 04:15:00	266.032	1267.62	682.879	1997.9	148.665	184.561	71.6819	125.582	366.649	1568.55	78.7819	136.174	71.8693	128.751	220.2	236.738	75.2374	131.825	1423.07	1994.44	335.173	316.951	71.1567	125.333	70.5139	123.59	71.2704	125.358	620.178	1260.94	71.5172	124.157	71.9199	127.25	67.7285	122.228	70.2142	123.06	368.243	1197.59	70.2215	121.903	71.2167	124.762	73.5432	127.274	70.6598	124.873
	2017-04-05 04:20:00	267.983	1252.17	705.062	2051.48	157.09	189.348	74.4454	124.887	370.481	1574.61	80.9878	136.032	74.8564	130.308	223.572	236.911	80.3092	132.963	1407.93	2003.08	340.175	318.734	74.9652	126.368	74.8478	123.794	74.4703	127.666	632.743	1282.21	73.6841	123.187	73.6894	125.31	75.0396	126.396	74.1931	124.566	368.339	1204.23	74.5397	124.364	73.9269	124.773	77.651	127.747	83.0429	138.404
	2017-04-05 04:25:00	265.505	1307.32	721.502	2086.09	143.666	178.003	72.82	124.167	372.146	1565.5	89.0096	148.659	73.7218	129.347	222.646	236.96	72.2849	126.367	1414.52	2031.82	341.755	319.849	77.6237	130.696	72.5172	123.71	72.5696	124	624.194	1264.53	72.5589	123.607	74.2297	126.04	81.5172	136.859	74.1383	127.333	365.072	1195.65	74.1446	124.269	83.6526	135.934	72.9836	123.414	73.6068	125.391
	2017-04-05 04:30:00	266.9	1391.36	708.224	2049.71	150.124	185.357	72.2324	124.576	367.638	1496.75	78.8988	137.692	72.1623	128.617	220.884	236.716	70.6952	125.772	1530.69	2487.82	339.866	320.051	76.1415	131.882	72.0377	124.369	71.777	125.476	634.414	1309.93	71.1916	123.765	70.5875	123.414	76.0223	132.047	70.7829	123.635	366.141	1192.42	75.3986	129.734	61.7867	114.182	72.6313	126.415	71.5667	124.542
	2017-04-05 04:35:00	266.036	1401.91	716.048	2090.12	149.869	182.804	82.2653	135.609	367.493	1472.1	80.1472	138.284	74.2132	129.632	221.269	235.011	74.871	125.39	1523.58	2494.88	347	323.36	73.5994	127.128	81.8308	132.984	73.6874	125.49	15806.4	2626.21	78.7509	130.252	80.0265	132.652	67.6062	120.43	73.0182	125.503	375.344	1217.61	76.3968	129.171	72.0923	124.355	72.9676	124.48	72.7249	123.919
	2017-04-05 04:40:00	265.571	1412.91	715.09	2076.64	152.923	191.267	70.0577	124.975	368.314	1450.52	77.2661	135.542	80.2397	141.438	220.072	238.288	71.3007	126.034	1529.81	2498.12	344.942	324.238	70.9069	125.153	66.4599	120.049	70.5181	124.947	240368	6536.38	75.1369	130.051	67.9783	122.108	71.7554	127.748	71.4175	126.22	361.766	1190.53	72.6767	126.426	70.8967	123.445	70.1282	122.126	80.4134	134.753
	2017-04-05 04:45:00	266.204	1383.14	737.073	2124.68	151.109	183.852	75.8535	124.471	369.717	1429.88	82.5444	134.967	74.5253	129.206	224.424	237.512	74.1996	123.855	1533.98	2498.16	352.055	325.025	74.9786	124.071	79.3746	128.873	75.4035	125.108	3002.41	2134	74.225	124.37	71.5232	121.394	74.8194	124.384	75.3444	124.909	360.447	1171.83	74.5754	121.626	79.4218	130.716	74.9377	122.67	66.0031	115.893
	2017-04-05 04:50:00	269.206	1401.25	736.176	2138.4	155.57	190.82	73.3063	124.044	367.84	1447.73	80.4924	136.115	74.8415	129.001	222.386	236.947	74.616	126.421	1546.55	2512.81	351.054	326.543	74.4312	125.329	73.0947	124.454	73.1989	125.784	573.377	1089.33	74.4107	125.043	73.198	124.337	73.0019	125.627	72.7142	124.776	376.864	1206.46	80.0133	130.271	78.0064	131.482	75.2691	125.092	73.4379	123.448
	2017-04-05 04:55:00	266.186	1381.82	749.124	2188.11	147.375	183.271	71.8016	124.311	364.979	1437.7	77.6407	135.872	72.1609	131.146	229.198	250.008	71.2672	125.344	1531.38	2477.24	351.03	327.341	70.7718	124.216	71.7761	123.032	73.4825	127.194	570.663	1110	70.3812	122.902	72.036	125.903	72.5688	126.596	76.6002	133.345	347.885	1165.18	65.0417	116.007	72.1783	125.095	70.7631	123.324	70.8187	123.743
	2017-04-05 05:00:00	383.984	1418.33	744.243	2138.5	149.697	185.18	73.6017	125.29	364.596	1418.01	79.7722	137.042	72.438	128.865	222.973	239.048	72.9559	126.033	1532.17	2499.45	355.059	329.657	73.2016	127.315	254959	536024	76.1112	135.722	571.258	1122.15	72.3395	123.386	76.6484	134.151	72.3287	125.566	78.2859	132.52	361.815	1185.55	72.6337	125.22	72.0276	124.108	77.2051	129.758	72.9856	125.342
	2017-04-05 05:05:00	266.41	1398.99	737.233	2174.3	150.548	184.637	72.0426	124.099	376.07	1426.34	79.2966	136.116	73.2834	129.547	222.475	238.448	72.6697	125.222	1532.83	2504.62	357.601	331.178	73.7151	125.974	2649.06	4295.89	75.5218	131.65	572.076	1110.13	73.2481	124.886	76.5363	131.91	71.6776	124.619	72.02	125.141	364.99	1182.22	71.8817	122.764	72.125	125.064	72.9257	125.402	73.0593	126.419
	2017-04-05 05:10:00	268.937	1396.4	744.292	2184.44	147.686	183.322	72.1983	125.202	357.883	1414.42	78.2536	135.825	72.6003	129.629	221.576	237.186	72.3301	125.504	1528.5	2498.67	366.774	345.053	71.4034	124.818	74.0311	160.836	72.1126	127.4	595.78	1199.79	71.6616	124.584	73.2332	127.726	72.5404	127.782	70.7949	123.731	364.345	1191.16	70.9358	122.123	72.7626	124.241	71.6009	123.727	71.1952	123.596
	2017-04-05 05:15:00	267.357	1380.24	762.474	2225.43	148.357	187.118	71.6852	125.352	361.462	1422.3	77.6507	136.048	70.655	129.496	221.665	238.826	79.5392	135.677	1540.89	2522.19	360.887	336.059	70.3966	124.543	72.0335	173.659	70.3839	124.648	625.839	1303.18	69.5548	123.061	70.562	126.341	70.6524	126.307	70.9247	125.44	372.089	1211.27	72.4358	128.507	70.5593	124.556	70.2099	123.156	70.0455	125.979
	2017-04-05 05:20:00	408.127	1393.74	766.909	2235.31	150.836	184.613	72.8614	123.908	367.063	1435.45	80.5519	136.565	73.9116	128.851	224.235	237.478	74.3806	127.174	1535.85	2514.37	363.467	337.326	73.8319	125.53	74.3288	177.264	72.4507	125.351	624.325	1269.88	78.0317	129.937	72.9802	124.291	73.3696	125.333	73.9197	126.153	359.042	1174.27	72.2749	121.21	72.7014	124.106	78.5712	130.358	83.5246	140.79
	2017-04-05 05:25:00	466.9	1396.44	790.62	2287.02	153.254	184.335	75.5166	123.577	369.143	1460.62	92.0943	148.67	76.9826	131.204	226.158	239.2	74.1454	125.298	1545.5	2513.85	367.542	336.429	80.7208	132.952	78.2781	180.023	76.3246	125.462	634.821	1297	71.2367	119.098	76.5292	126.217	84.8224	136.979	75.6075	125.743	368.513	1193.24	75.1348	121.821	76.3815	123.431	76.1862	124.337	75.3262	124.304
	2017-04-05 05:30:00	267.141	1409.69	776.202	2264.83	147.158	182.786	71.4744	124.742	367.332	1515.14	77.9888	136.089	71.0864	128.753	219.862	236.465	71.5446	126.046	1517.86	2492.03	364.775	339.463	74.2461	128.928	70.1493	128.507	71.7746	127.112	624.74	1288.6	70.2849	123.459	70.5547	125.954	69.7327	126.908	70.3448	124.454	362.966	1181.61	76.2495	130.245	76.652	128.736	69.6435	120.923	70.0602	124.826
	2017-04-05 05:35:00	264.572	1398.52	780.855	2283.14	150.076	184.983	81.5577	137.623	367.115	1505	77.2973	138.897	72.0332	128.041	220.811	237.085	77.1384	131.254	1549.33	2528.71	368.957	341.077	71.8436	128.048	70.3756	124.563	71.3722	124.396	622.611	1273.52	76.3709	130.479	72.2822	126.568	71.7763	125.494	73.0689	127.022	369.951	1196.42	75.6692	130.169	65.6307	118.718	71.8343	124.839	72.9561	125.869
	2017-04-05 05:40:00	264.842	1359.07	788.843	2301.88	152.252	189.516	75.9642	129.926	365.458	1513.36	79.525	136.268	81.4633	141.559	222.637	238.699	66.3164	118.423	1513.89	2444.74	371.165	342.077	71.8992	126.337	76.8358	132.418	71.754	124.193	626.324	1296.4	76.4665	130.047	71.3332	123.814	71.7212	126.661	71.5412	126.59	368.751	1196.26	71.6269	123.011	71.2817	122.979	72.07	122.776	72.1348	125.028
	2017-04-05 05:45:00	265.225	1411.33	780.712	2270.51	152.551	186.699	70.2301	119.441	367.415	1469.96	81.6602	135.49	254971	5672.47	223.517	236.544	76.0665	126.943	1549.74	2525.44	373.196	341.725	75.584	125.214	80.9494	135.686	75.0856	126.169	620.09	1258.88	73.5674	124.92	74.4297	124.603	74.9268	126.583	73.744	123.487	358.431	1175.3	74.5751	124.077	80.7907	131.576	75.1766	124.665	73.7465	124.932
	2017-04-05 05:50:00	271.127	1363.57	807.519	2369.05	153.572	189.606	72.4838	124.624	364.438	1397.87	78.9373	137.442	2640.79	255.152	223.894	239.252	72.4595	127.623	1540.56	2542.68	376.781	347.619	71.4741	123.917	70.6481	122.734	73.0353	125.769	622.541	1276.5	72.5714	124.672	12488.5	825.934	72.6941	125.967	73.3648	126.645	361.281	1185.63	75.0449	127.596	75.5418	129.956	71.1993	123.522	72.2846	125.094
	2017-04-05 05:55:00	264.355	1338.82	794.907	2337.32	147.886	183.992	70.408	124.126	365.645	1417.01	77.6959	135.399	73.0709	185.057	229.115	249.526	70.2141	124.387	1538.83	2512.9	375.276	345.806	70.5602	124.894	69.9985	122.857	69.9248	123.856	622.223	1284.93	70.3564	124.272	210457	5253.25	70.4564	126.832	75.6894	131.231	360.923	1178.96	67.8646	119.876	70.4707	124.341	71.6706	122.976	81.7687	137.316
	2017-04-05 06:00:00	264.693	1335.06	807.487	2350.05	149.741	184.636	72.2083	123.81	362.475	1397.3	80.4338	137.01	75.3316	215.153	222.672	237.35	73.335	125.997	1545.87	2548.11	378.936	347.463	73.6778	125.913	73.8084	124.383	72.7284	125.606	623.069	1274.78	72.3395	123.786	75.9995	131.487	72.1036	124.625	76.6968	130.805	365.279	1196.75	72.1917	123.025	73.9594	127.308	78.1634	129.883	62.0011	112.92
	2017-04-05 06:05:00	267.538	1384.32	808.032	2366.89	150.621	185.21	94.0232	132.67	372.4	1426.91	79.1025	136.427	75.8169	201.921	222.409	238.804	73.1951	126.568	1545.29	2530.83	382.306	350.087	72.2466	123.756	72.4063	123.568	83.5279	139.897	621.159	1270.82	72.3667	124.069	88.2717	142.423	73.7328	127.114	72.6817	125.952	384.204	1194.81	73.1451	125.053	72.5516	124.476	71.6916	124.998	72.9684	125.152
	2017-04-05 06:10:00	265.21	1394.93	830.804	2406.49	151.905	186.081	73.3312	124.517	363.878	1491.38	80.6694	136.827	73.9393	138.502	220.103	234.048	73.7807	126.415	1539.94	2515.39	393.045	364.171	73.2504	127.191	73.1139	123.219	73.1192	126.983	620.712	1274.62	74.0506	124.356	62.6781	114.904	73.4106	126.509	74.6741	126.534	366.795	1194.7	73.2583	124.975	72.8151	122.401	73.291	123.097	73.5533	125.485
	2017-04-05 06:15:00	264.673	1451.02	811.182	2396.94	146.854	184.703	70.018	123.919	358.956	1493.64	76.8232	136.939	69.9932	130.915	225.235	243.022	75.2585	131.33	1531.47	2497.22	381.598	351.801	71.5588	124.611	70.9061	125.522	69.2338	124.781	622.956	1280.79	70.4753	125.334	69.7267	124.929	69.4488	124.102	69.4662	125.047	369.389	1203.36	69.8839	122.764	70.9123	124.746	71.019	123.145	70.4448	124.057
	2017-04-05 06:20:00	267.499	1403.13	817.602	2393.94	151.919	185.846	76.1049	125.867	370.273	1507.84	82.3585	136.86	76.4694	132.906	219.769	233.253	79.8207	133.307	1534.97	2479.34	396.249	361.024	74.878	125.988	75.3048	125.892	76.4092	127.434	630.794	1281.86	74.9522	126.093	75.9243	126.826	75.9491	128.642	78.7511	129.733	368.491	1201.66	75.117	125.27	75.1018	126.288	79.6923	133.183	83.6623	140.081
	2017-04-05 06:25:00	264.597	1395.12	843.258	2445.66	152.03	186.139	72.936	124.857	371.655	1526.5	114.783	160.723	73.8348	130.221	223.338	238.898	72.6184	127.702	1534.47	2487.42	384.511	351.088	77.8207	132.369	72.5715	123.501	72.1426	123.673	628.656	1286.79	72.6684	123.709	72.7868	125.857	82.0556	137.866	69.4314	120.822	369.996	1208.32	74.1089	125.535	72.9836	124.091	72.7239	124.012	72.6348	125.978
	2017-04-05 06:30:00	267.067	1457.36	835.952	2445.55	148.232	183.133	70.854	123.454	367.806	1528.16	73.5143	131.562	71.6161	128.414	220.452	237.234	71.8386	126.11	1539.56	2535.93	390.254	356.59	76.3881	132.671	71.6371	124.169	70.455	124.651	620.724	1264.82	70.2062	122.292	91.74	133.289	71.6616	127.933	71.9903	127.191	363.615	1178.96	75.2534	129.895	71.9012	125.063	71.9379	123.362	73.5479	127.32
	2017-04-05 06:35:00	262.454	1395.02	826.312	2413.56	150.789	183.723	82.7463	135.571	366.707	1501.64	80.4886	137.096	75.6978	130.948	224.17	237.88	94.4152	132.179	1534.02	2477.69	396.504	358.943	74.1491	125.908	74.8197	124.151	95.4117	133.872	626.304	1280.8	79.2375	130.094	74.7399	124.372	73.0921	123.462	74.0263	124.104	375.766	1198.67	78.7109	129.894	74.2336	123.185	75.1192	124.461	73.4159	123.328
	2017-04-05 06:40:00	267.661	1389.31	256563	8143.25	155.635	192.004	74.582	129.07	365.338	1485.46	80.3932	137.602	82.6645	141.303	221.449	235.565	73.0026	125.714	1538.06	2530.03	396.183	361.253	72.2581	124.472	76.9885	129.925	74.2109	127.03	621.37	1265.4	78.5098	131.956	73.1938	126.655	74.1586	127.785	72.7945	125.767	364.101	1184.91	72.4431	124.183	72.9984	125.286	72.6801	123.472	72.5136	125.608
	2017-04-05 06:45:00	426.462	1340.42	2577.52	2539.76	155.176	187.087	76.6466	124.872	373.28	1415.94	83.0597	134.924	77.0373	130.262	227.285	238.977	78.168	126.8	1550.88	2555.43	401.863	360.931	78.1337	126.321	81.6375	129.332	75.8351	125.253	636.479	1305.26	75.5154	124.975	77.2903	125.379	76.5137	125.595	77.4737	128.484	370.437	1191.16	77.5135	125.72	81.9506	130.562	77.4732	124.776	77.8442	126.627
	2017-04-05 06:50:00	264.791	1446.06	853.386	2501.32	154.412	191.702	72.1458	124.134	362.028	1433.45	78.9515	136.343	72.3402	128.665	222.113	237.403	71.8908	125.408	1539.71	2524.96	421.808	372.387	99.099	138.874	71.3506	124.444	72.6566	125.112	623.972	1281.41	72.3619	123.867	72.5366	126.788	72.0364	126.312	72.3491	125.105	368.986	1195.09	72.6968	124.003	76.6726	131.44	72.0732	122.486	253209	5584.39
	2017-04-05 06:55:00	267.383	1390.01	836.327	2496.82	153.87	189.184	73.2682	125.724	364.854	1433.03	80.2378	138.125	73.4879	131.066	230.719	249.993	218333	5248.19	1553.42	2564.5	402.419	364.93	65.3834	118.296	71.7816	122.619	72.4292	126.07	617.176	1258.7	72.5173	125.491	71.7364	125.837	71.5324	125.935	75.8715	130.324	358.019	1179.91	71.1514	123.075	71.3749	122.013	71.6916	123.895	4378.83	284.883
	2017-04-05 07:00:00	264.831	1406.59	866.652	2544.96	144.966	178.432	73.1282	124.532	363.774	1424.58	79.995	137.057	73.5778	127.379	223.481	237.89	3384.63	124.47	1533.85	2484.38	404.814	366.662	73.9302	125.914	72.8947	122.816	73.1013	124.658	624.585	1282.68	73.2567	123.586	76.6008	131.803	74.3222	127.542	79.9057	132.799	368.205	1197.14	74.2143	124.345	72.7027	124.108	84.5618	134.622	74.2459	174.195
	2017-04-05 07:05:00	265.243	1389.82	866.976	2558.39	151.668	187.161	72.5327	124.236	374.064	1451.61	78.9373	134.75	73.0006	128.072	222377	338730	73.2793	125.899	1521.02	2462.72	404.91	365.698	72.7964	125.48	72.7195	121.505	82.5821	137.922	623.924	1283.69	72.0827	122.409	78.1265	130.953	72.156	126.267	71.89	125.354	365.599	1190.85	73.6701	125.783	77.1844	131.413	66.1819	117.936	75.7749	177.474
	2017-04-05 07:10:00	267.27	1438.6	880.92	2583.7	148.495	182.326	79.7207	131.652	361.466	1429.32	81.3866	138.673	73.4092	130.822	2228.55	4371.1	71.9401	123.405	1533.5	2502.88	419.574	383.102	73.2182	127.188	73.7066	125.752	72.1358	125.783	624.749	1276.78	73.8887	124.248	72.28	126.079	73.3373	126.422	72.1542	124.61	366.497	1192.62	71.9687	124.22	69.2753	120.589	73.7661	124.897	73.8918	173.566
	2017-04-05 07:15:00	262.822	1389.91	866.691	2560.46	148.361	184.081	65.6495	119.886	363.745	1435.95	76.8281	135.361	72.1065	129.134	220.345	237.265	81.1997	138.098	1538.47	2529.71	407.335	370.39	70.8677	124.874	70.3719	125.08	71.3356	126.071	627.036	1298.05	70.5718	124.115	71.1042	125.557	71.1199	125.825	71.5891	124.477	365.969	1190.46	70.5502	122.836	70.6609	122.898	76.4698	130.491	71.8087	180.042
	2017-04-05 07:20:00	267.76	1427.79	894.746	2624.68	153.956	184.544	75.4133	122.948	371.461	1505.11	83.6046	134.498	76.3833	128.239	226.729	237.966	76.0397	125	1543.06	2514.66	417.718	374.28	76.5912	125.536	76.4637	123.656	76.7731	125.083	633.105	1296.4	75.6836	123.002	76.9048	124.325	76.1221	125.77	76.4705	124.483	368.733	1195.29	78.0197	126.111	76.4097	124.258	75.5431	122.599	88.0426	194.798
	2017-04-05 07:25:00	264.498	1407.26	905.545	2635.08	150.109	184.706	73.7346	124.102	367.841	1473.01	90.1387	150.696	73.5458	127.94	224.605	238.666	72.3402	125.302	1524.44	2480.58	416.781	374.347	78.5312	132.298	73.978	127.616	73.1927	125.399	628.888	1286.3	74.5726	125.848	72.8988	125.237	83.3337	138.36	73.4407	125.932	370.743	1201.63	72.9317	122.378	73.6517	123.756	73.3404	124.722	75.6457	183.405
	2017-04-05 07:30:00	264.59	1389.15	900.547	2639.78	150.703	185.051	73.2382	125.288	367.793	1505.43	79.903	136.809	74.0348	130.57	222.092	236.35	73.3626	126.151	1531.78	2497.82	416.285	375.297	77.2293	130.747	72.3943	124.684	73.9557	127.127	626.82	1287.79	71.9091	123.019	72.7743	126.506	71.8827	126.276	72.2414	123.839	365.332	1181.81	76.1637	129.885	72.3545	123.321	73.4312	123.868	72.7127	131.549
	2017-04-05 07:35:00	267.46	1427.57	905.498	2661.84	150.455	185.073	81.6097	136.031	365.555	1507.8	79.9851	137.344	73.0962	128.452	221.816	237.125	73.1225	125.19	1534.34	2509.75	417.141	374.5	71.8985	125.155	73.2942	122.834	72.434	124.144	627.129	1287.97	77.525	131.552	92.9467	130.953	72.9535	124.346	73.8852	126.144	372.327	1202.25	78.3768	130.984	73.7428	124.27	73.0301	122.599	72.377	125.993
	2017-04-05 07:40:00	268.059	1403.41	887.621	2632.05	155.175	193.305	229872	5253.89	362.274	1437.03	81.8149	138.505	82.5841	142.066	220.936	235.959	72.5326	125.985	1547.43	2556.95	420.686	379.315	254128	5516.35	76.7205	131.012	72.2226	125.386	622.508	1273.6	77.069	130.631	73.278	125.405	72.9143	126.696	72.1499	126.242	362.404	1178.28	72.9628	123.228	71.6766	121.444	252366	366074	72.867	130.068
	2017-04-05 07:45:00	264.159	1374.65	899.367	2651.39	152.624	184.976	3535.49	223.894	370.484	1430.61	79.9787	132.689	76.113	131.709	225.316	237.128	76.2821	125.908	1540.54	2504.05	433.455	389.753	3511.76	269.383	81.0093	130.472	76.1601	124.653	628.644	1288.53	74.9587	124.511	75.182	125.199	74.9849	125.032	75.8501	124.86	373.102	1202.68	85.2556	134.09	81.3012	131.749	2227.84	4293.53	76.5804	127.959
	2017-04-05 07:50:00	264.814	1361.67	914.499	2687.36	155.289	192.9	73.598	124.896	371.125	1454.34	80.5029	136.645	73.5189	129.498	222.443	237.49	73.0596	125.735	1543.83	2517.34	419.37	374.707	74.1743	167.964	72.7787	125.602	72.8652	124.887	614.618	1243.93	72.6507	123.427	74.5728	126.838	73.3921	125.474	72.3217	124.3	368.967	1206.33	62.2115	113.172	77.0487	129.777	74.3478	168.235	72.4474	125.75
	2017-04-05 07:55:00	264.43	1408.18	928.017	2727.85	150.102	186.026	73.085	124.959	367.835	1423.67	78.8644	135.399	73.24	130.276	232.533	252.458	73.5217	126.202	1545.57	2519.79	427.107	383.39	73.6777	174.728	73.441	124.977	72.2749	126.569	628.294	1306.12	73.1133	124.347	72.5538	125.646	73.1233	126.444	77.7985	132.243	363.226	1191.69	74.8493	126.3	92.9558	130.248	73.7816	168.872	72.9107	126.172
	2017-04-05 08:00:00	268.671	1381.74	927.696	2732.53	151.987	184.649	73.0272	123.548	368.302	1429.82	79.7217	134.97	72.9983	127.194	222.982	237.305	72.5829	123.877	1530.78	2495.61	430.572	384.932	85.9063	185.289	71.7645	122.628	73.5025	126.364	636.606	1297.15	73.0245	123.71	76.5568	130.109	72.2378	125.019	78.8309	132.939	370.341	1200.23	72.4605	122.487	73.3044	123.65	79.9877	175.195	74.0016	125.833
	2017-04-05 08:05:00	405.414	1391.37	931.1	2731.62	150.063	184.766	73.1158	125.249	374.88	1443.61	81.3602	140.111	74.1187	130.345	221.768	238.876	92.9805	132.156	1540.35	2533.05	431.211	386.075	64.0099	165.038	74.118	125.774	82.7255	138.223	608.185	1248.39	72.7044	124.791	78.7234	133.867	72.9871	127.065	70.8456	123.045	360.223	1167.27	71.9645	122.997	75.8967	126.216	74.7151	171.961	72.1939	125.088
	2017-04-05 08:10:00	264.934	1425.09	937.805	2755.18	15448.1	45631.1	74.4763	123.887	368.295	1430.62	81.4276	135.628	75.78	129.611	224.496	237.494	76.3006	126.564	1527.87	2502.14	444.318	399.062	76.1708	179.933	82.2966	131.243	73.3122	124.945	623.301	1270.3	75.2883	126.773	74.1454	124.372	75.4388	125.389	75.0563	125.178	367.713	1194.25	75.8572	124.246	72.6723	122.782	75.5096	178.421	74.672	125.622
	2017-04-05 08:15:00	267.925	1442.16	930.821	2755.48	240657	457038	70.979	124.216	358.062	1396.24	76.9272	136.397	70.652	127.439	215.438	233.593	74.6462	129.88	1417.87	2339.14	431.723	387.474	72.3719	180.448	62.1241	115.602	71.4435	124.638	571.73	1099.18	69.4744	122.071	71.7594	125.587	70.2158	125.009	71.7768	126.521	371.308	1205.63	70.8133	124.103	69.9979	122.626	72.3384	168.537	71.6886	128.011
	2017-04-05 08:20:00	265.174	1404.23	957.275	2806.62	1766.51	259.828	76.058	124.749	367.049	1428.42	84.655	139.406	77.1208	129.634	225.504	238.86	80.4564	130.817	1552.5	2561.29	440.671	391.3	77.9836	153.096	77.0019	123.152	75.7548	124.847	629.892	1283.98	76.5477	123.98	75.2534	125.741	75.9152	126.708	75.2534	125.036	372.435	1203.43	75.2369	121.976	76.5936	125.69	83.282	190.115	84.0073	139.023
	2017-04-05 08:25:00	268.148	1365.61	957.894	2788.37	152.375	216.681	74.2226	124.978	364.932	1402.45	89.911	149.066	74.4576	128.838	223.755	237.976	73.6727	127.21	1537.82	2527.41	439.856	391.005	78.2475	134.066	73.5922	126.368	74.3827	126.383	629.713	1288.37	73.585	125.066	74.7528	126.602	84.2897	140.366	73.5728	125.436	366.124	1193.4	74.4513	124.523	74.3372	123.125	74.921	134.181	73.9471	124.573
	2017-04-05 08:30:00	264.644	1348.14	945.106	2803.74	151.81	226.477	74.4244	124.61	365.678	1412.74	80.2652	135.824	73.4565	128.005	223.859	239.775	73.7716	125.114	1538.03	2513.36	444.756	395.168	79.3233	134.308	72.5863	123.101	74.1693	125.463	623.977	1278.23	73.961	124.008	74.9135	126.066	73.1609	127.569	75.1895	127.356	367.738	1198.01	79.3369	133.436	73.2511	125.25	73.2585	125.881	73.6211	126.411
	2017-04-05 08:35:00	268.662	1347.82	969.348	2836.02	153.188	233.442	81.9903	136.394	364.585	1412.33	79.5259	136.49	73.9747	129.435	222.421	237.516	72.3345	123.905	1544.72	2524.26	444.021	394.441	73.0469	127.787	73.5929	123.813	72.4367	123.148	628.347	1295.23	77.3148	131.005	72.4467	123.623	73.0619	124.9	72.5084	123.504	376.545	1204.54	76.4634	129.28	72.9777	124.52	73.7578	125.091	74.4919	125.758
	2017-04-05 08:40:00	264.46	1411.65	959.075	2814.06	156.107	209.777	73.4207	126.25	367.032	1491.35	81.2998	136.677	84.6613	144.169	228.38	242.457	74.894	125.827	1525.59	2485.74	446.191	396.598	72.7259	125.917	79.6508	131.597	74.5116	126.307	624.861	1275.22	82.1618	133.978	73.0119	124.656	73.9515	126.432	73.764	125.375	362.422	1175.89	73.3716	123.195	74.94	126.683	74.1731	126.208	73.6348	125.675
	2017-04-05 08:45:00	269.183	1434.3	961.156	2844.08	152.537	189.032	77.1349	126.147	367.604	1508.92	84.8071	138.173	75.2532	129.129	221.114	232.838	76.1146	126.381	1531.7	2480.96	450.462	396.881	77.0723	126.512	79.8987	128.402	76.2897	125.784	627.681	1282.6	72.7547	121.618	76.3143	125.363	75.9401	126.37	76.9145	125.399	364.153	1179.93	78.0334	126.312	80.2374	131.283	75.3098	124.704	74.7516	124.204
	2017-04-05 08:50:00	299.81	1425.98	961.306	2824.88	155.434	193.443	71.8339	122.932	359.189	1480.3	77.8233	133.807	73.2067	128.264	220.195	235.842	72.3647	123.958	1538.22	2496.99	446.185	396.309	72.088	125.142	71.6236	124.768	71.8799	125.731	628.865	1297.49	70.9428	123.177	72.8225	127.328	72.8094	126.042	72.2405	125.618	366.094	1185.35	72.1216	123.528	75.7574	128.875	73.3579	124.689	74.6644	128.192
	2017-04-05 08:55:00	304.25	1393.68	980.739	2880.3	150.355	187.698	72.1034	124.365	363.974	1460.68	79.74	136.207	73.8396	129.595	231.968	250.309	73.1621	126.469	1532.12	2482.84	255303	589710	73.175	128.328	74.4107	126.307	72.4596	127.161	615.968	1249.36	72.8012	125.476	71.9378	125.015	75.9502	129.368	76.9092	130.695	371.277	1208.76	81.6927	133.09	74.4017	124.933	73.8772	127.545	72.2869	126.058
	2017-04-05 09:00:00	282.82	1400.32	972.381	2869.7	151.239	186.224	74.9909	125.693	366.172	1414.32	79.9258	136.117	73.5964	129.07	223.216	237.502	73.6249	125.528	1536.6	2517.62	3028.28	492.107	73.6695	125.05	73.1361	122.869	79.7668	134.027	629.449	1297.59	73.8008	124.958	78.4107	133.942	69.7521	122.735	78.6222	131.148	363.534	1190.57	64.1304	113.98	73.2459	125.358	77.9445	130.94	72.8143	125.027
	2017-04-05 09:05:00	280.911	1411.76	986.985	2894.27	147.979	183.717	71.6507	124.723	375.852	1444.79	79.1842	135.338	72.93	129.598	221.177	238.232	72.079	125.197	1546.42	2477.84	457.264	426.522	71.6441	124.974	71.3802	122.047	76.3505	132.288	616.58	1261.82	71.731	124.167	76.8868	130.795	78.2656	132.048	72.1206	126.807	361.476	1178.98	80.0157	132.628	71.6435	123.243	72.4185	125.084	72.5966	125.528
	2017-04-05 09:10:00	280.615	1364.06	1002.7	2937.6	151.758	185.786	73.3723	123.829	366.328	1439.52	80.8096	136.096	74.3369	130.913	224.463	240.279	74.2083	125.51	1537.29	2523.93	469.216	443.626	75.1358	128.433	74.3824	125.76	73.5144	125.909	625.093	1278.02	73.9726	124.409	73.235	125.339	68.2404	120.858	73.898	125.586	378.33	1213.48	66.6282	117.177	75.0256	125.94	73.1321	123.814	74.4502	125.548
	2017-04-05 09:15:00	286.712	1381.57	990.414	2914.85	149.979	185.913	72.8917	125.318	365.757	1444.57	79.5618	137.143	72.6691	129.686	223.028	238.254	76.7545	132.457	1533.11	2491	461.502	442.087	72.3253	126.145	72.7493	124.126	102.856	143.235	625.404	1280.49	72.8819	126.48	72.4328	126.496	71.1746	124.853	71.3635	123.525	362.172	1180.83	71.8279	122.433	72.2349	124.964	73.2291	125.025	71.7818	125.926
	2017-04-05 09:20:00	279.725	1408.94	1007.31	2965.43	151.443	184.913	74.4509	125.908	371.131	1457.3	81.0235	137.627	75.0558	130.099	223.403	237.243	78.5488	132.078	1535.53	2501.69	463.143	444.35	73.5562	124.607	73.6015	123.959	63.2506	114.245	627.656	1276.63	73.5047	124.323	73.9868	125.573	74.747	126.103	74.3618	127.115	369.334	1205.35	74.8634	124.749	73.7469	125.845	78.8548	129.839	82.6308	137.327
	2017-04-05 09:25:00	280.215	1419.05	1030.24	3007.59	152.569	185.979	74.305	124.138	369.918	1506.03	90.8971	149.504	74.0273	128.401	244.645	244.784	74.6364	126.351	1541.42	2508.47	466.08	417.637	80.0232	132.198	84.197	135.172	74.675	124.532	631.137	1294.47	73.6416	123.866	74.2863	126.055	83.7646	137.957	74.4903	125.391	369.411	1192.6	73.7628	124.138	73.8946	123.526	74.0498	124.027	77.2219	130.109
	2017-04-05 09:30:00	280.245	1376.56	1024.04	3011.63	149.632	183.88	72.353	123.896	366.801	1514.16	80.7618	137.266	73.2982	128.689	223.719	238.453	71.7478	123.109	1520.29	2471.35	466.173	412.516	77.9023	132.577	63.4627	113.958	72.546	124.224	626.571	1282.85	73.9624	125.557	73.083	124.965	71.7905	126.126	73.0857	124.14	367.997	1196.58	77.7054	131.277	73.7812	123.932	73.7369	124.123	70.184	122.437
	2017-04-05 09:35:00	283.446	1352.93	1009.37	2992.75	150.403	186.052	84.6357	141.502	368.548	1498.47	79.3027	140.011	74.1273	133.05	221.535	238.273	73.7604	129.096	1528.67	2472.54	469.348	417.43	72.5802	127.439	72.9709	124.67	74.0509	127.946	626.091	1287.19	77.5121	132.987	73.606	128.976	74.4683	128.647	73.1127	127.774	372.576	1194.69	77.2627	132.497	72.9416	125.409	74.4544	126.88	73.8427	126.791
	2017-04-05 09:40:00	403.03	1129.87	1018.75	3017.77	154.678	205.973	72.1078	144.637	362.677	1394.48	79.4277	151.065	82.6473	154.216	222.114	254.127	73.0803	139.66	1492.74	2362.73	468.652	433.098	72.7815	142.571	76.9608	147.917	72.6853	139.58	608.044	1226.56	77.5337	143.309	72.9328	137.89	72.6497	140.18	73.1228	143.414	351.164	1159.56	74.2182	138.354	72.8284	136.617	72.6161	137.776	79.7351	150.911
	2017-04-05 09:45:00	295.56	1159.03	1025.24	3018.2	157.821	193.356	81.9717	135.495	377.224	1404.86	88.3798	150.464	80.8768	137.514	232.189	249.318	81.7343	133.153	1518.52	2408.18	483.658	427.407	82.1441	135.673	86.2905	137.853	81.4001	135.929	625.888	1260.98	82.0056	134.308	82.2264	135.526	82.0514	142.573	82.5465	134.761	364.565	1169.62	80.7206	130.349	86.8319	137.915	81.0848	130.902	75.2979	125.883
	2017-04-05 09:50:00	283.361	1159.03	1029.9	3034.21	156.805	200.447	75.2173	133.088	370.242	1397.05	83.505	153.319	76.7835	137.786	224.093	242.238	74.8626	134.546	1523.35	2459.4	473.973	425.479	75.295	132.776	75.4841	133.08	76.5431	137.895	641.192	1275.49	75.3326	137.572	74.1036	135.764	74.9621	134.437	75.0674	135.124	364.093	1183.04	74.9687	134.876	78.74	141.269	76.1206	134.753	74.917	132.59
	2017-04-05 09:55:00	421.719	1134.94	1028.42	3045.87	149.866	192.306	72.308	132.344	365.114	1396.38	79.0758	153.691	73.3714	136.955	230.138	256.566	73.1861	133.751	1530.68	2503.57	474.625	429.07	72.3085	133.895	72.646	133.821	71.828	136.141	610.962	1244.53	70.9241	129.467	72.9331	130.629	73.0432	135.059	77.4385	139.715	359.621	1179.27	73.3952	130.649	72.7772	136.404	71.9549	130.756	72.4615	135.415
	2017-04-05 10:00:00	268.739	1134.12	1025.72	3043.32	152.907	190.702	74.6515	130.295	366.079	1393.28	82.6579	153.478	74.5332	137.177	225.667	242.088	74.8599	131.425	1522.5	2428.36	480.536	429.571	75.5301	134.543	74.8844	131.523	74.5331	133.43	619.363	1265.92	74.3699	128.907	78.7098	141.305	73.7125	128.607	79.8879	137.733	357.115	1158.85	74.5452	130.47	74.1538	127.846	80.236	139.233	75.3608	132.527
	2017-04-05 10:05:00	266.539	1134.12	1046.09	3097.91	149.049	189.105	73.3216	132.978	371.262	1397.12	78.6993	140.741	73.3326	135.977	223.041	244.518	72.4801	128.964	1506.48	2424.28	478.961	432.045	80.1595	141.35	73.0318	132.482	81.4809	141.392	618.334	1267.04	73.6118	134.488	76.9345	135.9	72.7694	131.973	71.0902	133.516	362.352	1189.96	72.5399	131.925	73.6677	140.373	73.0872	133.779	72.4214	132.18
	2017-04-05 10:10:00	268.563	1165.92	1044.51	3094.59	151.752	191.547	74.2801	131.377	360.979	1372.62	81.818	161.317	75.1844	136.966	222.693	241.666	75.2021	134.329	1513.83	2422.29	494.436	445.788	67.3283	128.688	75.3581	133.444	75.7287	134.313	619.298	1263.83	74.457	138.818	75.2583	135.673	75.7673	135.654	75.187	135.323	355.923	1163.73	74.5369	133.015	75.1042	135.425	74.8927	134.858	74.2794	133.558
	2017-04-05 10:15:00	266.27	1103.98	1050.72	3135.77	150.866	191.729	94.1494	142.233	358.92	1369.81	80.9721	152.208	74.2968	136.828	223.208	248.082	78.0977	140.403	1534.7	2506.89	485.869	436.285	73.7599	133.51	72.7514	135.399	73.1074	132.601	618.36	1265.75	72.6184	137.808	73.9308	135.733	72.0247	135.513	77.1521	136.509	362.421	1181.33	74.5669	136.488	72.793	131.708	73.1568	134.165	93.5639	141.84
	2017-04-05 10:20:00	265.851	1111.25	1058.29	3125.29	151.794	194.087	74.8482	132.692	350.059	1340.54	81.4585	143.889	75.025	137.712	223.709	246.044	78.8893	136.946	1510.47	2423.43	485.715	431.535	74.0246	131.016	74.2437	132.544	73.6982	131.751	621.564	1268.63	74.9253	129.697	74.1562	132.935	74.8187	136.351	71.0005	132.382	368.551	1214.52	73.0947	129.835	74.1948	138.704	78.0756	135.538	84.5307	146.384
	2017-04-05 10:25:00	266.687	1103.27	1051.25	3106.63	155.458	193.263	76.4457	129.903	357.56	1346.82	93.5413	159.977	77.2938	142.152	227.392	243.595	76.1937	131.178	1515.28	2416.62	492.781	439.452	81.5418	139.84	78.1836	133.398	77.8803	133.842	628.469	1283.14	76.8053	135.991	76.4053	131.55	87.0238	148.183	76.8363	132.769	355.178	1161.63	77.2513	131.02	77.9211	137.056	78.6859	136.266	76.2099	133.877
	2017-04-05 10:30:00	268.883	1095.48	964.919	2976.11	144.014	193.998	67.5834	130.686	313.733	1311.06	73.8039	142.709	67.9447	136.184	215.532	246.314	63.9736	129.876	1482.03	2429.63	485.516	434.429	71.3294	141.999	66.5414	131.213	66.5951	133.307	583.896	1241.21	67.6982	143.173	63.8698	135.939	66.3899	136.734	67.7589	130.581	325.231	1149.6	68.7845	135.404	67.184	128.566	67.1	129.544	67.55	129.36
	2017-04-05 10:35:00	266.088	1145.66	1073.19	3175.63	153.843	189.724	85.8089	147.047	347.57	1296.8	82.2902	142.058	75.6702	132.184	227.915	246.955	75.2275	133.476	1502.91	2425.69	496.859	440.545	76.2164	131.183	75.3471	130.719	76.0618	135.516	627.034	1299.71	80.7099	139.095	77.0473	131.258	75.607	132	76.1264	131.926	373.59	1199.39	80.5121	138.443	75.4555	128.119	76.3384	135.055	76.0012	133.958
	2017-04-05 10:40:00	413.639	1141.23	1064.57	3161.05	152.921	199.311	71.1571	133.611	363.952	1390.43	78.4357	148.439	81.578	149.753	220.991	245.243	71.8306	134.69	1501.4	2396.18	490.667	437.371	72.7355	136.434	76.5436	137.381	71.7939	134.195	608.126	1232.16	75.8828	136.132	70.6916	132.022	70.9656	131.133	70.4483	130.114	355.642	1160.75	70.5081	127.749	72.2103	136.461	72.9026	137.321	72.0566	134.867
	2017-04-05 10:45:00	268.943	1141.23	1106.96	3244.26	153.343	194.518	77.7845	134.189	364.16	1367.93	85.1782	148.359	78.2788	138.327	226.549	239.866	77.6392	131.603	1521.55	2471.44	503.387	443.401	76.6665	132.73	82.3662	140.335	77.1252	133.803	628.858	1274.79	77.1539	129.701	77.8849	136.644	77.6936	133.242	77.6181	134.346	358.406	1174.13	77.3631	130.423	81.4425	142.628	76.9947	132.721	77.1059	133.477
	2017-04-05 10:50:00	266.29	1243.15	1056	3170.97	154.89	199.192	73.9286	131.912	368.617	1405.27	79.438	145.931	73.2101	140.199	223.676	243.409	73.3947	129.671	1507.67	2418.05	514.643	449.476	73.2898	132.738	72.4672	135.316	73.5838	135.54	597.405	1222.98	80.7323	140.139	73.8856	136.33	72.5872	134.877	73.9345	135.866	357.11	1178.81	74.1878	127.571	77.6935	137.828	73.1682	132.855	72.3057	127.448
	2017-04-05 10:55:00	266.225	1269.18	1085.83	3216.45	149.503	187.939	71.76	130.077	366.296	1514.1	79.4609	143.415	73.3116	135.113	231.15	252.719	71.4751	125.655	1448.76	2152.77	513.495	454.994	72.5589	132.068	72.077	132.438	71.7764	130.019	617.672	1267.68	65.3386	119.425	71.805	131.147	72.6682	136.302	77.1065	141.102	361.142	1182.98	72.4839	124.032	72.1744	128.43	72.6069	130.98	74.2297	138.055
	2017-04-05 11:00:00	402.846	1390.14	1099.44	3248.32	153.146	185.557	76.2738	126.185	368.511	1507.11	83.2612	140.969	75.8672	132.947	226.769	240.259	76.3913	127.803	1520.04	2472.18	492.122	429.189	85.4925	137.551	75.5317	126.925	75.9562	128.886	629.679	1291.97	73.8913	122.696	78.081	132.167	75.7188	130.002	79.9695	135.166	366.073	1186.64	74.4803	125.4	76.7948	127.923	80.9319	133.772	74.464	130.161
	2017-04-05 11:05:00	268.819	1450.32	1111.3	3283.57	150.305	185.141	73.5447	126.074	373.662	1516.34	79.608	136.066	74.5835	131.138	221.5	237.516	73.5378	126.527	1509.02	2419.11	505.004	440.503	63.8334	117.404	73.9203	126.288	83.1012	141.438	623.187	1274.98	73.714	126.546	79.1829	134.44	73.586	129.436	73.0606	127.383	362.865	1184.37	74.3117	124.74	72.9271	124.19	72.6134	126.635	73.8603	127.922
	2017-04-05 11:10:00	265.722	1422.05	1124.29	3306.42	152.618	185.938	74.8862	126.258	370.323	1525.86	81.5534	139.417	74.8109	129.513	226.034	239.325	75.5198	126.164	1512.24	2449.84	519.521	455.444	75.2755	128.017	74.4805	125.736	74.8985	128.007	621.818	1269.35	74.5224	123.081	74.4048	127.136	75.211	127.516	75.6403	127.794	365.193	1192.53	75.4146	123.993	74.4729	125.917	75.5413	127.752	75.8068	127.874
	2017-04-05 11:15:00	265.736	1415.28	1107.7	3285.86	148.289	185.195	69.8977	123.759	361.56	1513.15	77.1195	135.614	70.4441	129.497	219.784	237.39	73.9956	131.902	1501.59	2406.85	503.841	441.241	90.1598	134.198	71.3145	125.895	69.7941	125.764	620.359	1271.34	70.6788	125.145	70.5364	127.702	69.5715	124.981	69.4792	125.405	365.909	1192.35	69.3301	123.993	71.727	127.363	70.5375	124.671	69.3067	126.717
	2017-04-05 11:20:00	269.288	1394.27	1135	3347.65	153.816	185.918	75.7464	125.033	370.776	1524.01	82.3865	136.695	76.7162	131.147	230.953	243.97	79.8078	131.709	1530.29	2494.7	514.371	446.034	74.9302	126.117	74.7663	124.206	75.1402	125.862	629.917	1288.56	74.2642	123.259	75.1846	127.354	75.0694	127.584	74.3297	126.799	366.635	1196.79	74.5236	122.997	15201.8	577.294	79.5009	131.334	83.3642	139.917
	2017-04-05 11:25:00	268.426	1343.54	1151.23	3388.92	151.3	184.672	73.6256	124.209	387.806	1490.85	89.888	148.649	74.19	129.803	216.194	229.319	74.0554	127.212	1532.64	2491.96	516.919	448.245	78.6041	131.003	93.5264	132.599	73.855	125.284	625.393	1279.09	74.0404	123.273	73.3689	125.863	83.4185	138.97	79.9825	131.335	363.995	1192.83	75.7179	125.183	238529	5444.24	74.3865	123.338	73.7899	125.766
	2017-04-05 11:30:00	266.053	1290.32	1133.43	3353.33	149.615	186.359	71.697	124.877	367.087	1502.64	78.3009	137.339	71.5095	128.497	221.205	238.773	70.7033	125.589	1512.28	2455.45	511.934	446.062	80.2726	136.786	71.8396	123.867	71.1003	125.349	624.837	1287.39	71.103	126.154	71.8376	126.06	70.459	127.975	66.3549	120.598	363.268	1186.56	75.3171	129.225	4109.42	254.452	70.7479	123.934	72.9249	128.977
	2017-04-05 11:35:00	266.317	1346.84	1146.79	3379.55	152.537	186.436	83.6961	138.559	367.211	1483.62	15110.5	50373.6	75.4972	131.949	225.281	237.986	74.4503	124.944	1540.86	2526.38	526.549	454.498	70.3151	122.819	74.929	125.708	74.5334	126.279	619.984	1251.39	79.4312	131.127	75.3578	126.36	74.6529	128.298	74.6271	126.427	379.234	1212.35	77.9777	128.628	76.9057	160.549	76.3483	126.939	74.1104	127.498
	2017-04-05 11:40:00	269.148	1378.06	1151.06	3396.56	155.043	191.383	72.699	125.786	364.287	1443.23	240898	354787	83.0221	142.713	222.392	235.686	74.8115	126.381	1509.04	2480.86	515.904	447.431	73.793	126.612	78.2249	130.48	73.7215	124.296	621.497	1262.38	78.1581	130.884	73.5493	126.192	73.4299	126.704	73.0492	125.379	367.243	1196.68	73.3542	124.2	73.9554	184.507	73.453	124.297	73.3709	126.513
	2017-04-05 11:45:00	266.127	1392.33	1154.89	3403.08	151.428	186.079	74.7396	124.655	366.362	1436.85	1724.39	2250.15	75.3199	129.889	224.772	237.128	74.6286	125.701	1526.81	2484.87	523.827	451.504	74.0683	124.516	78.4102	128.052	74.1045	125.046	622.425	1268.65	73.6339	123.388	74.9996	126.203	73.9031	126.722	75.6275	126.67	368.007	1191.62	76.458	124.643	80.7956	180.62	74.6578	123.374	75.8223	126.114
	2017-04-05 11:50:00	266.264	1414.44	1151.56	3392.26	157.019	191.394	73.8004	123.566	364.692	1426.24	81.7263	176.516	73.458	129.314	224.275	236.879	72.8909	124.255	1543.31	2519.88	523.996	455.975	75.6617	127.435	74.9157	126.109	73.6824	124.386	624.792	1279.64	72.9323	123.289	72.3615	124.629	74.5134	125.279	73.052	126.694	365.503	1190.96	72.4358	123.362	79.5367	181.078	73.4037	123.264	73.0708	125.701
	2017-04-05 11:55:00	266.208	1378.72	1176.68	3446.11	151.146	183.715	74.6638	124.324	369.32	1452.56	83.3634	185.327	75.123	128.736	233.857	250.426	80.3907	131.051	1535.62	2504.47	527.749	455.652	73.654	125.253	73.3868	122.689	75.4362	125.791	624.886	1273.32	75.3699	125.606	75.7546	126.006	73.8776	125.309	78.7167	131.876	365.381	1183.78	73.94	122.789	75.6783	164.036	75.6264	123.92	73.9413	123.328
	2017-04-05 12:00:00	266.226	1438.92	1122.57	3349.33	152.736	186.061	76.0462	126.32	369.961	1434.38	83.1992	178.524	95.1545	135.36	224.984	238.406	69.0289	118.87	1537.19	2542.62	532.083	461.335	74.8992	126.699	75.3247	125.695	74.914	128.369	625.051	1277.12	74.5187	124.068	78.3721	133.7	74.9384	127.209	80.0986	133.792	370.27	1202.41	76.6544	125.442	77.1211	183.072	78.8955	130.252	74.4957	125.639
	2017-04-05 12:05:00	269.111	1350.26	1168.7	3449.35	150.207	186.249	71.5242	124.977	371.42	1420.45	81.3117	193.296	73.1939	132.047	221.735	238.871	72.1308	125.083	1535.37	2513.52	528.683	457.81	73.381	126.905	71.8526	125.215	82.0468	140.756	624.346	1284.65	71.9907	123.356	76.3763	132.355	72.5409	125.24	72.1706	128.225	363.152	1185.09	71.6424	122.314	72.5938	133.788	71.5216	124.362	72.8897	127.353
	2017-04-05 12:10:00	4013.84	2241.27	909.723	2508.34	154.547	188.402	196.803	127.072	748.941	2412.13	745.188	1553.2	642.253	1514.03	286.769	192.699	1487.14	4197.32	1373.94	3007.11	421.109	296.462	199.429	137.925	207.272	421.943	205.454	196.696	1109.48	1857.78	597.58	1607.39	200.99	179.55	1794.13	7609.24	200.474	164.302	3205.23	7125.42	205.911	141.185	1570.14	2972.83	209.014	182.321	769.091	1744.95
	Promedio	997.69	2794.22	1803.54	2298.59	1298.23	2482.98	1134.93	345.508	1398.01	3514.6	1289.3	2439.03	1226.67	307.836	1311.59	2373.76	1117.25	357.165	2214.9	3483.31	1432.94	2921.45	1254.73	469.625	1198.75	2512.52	1256	296.385	2208.21	3786.93	407.177	1965.61	1067.03	160.828	1241.89	2621.55	1186.31	156.025	639.691	1930.97	211.322	339.579	1256.17	295.418	1314.42	2539.73	1202.65	188.396
[truncated: 2 more columns]

## Sheet: Algorithm and Architecture
		Peers	Lookup messages (Algorithm)				Total messages exchange ( Architecture)				Lookup Latency (Algorithm)				Processing Latency (100% load) --Architecture				Processing Latency (50% load) --Architecture				End-to-end Delay (100% Load) --Architecture				End-to-end Delay (50% Load) --Architecture
		Peers	Full_F	Limited_F	Proposed_LRA	Embedded QR	Full_F*	Limited_F*	Simple QR	Embedded QR	Full_F	Limited_F	Proposed_LRA	Embedded QR	Full_F	Limited_F	Simple QR	Embedded QR	Full_F	Limited_F	Simple QR	Embedded QR	Full_F*	Limited_F*	Simpe QR	Embedded QR	Full_F*	Limited_F*	Simple QR	Embedded QR
		3	28	10	3		28	10	7	5	62.455	31.874	11.258		159.769	159.457	139.22		108.623	101.389	88.315		222.224	191.331	150.478	143.76	171.078	133.263	99.573	94.997
		4	35	16	4		35	16	10	7	83.64	61.482	55.316		169.48	164.972	159.177		111.368	108.787	106.221		253.12	226.454	214.493	182.736	195.008	170.269	161.537	137.548
		5	47	21	6		47	21	12	9	122.775	68.104	61.787		170.955	166.497	169.824		114.847	112.882	108.915		293.73	234.601	231.611	188.384	237.622	180.986	170.702	142.15
		6	63	27	6		63	27	14	10	133.512	78.42	67.568		198.048	193.295	184.272		125.03	121.518	120.321		331.56	271.715	251.84	210.876	258.542	199.938	187.889	179.857
		7	74	32	6		74	32	14	10	157.954	94.107	77.242		208.99	200.108	190.347		139.42	131.477	130.077		366.944	294.215	267.589	211.023	297.374	225.584	207.319	199.805
		8	85	38	8		85	38	18	13	174.836	119.82	83.636		225.81	223.522	246.928		153.59	149.639	162.799		400.646	343.342	330.564	255.838	328.426	269.459	246.435	219.597
		9	121	46	9		121	46	19	14	196.919	157.852	113.893		228.95	229.682	248.5		183.163	184.188	180.829		425.869	387.534	362.393	260.125	380.082	342.04	294.722	227.911
		10	153	52	8		153	52	20	14	213.251	161.248	127.36		240.123	255.415	251.297		201.584	206.214	199.019		453.374	416.663	378.657	271.515	414.835	367.462	326.379	237.195
		11	182	60	9		182	60	23	16	243.532	180.715	159.874		252.031	269.844	270.235		206.799	207.52	202.42		495.563	450.559	430.109	298.587	450.331	388.235	362.294	248.493
		12	197	67	9		197	67	23	16	279.01	201.22	160.587		270.886	272.545	274.45		207.111	207.56	206.079		549.896	473.765	435.037	308.768	486.121	408.78	366.666	249.52
		13	217	73	10		217	73	26	18	306.065	226.091	160.997		288.026	287.201	286.316		233.814	231.799	229.161		594.091	513.292	447.313	342.236	539.879	457.89	390.158	282.188
		14	227	80	10		227	80	26	18	334.982	252.998	161.522		303.897	294.51	295.235		237.851	235.987	235.433		638.879	547.508	456.757	367.881	572.833	488.985	396.955	285.286
		15	238	84	11		238	84	29	20	358.547	283.036	163.574		314.998	315.221	316.43		266.974	265.147	262.319		673.545	598.257	480.004	404.538	625.521	548.183	425.893	302.07
		16	245	94	11		245	94	31	21	395.146	292.333	163.887		324.193	321.54	322.09		277.621	277.56	282.635		719.339	613.873	485.977	406.532	672.767	569.893	446.522	337.909
		17	267	104	11		267	104	31	21	408.108	301.647	178.541		326.726	324.987	322.871		287.921	288.58	285.987		734.834	626.634	501.412	407.151	696.029	590.227	464.528	345.036
		18	282	109	12		282	109	34	23	421.727	316.845	179.52		335.824	340.636	338.658		318.999	318.47	315.817		757.551	657.481	518.178	411.898	740.726	635.315	495.337	360.78
		19	295	117	12		295	117	34	23	441.462	328.22	180.523		343.914	366.472	355.686		338.535	329.339	326.979		785.376	694.692	536.209	416.299	779.997	657.559	507.502	374.045
		20	309	134	14		309	134	38	26	455.764	368.186	198.472		396.095	404.963	390.005		354.21	356.42	340.74		851.859	773.149	588.477	427.177	809.974	724.606	539.212	402.697
		21	317	140	13		317	140	39	26	477.223	380.874	202.641		400.019	405.722	401.811		365.741	363.161	355.121		877.242	786.596	604.452	430.097	842.964	744.035	557.762	407.77
		22	332	146	13		332	146	39	26	483.983	395.134	205.984		403.893	406.843	405.32		368.705	368.3	357.871		887.876	801.977	611.304	442.115	852.688	763.434	563.855	408.168
		23	346	150	14		346	150	42	28	500.799	409.536	218.411		439.819	434.84	426.196		384.12	379.634	370.62		940.618	844.376	644.607	484.407	884.919	789.17	589.031	439.196
		24	355	156	15		355	156	43	29	516.818	411.871	223.877		443.67	449.128	426.827		407.639	382.774	375.683		960.488	860.999	650.704	487.889	924.457	794.645	599.56	440.029
		25	371	160	14		371	160	44	29	529.61	426.371	226.335		469.372	464.631	443.439		415.888	408.118	407.993		998.982	891.002	669.774	494.898	945.498	834.489	634.328	449.671
